# Supplementary material
Source: PubMed Central journal article supplement (PMC10356580)
Supplement: BLOOD_BLD-2023-020100-mmc1.pdf [file BLOOD_BLD-2023-020100-mmc1.pdf]

## **Methods**

### CAR T cell manufacturing and chronic stimulation cultures

Lentiviral vectors were manufactured as previously described.<sup>9</sup> PBMCs were procured from Miltenyi Biotec and CD4 and CD8 cells were purified using magnetic beads (Miltenyi Biotec) and combined at a 1:1 ratio. T cells were activated using CD3/CD28 stimulatory beads (DynaBeads; Thermo-Fisher) at a ratio of 3 beads/cell and incubated at 37°C overnight. The following day, CAR lentiviral vectors were added to stimulatory cultures at a MOI of 2-4. Beads were removed after 6 day of stimulation, and cells were counted daily until growth kinetics and cell size demonstrated they had rested from stimulation. For all studies described, CAR constructs also encoded a truncated CD34 (tCD34) surface marker of transduction, separated from the CAR transgene by a P2A sequence. Both CD28 and 41BB-based CARs were composed of the FMC63 single chain variable fragment targeting CD19, CD8 $\alpha$  hinge and transmembrane regions, followed by a costimulatory domain and a terminal CD3 $\zeta$  signaling domain.

### General cell culture and flow cytometry

Unless otherwise specified, cells were grown and cultured at a concentration of  $1 \times 10^6$  cells/mL of standard culture media (RPMI 1640 + 10% FCS, 1% penicillin/streptomycin, 1% HEPES, 1% non-essential amino acids) at 37°C in 5% ambient CO<sub>2</sub>. All co-culture studies were performed at an effector cell to target cell ratio of 1:8, unless otherwise stated. Samples were stained with CD34 (BD, clone 581, #555824), CD4 (Biolegend, clone OKT4, #317444), CD8 (Invitrogen, clone SK1, #17-0087-42), PD1 (Biolegend, clone eh12.2h7, #329928), TIM3 (Invitrogen, clone F38-2E2, #17-3109-42), LAG3 (Biolegend, clone 11c3c65, #369314), CD62L (Biolegend, clone dreg-56, #304822), CD45RO (Biolegend, clone UCHL1, #204236) and 7-AAD (BD, #559925) in 100ul FACS buffer (2% FBS in PBS), washed once with the same buffer and analyzed on the Attune NxT Flow Cytometer (ThermoFisher). GFP<sup>+</sup> Nalm6 and GFP-CD34<sup>+</sup> CAR T cells were gated and analyzed using FlowJo v9 or 10 (BD Biosciences).

### CyTOF

Mass cytometry was performed as previously described.<sup>12</sup> Briefly, isolated CAR<sup>+</sup> T cells were live/dead stained with a short pulse of cisplatin and surface stained for 30 minutes at room temperature. Cells were then washed and fixed overnight at 4°C with fix/perm buffer (eBiosciences). Intracellular staining was performed the following day at 4°C for 1 hour. Cells were barcoded according to manufacturer's instructions (Fluidigm). Cells were washed and suspended in PBS containing 2% paraformaldehyde with Cell-ID Intercalator-IR. Mass cytometry data was collected on a Helios mass cytometer and analyzed using Cytobank (Beckman Coulter).

### Bulk RNA and ATAC sequencing and data analysis

RNA sequencing was performed on samples derived from 1 donor for day 0 samples and 4 donors for day 6 and 15 samples. Each assay was performed in technical triplicate and one sample from both day 15 samples was excluded due to poor RNA quality, resulting in n=3 samples at day 0, n=12 samples at day 6 and n=11 samples at day 15. Total RNA was extracted using Qiazol (Qiagen) and recovered by RNA Clean and Concentrator spin columns (Zymo). Samples were prepared according to library kit manufacturer's protocol, indexed, pooled, and sequenced on an Illumina NovaSeq 6000. Basecalls and demultiplexing were performed with Illumina's bcl2fastq2 software. RNA-seq reads were then aligned and quantitated to the Ensembl release 101 primary assembly with an Illumina DRAGEN Bio-IT on-premise server running version 3.9.3-8 software. All gene counts were then imported into the R/Bioconductor package EdgeR<sup>13</sup> and TMM normalization size factors were calculated to adjust for samples for differences in library size. The TMM size factors and the matrix of counts were then imported into the R/Bioconductor package Limma. Weighted likelihoods based on the observed mean-variance relationship of every gene and sample were then calculated for all samples and the count matrix was transformed to moderated log<sub>2</sub> counts-per-million with Limma's voomWithQualityWeights. Differential expression analysis was then performed to analyze for differences between conditions and the results were filtered for only those genes with Benjamini-Hochberg false-discovery rate adjusted p-values less than or equal to 0.05. Further analysis was performed using Partek Flow (Partek Inc). Geneset Enrichment Analysis was done using GSEA v4.1.0.

ATAC sequencing was performed on samples derived from 2 independent donors, also performed in technical triplicate resulting in n=6 samples for each time point. Omni ATAC-seq libraries were made as previously described.<sup>14</sup> Briefly, nuclei were isolated from 50,000 sorted CART19 cells, followed by the transposition reaction using Tn5 transposase (Illumina) for 30 minutes at 37°C with 1000rp mixing. Purification of transposed DNA was completed with DNA Clean and Concentrator (Zymo) and fragments were barcoded with ATAC-seq indices. Final libraries were double size selected using AMPure beads prior to sequencing. Paired-end sequencing (2 x 75 bp reads) was carried out on an Illumina NextSeq 500 platform. Adapters were trimmed using attack (version 0.1.5, <https://atactk.readthedocs.io/en/latest/index.html>), and raw reads were aligned to the GRCh37/hg19 genome using bowtie with the following flags: --chunkmbs 2000 --sam --best --strata -m1 -X 2000.<sup>15</sup> MACS2 was used for peak calling with an FDR cutoff of 0.05. Downstream analysis and visualization, including transcription factor motif analysis, was done using Partek Flow (Partek Inc).

### Single cell RNA sequencing

CAR T cells from chronic stimulation cultures were isolated using flow-based sorting as described. For clinical samples, frozen vials of peripheral blood from a patient who underwent CAR T cell therapy and experienced a transient partial response followed by disease progression were gently thawed, counted, and dead cells were removed (Dead Cells Removal kit, Miltenyi, #130-090-101). Resulting cell samples had viabilities of 92-98% and were stained using an anti-FMC63 antibody (Acro Biochemicals, clone Y45, #FM3-HPY53) and then enriched for CAR<sup>+</sup> cells using flow-based sorting. These cells were then processed using the 10x Genomics Chromium Single Cell V(D)J Reagent Kits (10x Genomics, PN-1000006, PN-1000020, PN-120262) to generate single-cell emulsions for barcoding, reverse transcription and cDNA amplification. Immediately following these steps, 10x barcoded fragments were pooled and attached to standard Illumina adaptors to generate a barcoded single-cell RNA library. Sequencing libraries were quantified by qPCR before sequencing on the Illumina platform using HiSeq 4000 instrument. Cell Ranger's count pipeline v6.1.1 (available at <https://support.10xgenomics.com/single-cell-gene-expression/software/pipelines/latest/using/count>) was applied to align reads and quantify gene expression of individual samples. Downstream single-cell analysis was performed using Seurat package v4.0.5 within the R programming environment v4.1.2.<sup>16</sup> Lower bound for the number of genes in individual cells was chosen based on binary logarithm distribution and was set to 9.8 for the dataset with chronic stimulation samples and 10.5 for the dataset with clinical samples. Additionally, cells with more than 7,500 genes for the dataset with chronic stimulation samples and 4,000 genes for the dataset with clinical samples were filtered out. The percentage of mitochondrial counts was calculated for every cell, and only cells with mitochondrial percentage less than 10% were used in further analysis. Filtered matrices were normalized using a scaling factor of 10,000 and centered. Two sources of unwanted variation, total number of counts and percentage of counts belonging to mitochondrial genes, were regressed using a linear model. Within the datasets samples were combined using the harmony batch correction function. UMAP dimensional reduction and shared nearest neighbor graph were calculated on harmony corrected PCA embeddings using 20 principal components. Number of principal components was selected based on the elbow plot. Graph-based clustering was performed on the reduced data. Differential expression analysis between clusters was performed using the MAST algorithm of Seurat R package<sup>17</sup>, p value adjustment was done using Bonferroni correction. CD8<sup>+</sup> T cells from the chronic stimulation dataset were processed with Monocle2 pseudotime analysis pipeline.<sup>18</sup> Seurat object were converted into CellDataSet object and used as an input. Differentially expressed genes between the clusters were identified with generalized linear model MAST, filtered by a significance level of p adjusted < 0.05 and used for cell ordering. Dimensionality reduction was performed with DDRTree method. The cells from the day 0 were set as the root of the trajectory. Single-cell regulatory network analysis was

performed with pySCENIC.<sup>19,20</sup> First, Seurat objects with raw filtered counts were converted into AnnData files via SaveH5Seurat and Convert functions from the SeuratDisk package (<https://github.com/mojaveazure/seurat-disk/>). Next, the adjacency matrix for transcription factors (hg38) and its targets were created using the GRNBoost2 algorithm.<sup>21</sup> Motif analysis was performed using the cisTarget database (<https://resources.aertslab.org/cistarget/>). Cellular enrichment for each regulon was calculated by the AUCell module<sup>19</sup> with default thresholds. Visualization and downstream analysis of pySCENIC output were performed with the SCoPeLoomR package (<https://github.com/aertslab/SCoPeLoomR/>).

#### T<sub>BDD</sub> gene signature development

We determined which genes were biomarkers, or specifically enriched, in day 15 19/BB bulk RNA data and cluster 8 from scRNAseq data using Partek Flow. The overlap of each data set was used to generate the 145 gene signature. For these genes we developed a “contribution score” by multiplying the fold change of each gene relative to all other samples (5 samples from bulk RNAseq and 11 clusters for scRNAseq) from bulk and scRNAseq data. The 10 genes with the largest score were used for analysis in Figure 4e.

#### CRISPR/Cas9 gene editing

CRISPR sgRNAs were designed using the CRISPick tool from The Broad Institute and the sgRNA design tool from Integrated DNA Technologies (IDT). Cells were electroporated using the Lonza 4D-Nucleofector Core/X Unit. Triple Reporter Jurkat cells were electroporated using the SE Cell Line 4-D Nucleofector Kit, and primary T cells were electroporated using the P3 Primary Cell 4-D Kit (Lonza). For Cas9 and sgRNA delivery, a ribonucleoprotein (RNP) complex was first formed by incubating 5µg of TrueCut Cas9 Protein V2 (Lonza) with 10µg of sgRNA for 10 min at room temperature. Cells were washed twice with PBS (Gibco) and spun at 100xg for 10 min and resuspended at a concentration of 2-10x10<sup>6</sup> cells/100µL in the specified buffer. The RNP complex and 100µL of resuspended cells were combined and electroporated. Pulse codes EO-115 and CV-104 were used for resting primary T cells and Jurkat cells, respectively. After electroporation, the cells were incubated in standard 10% RPMI for Jurkat cells and cytokine enriched 10% RPMI (5 ng/ml IL7 and 5 ng/ml IL15, both from Peprotech) for primary T cells for the duration of experiment. Primary T cells were stimulated after 18 hours using CD3/CD28 Dynabeads (Thermo-Fisher) at 1:3 cell to bead ratio and engineered with lentivirus 24 hours later.

To determine efficiency of gene disruption, TIDE (Tracking of Indels by DEcomposition) analysis was used to detect knock out (KO) efficiency. Genomic DNA from electroporated cells was isolated (Qiagen

DNeasy Blood & Tissue Kit) and 100-200ng were PCR amplified using Q5 Hot Start High Fidelity 2x Master Mix (NEB) and 10 $\mu$ M forward/reverse primers flanking the region of interest. Primers were designed such that the amplicon was at a target size ~1 kb. PCR products were gel or column purified and sequenced, and trace files were analyzed using TIDE web tool ([tide.nki.nl](http://tide.nki.nl)) to determine indel proportions. R<sup>2</sup> values were calculated, reflecting goodness of fit after non-negative linear modeling by TIDE software.<sup>22</sup>

#### Xenograft mouse models

6-10 week old NOD-SCID- $\gamma$ c<sup>-/-</sup> (NSG) mice were obtained from the Jackson Laboratory and maintained in pathogen-free conditions. Animals were injected via tail vein with 1x10<sup>6</sup> Nalm6 cells in 0.2mL sterile PBS. On day 7 after tumor delivery, either 0.125x10<sup>6</sup> or 0.5x10<sup>6</sup> CAR+ T cells (WT or *FOXO3*<sup>KO</sup>) were injected via tail vein in 0.2mL sterile PBS. Animals were monitored for signs of disease progression and overt toxicity, such as xenogeneic graft-versus-host disease, as evidenced by >10% loss in body weight, loss of fur, diarrhea, conjunctivitis and disease-related hind limb paralysis. Disease burdens were monitored over time using the Xenogen IVIS bioluminescent imaging system, as previously described<sup>9</sup> and animals were sacrificed when radiance reached >3x10<sup>9</sup> photos/sec/cm<sup>2</sup>/sr (5-log greater than background). To avoid skewing of radiance data, graphical representation for each group was stopped after death of the first animal in the group.

#### Statistical analysis

All comparisons between two groups were performed using either a two-tailed unpaired Student's t-test or Mann-Whitney test, depending on normality of distribution. Comparisons between more than two groups were performed by two-way analysis of variance (ANOVA) with Bonferroni correction for multiple comparisons. All results are represented as mean  $\pm$  standard error of the mean (s.e.m.). Survival data were analyzed using the Log-Rank (Mantel-Cox) test.

## Supplementary Figure Legends

**Supplementary Figure 1** | **a**, CAR expression in 19/28 and 19/BB after purification before co-culture (day 0) and after 15 days of chronic stimulation (day 15). **b**, Change in memory phenotype of CD4<sup>+</sup> CAR T cell products after either acute (single combination with Nalm6 cells) or chronic stimulation. **c**, Activation of central T cell transcription factors in CAR Jurkat cells engineered to express a triple fluorescent reporter system. **d-e**, tSNE projection of **d**, 19/28 and **e**, 19/BB cells evaluated by CyTOF. Expression of **f**, PD1, **g**, TIGIT and **h**, CD62L in 19/28 and 19/BB cells.

**Supplementary Figure 2** | **a**, PCA of RNAseq by donor (n=1 donor for day 0, n=4 donors for days 6 and 15). **b-c**, Volcano plot of DEGs at **b**, day 0 and **c**, day 6. **d**, KEGG pathways enriched in dysfunctional 19/28 and 19/BB cells. **e-h**, Overlap of genes with higher expression in 19/28 and 19/BB with previously published genesets defining exhausted tumor-infiltrating lymphocytes. Significance determined using Fisher's Exact Test. **i**, PCA of ATACseq by donor (n=2 donors).

**Supplementary Figure 3** | **a**, Proportion of each sample (19/28 or 19/BB at day 0, 6 or 15) contained within each cluster. **b**, KEGG pathways enriched in each cluster.

**Supplementary Figure 4** | **a**, Proportion of each CD8 cluster in day 15 samples. **b-c**, Expression of CD8 **b**, cluster 0 and **c**, cluster 1 markers in whole population analysis and in pseudotime analysis of CD8 cells.

**Supplementary Figure 5** | Approach to generate a signature of 41BB-driven CAR T cell dysfunction. Genes that were uniquely upregulated in day 15 (dysfunctional) 19/BB cells by bulk RNAseq were compared to genes that were uniquely upregulated in cluster 8 from our scRNAseq dataset. Genes that were shared from these two lists were used to generate the 41BB dysfunction signature of 145 genes. Filtering to identify genes in both datasets was performed with  $FDR < 0.05$  and  $\log_2$ -fold change  $> 1.5$ .

**Supplementary Figure 6** | **a**, Expression of *FOXP* transcripts over time. **b**, Expression of bZIP/AP1 factors over time. **c**, Enrichment of FOXO3 target genes in genes that marked identity of cluster 8. **d**, Expression of *FOXP3* transcripts over time in chronically stimulated 19/28 and 19/BB cells. **e**, Expression of *FOXP3* in scRNAseq of 19/28 and 19/BB cells collected at day 0, 6 and 15. Table on left represents  $\log_2$ -fold change (LFC) in expression of *FOXP3* in each cluster that it is found to be enriched with associated false discovery rate (FDR).

**Supplementary Figure 7** | **a**, Sequencing analysis of genomic *FOXO3* in CAR T cell manufacturing products demonstrating high-efficiency knockout. Performed using Synthego ICE. **b**, T cell expansion during manufacturing of 19/28 or **c**, 19/BB cells with genomic disruption of *FOXO3*. N=3 independent donors. **d**, Expansion of *FOXO3*<sup>KO</sup> or WT 19/28 or **e**, 19/BB CAR T cells during chronic stimulation. Representative data from n=3 independent donors. **f**, Western blot of lysates from CAR T cells engineered to overexpress *FOXO3*. **g**, T cell expansion during manufacturing of 19/28 and 19/BB with overexpression of *FOXO3*. N=2 independent donors. **h**, Expansion of *FOXO3*<sup>OE</sup> 19/28 or **i**, 19/BB CAR T cells during chronic stimulation. Representative data from n=2 independent donors. **j**, Expression of 7AAD by CAR<sup>+</sup> T cells. **k**, CAR T cell size as measured by forward scatter area over the course of chronic stimulation. Representative data from n=3 independent donors. Statistical significance determined by two-tailed ANOVA with Bonferroni correction for multiple comparisons.

**Supplementary Figure 8** | **a**, Nalm6 progression over time after treatment with  $0.125 \times 10^6$  CAR T cells or **b**,  $0.5 \times 10^6$  CAR T cells. Radiance curves were stopped at time of first animal death. Significance determined using two-way ANOVA. **c**, Individual animal radiance over time. For all studies n=5 animals per group.



# Supplementary Figure 1

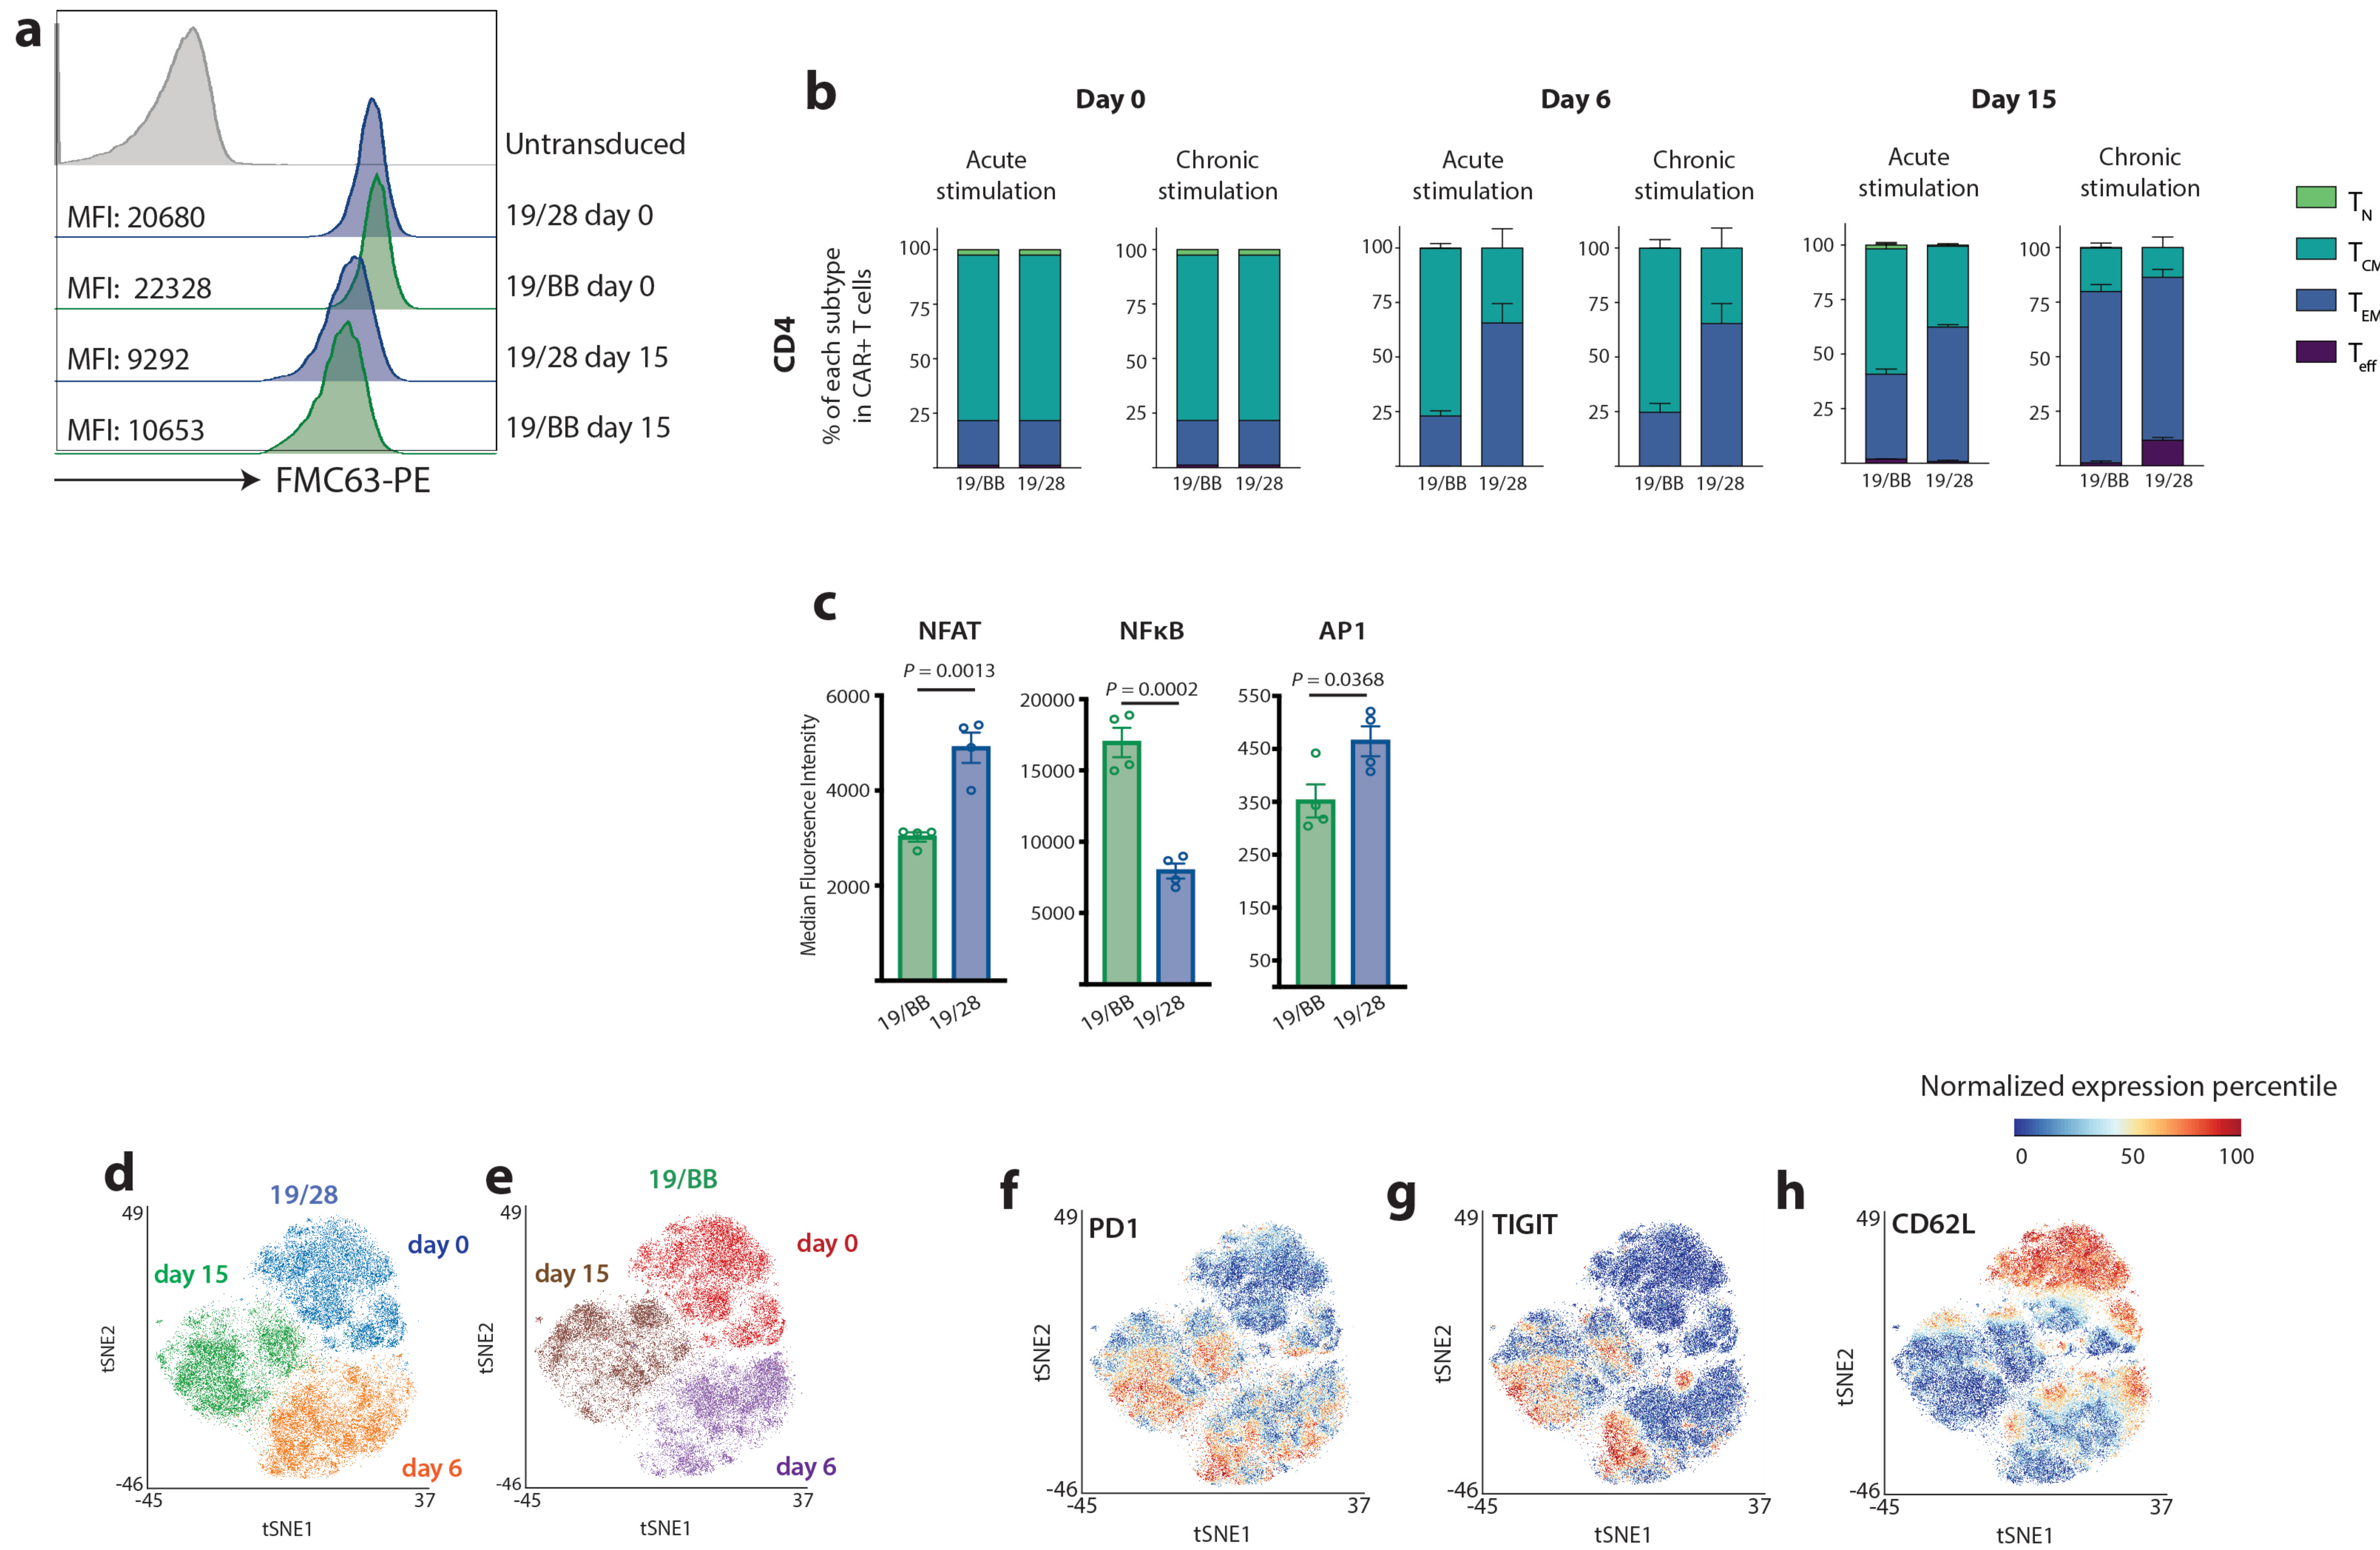



# Supplementary Figure 2

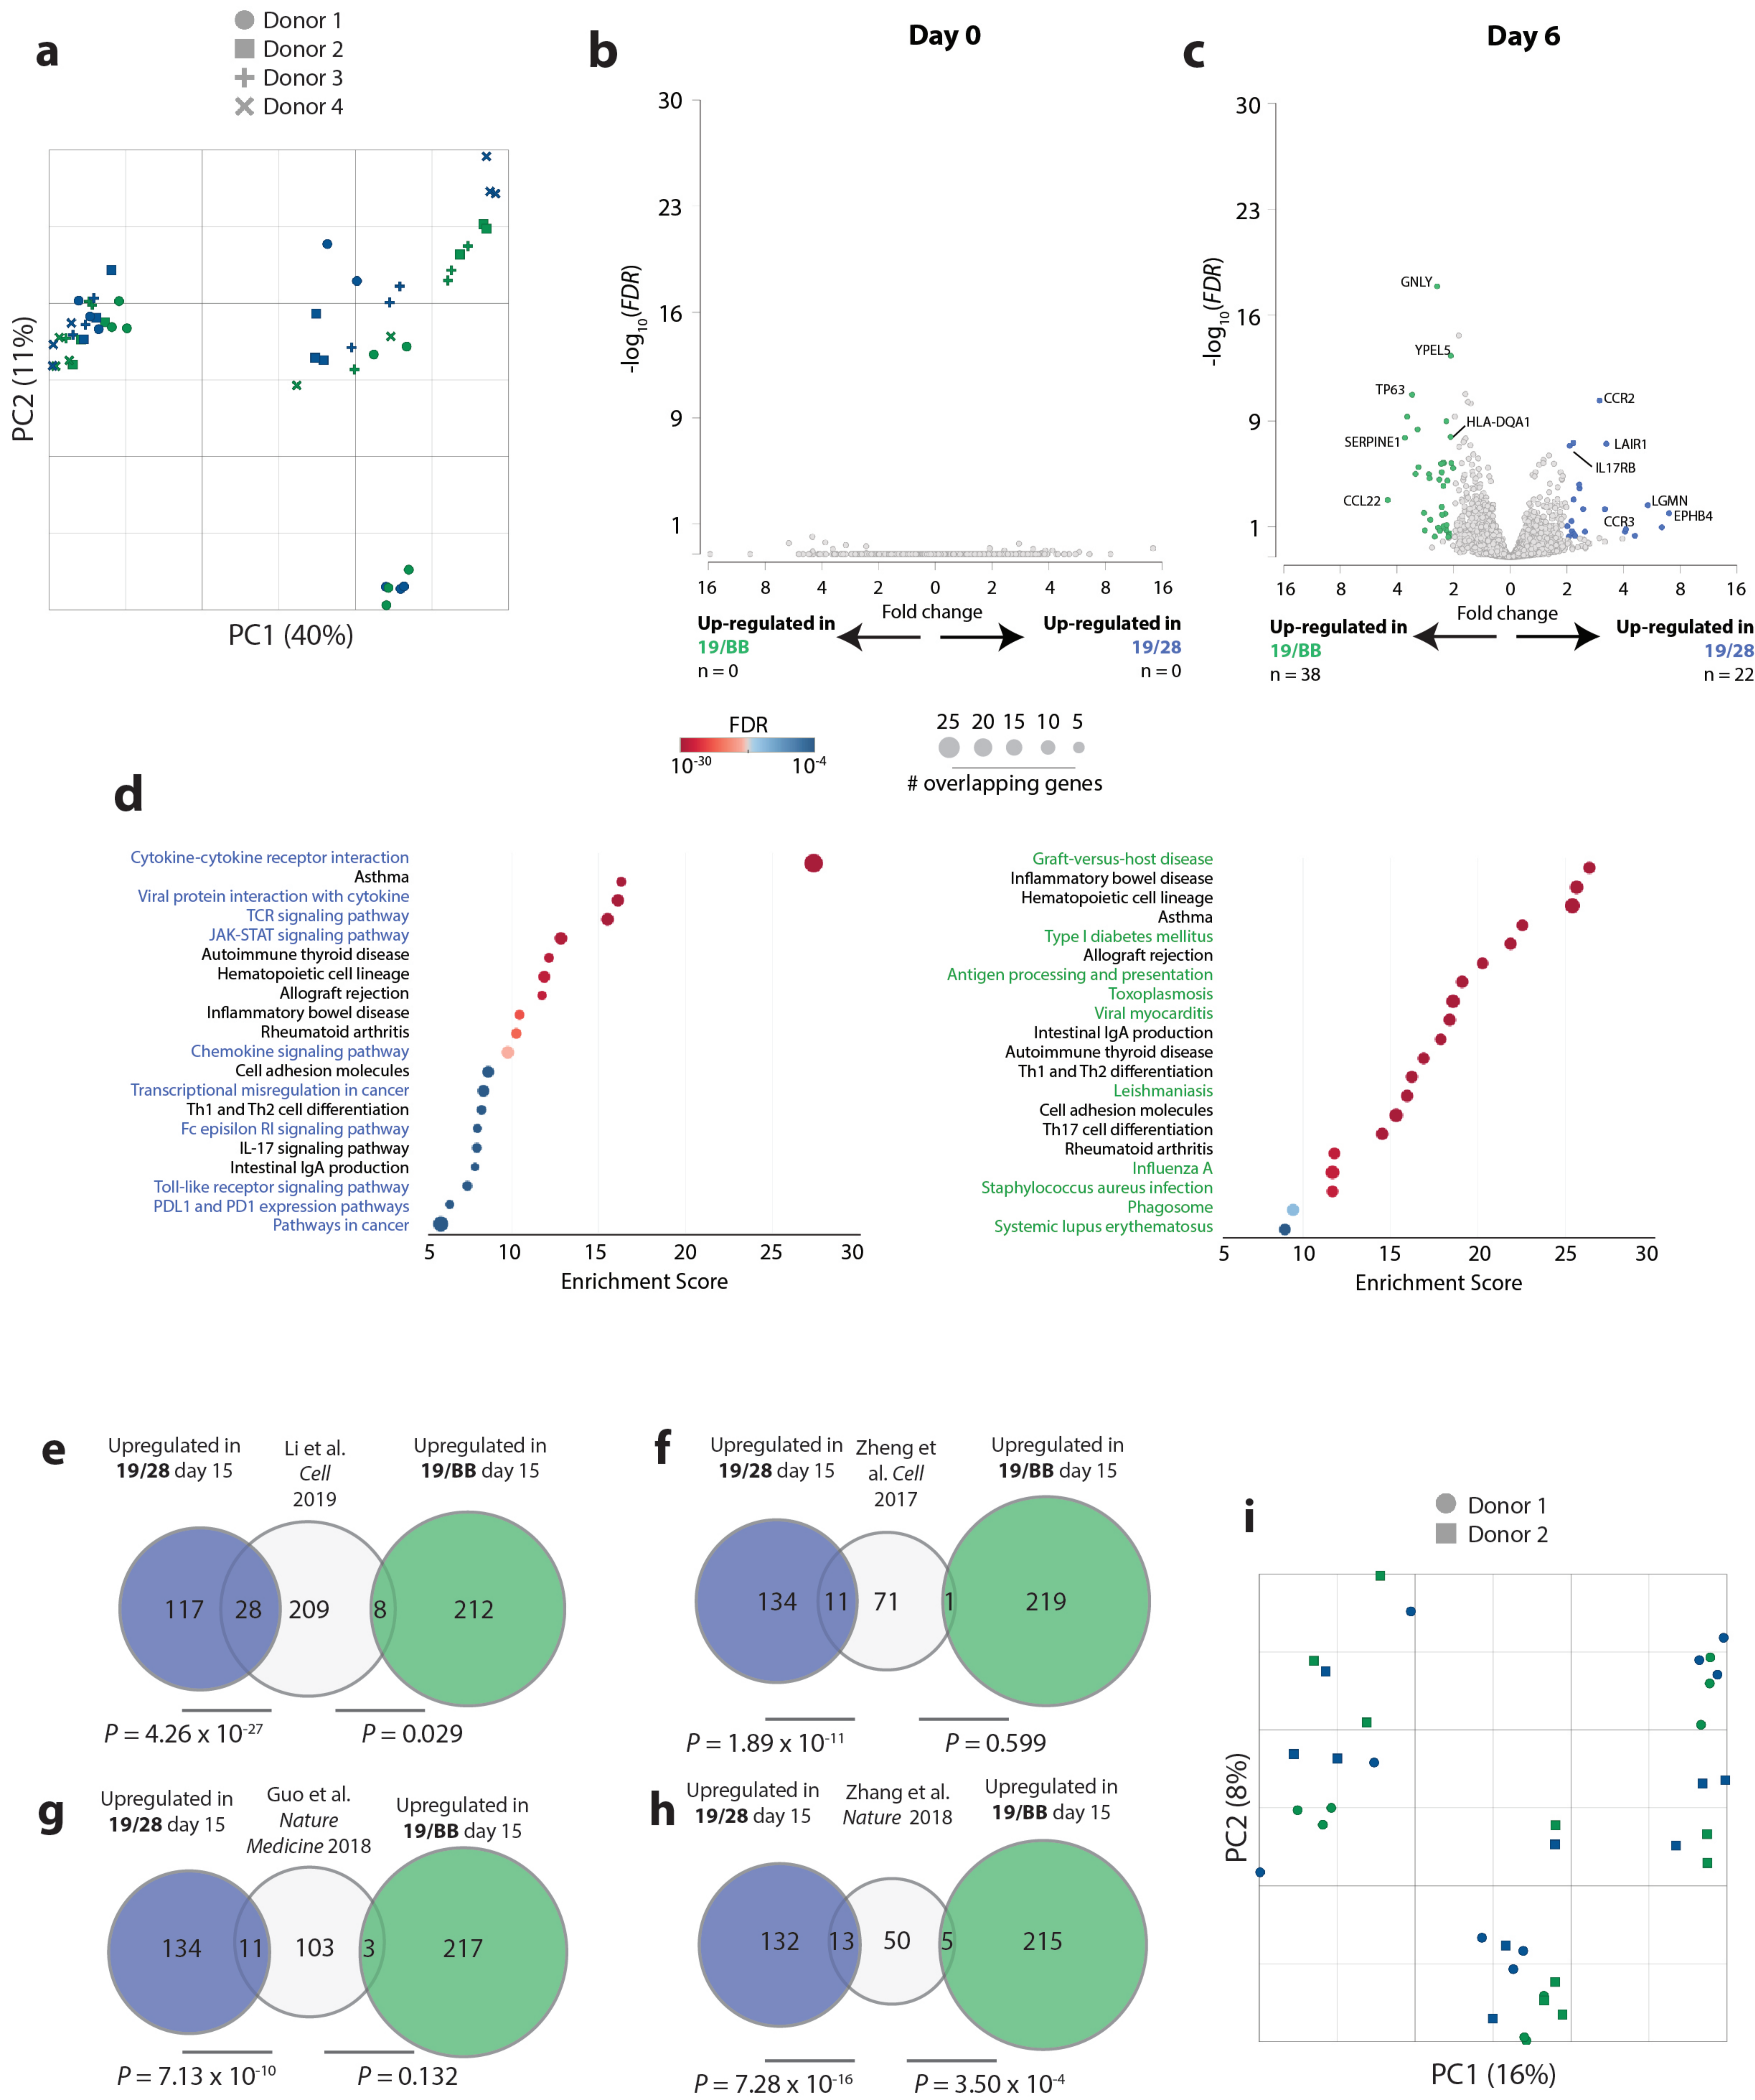

# Supplementary Figure 3

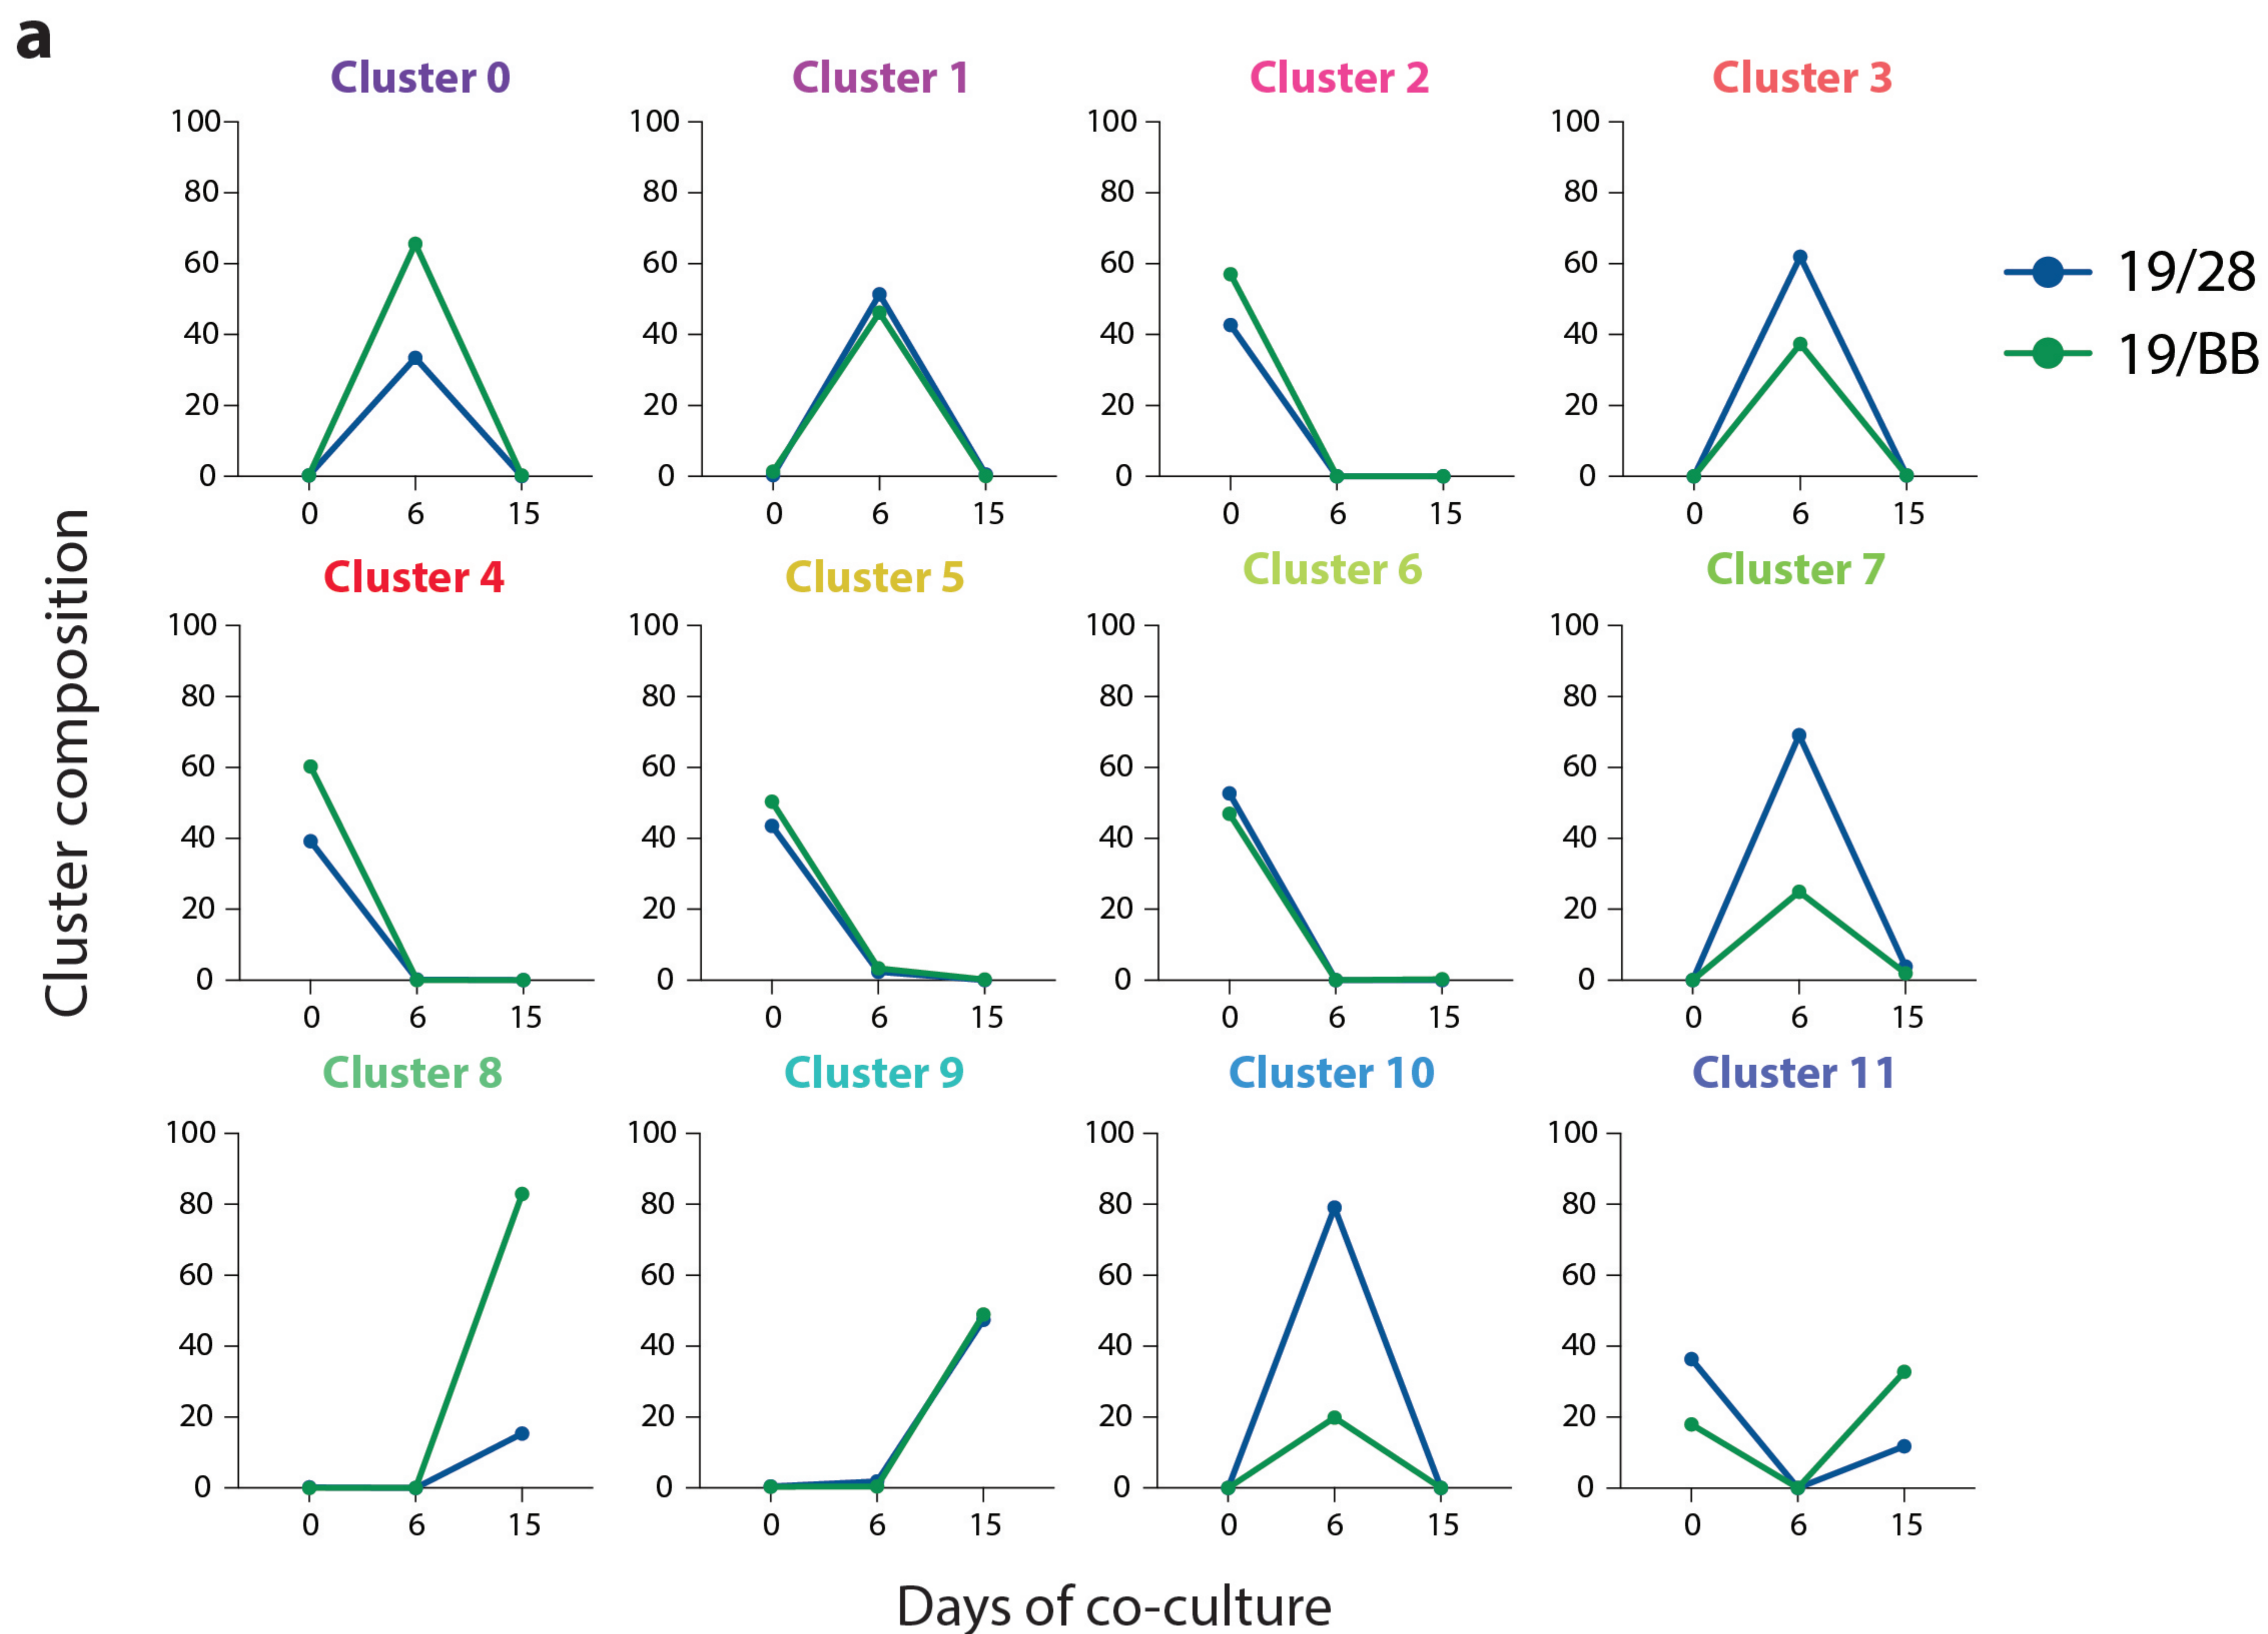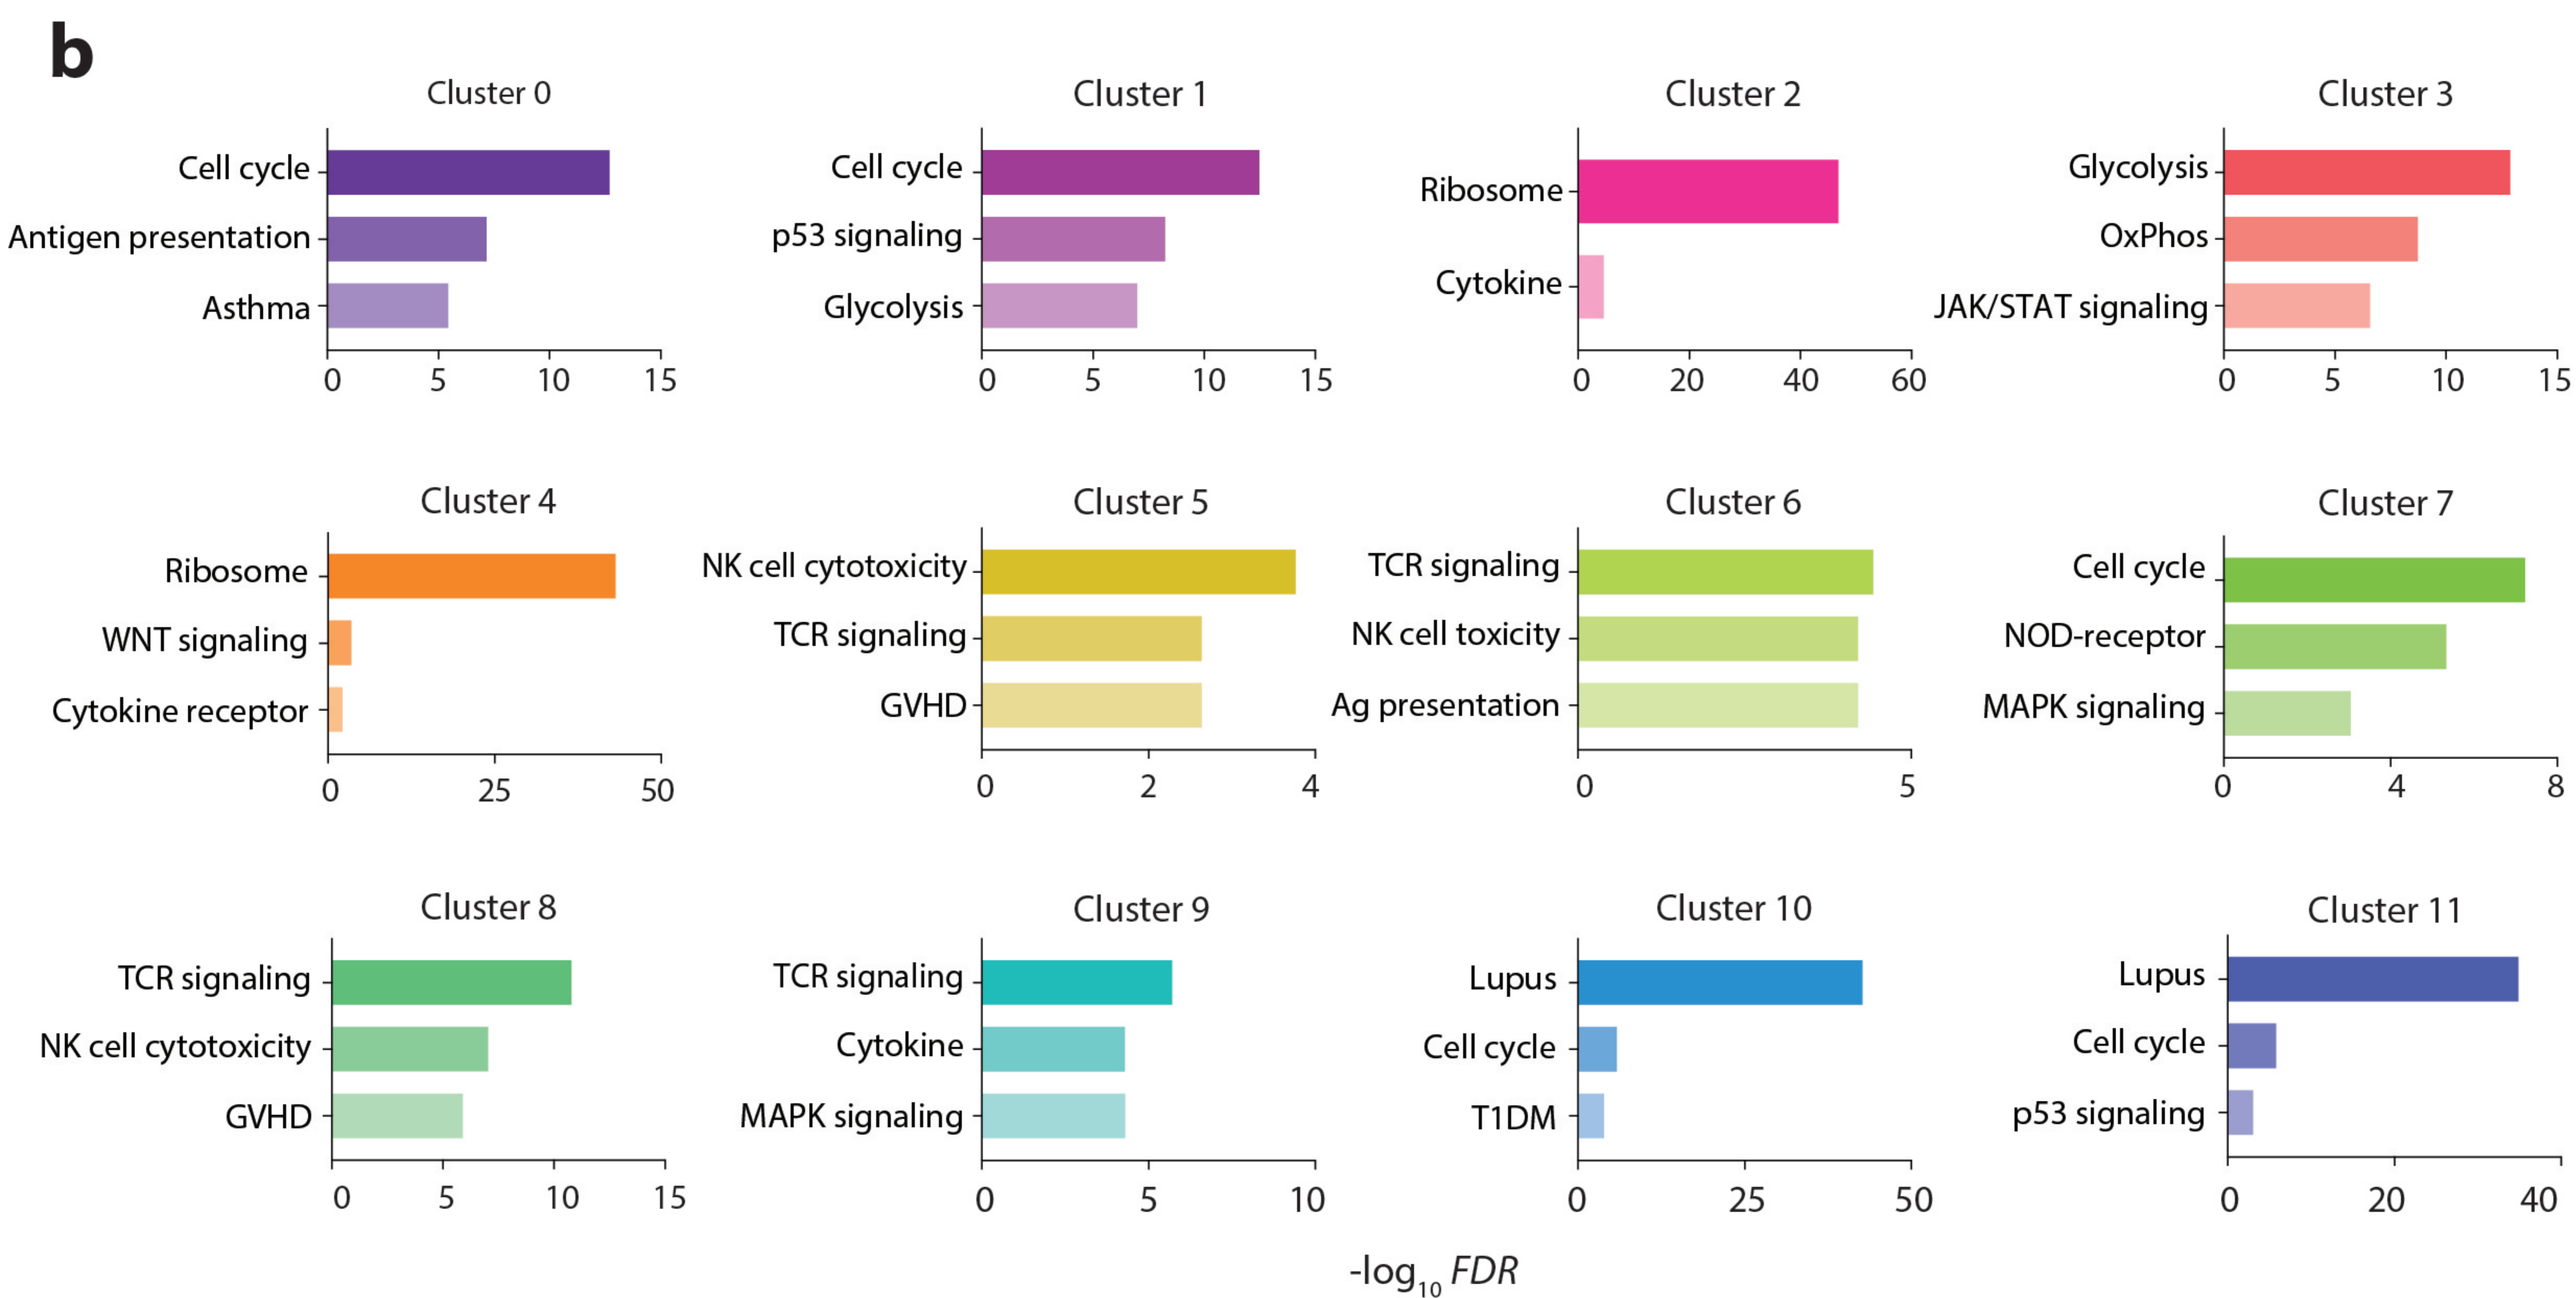

# Supplementary Figure 4

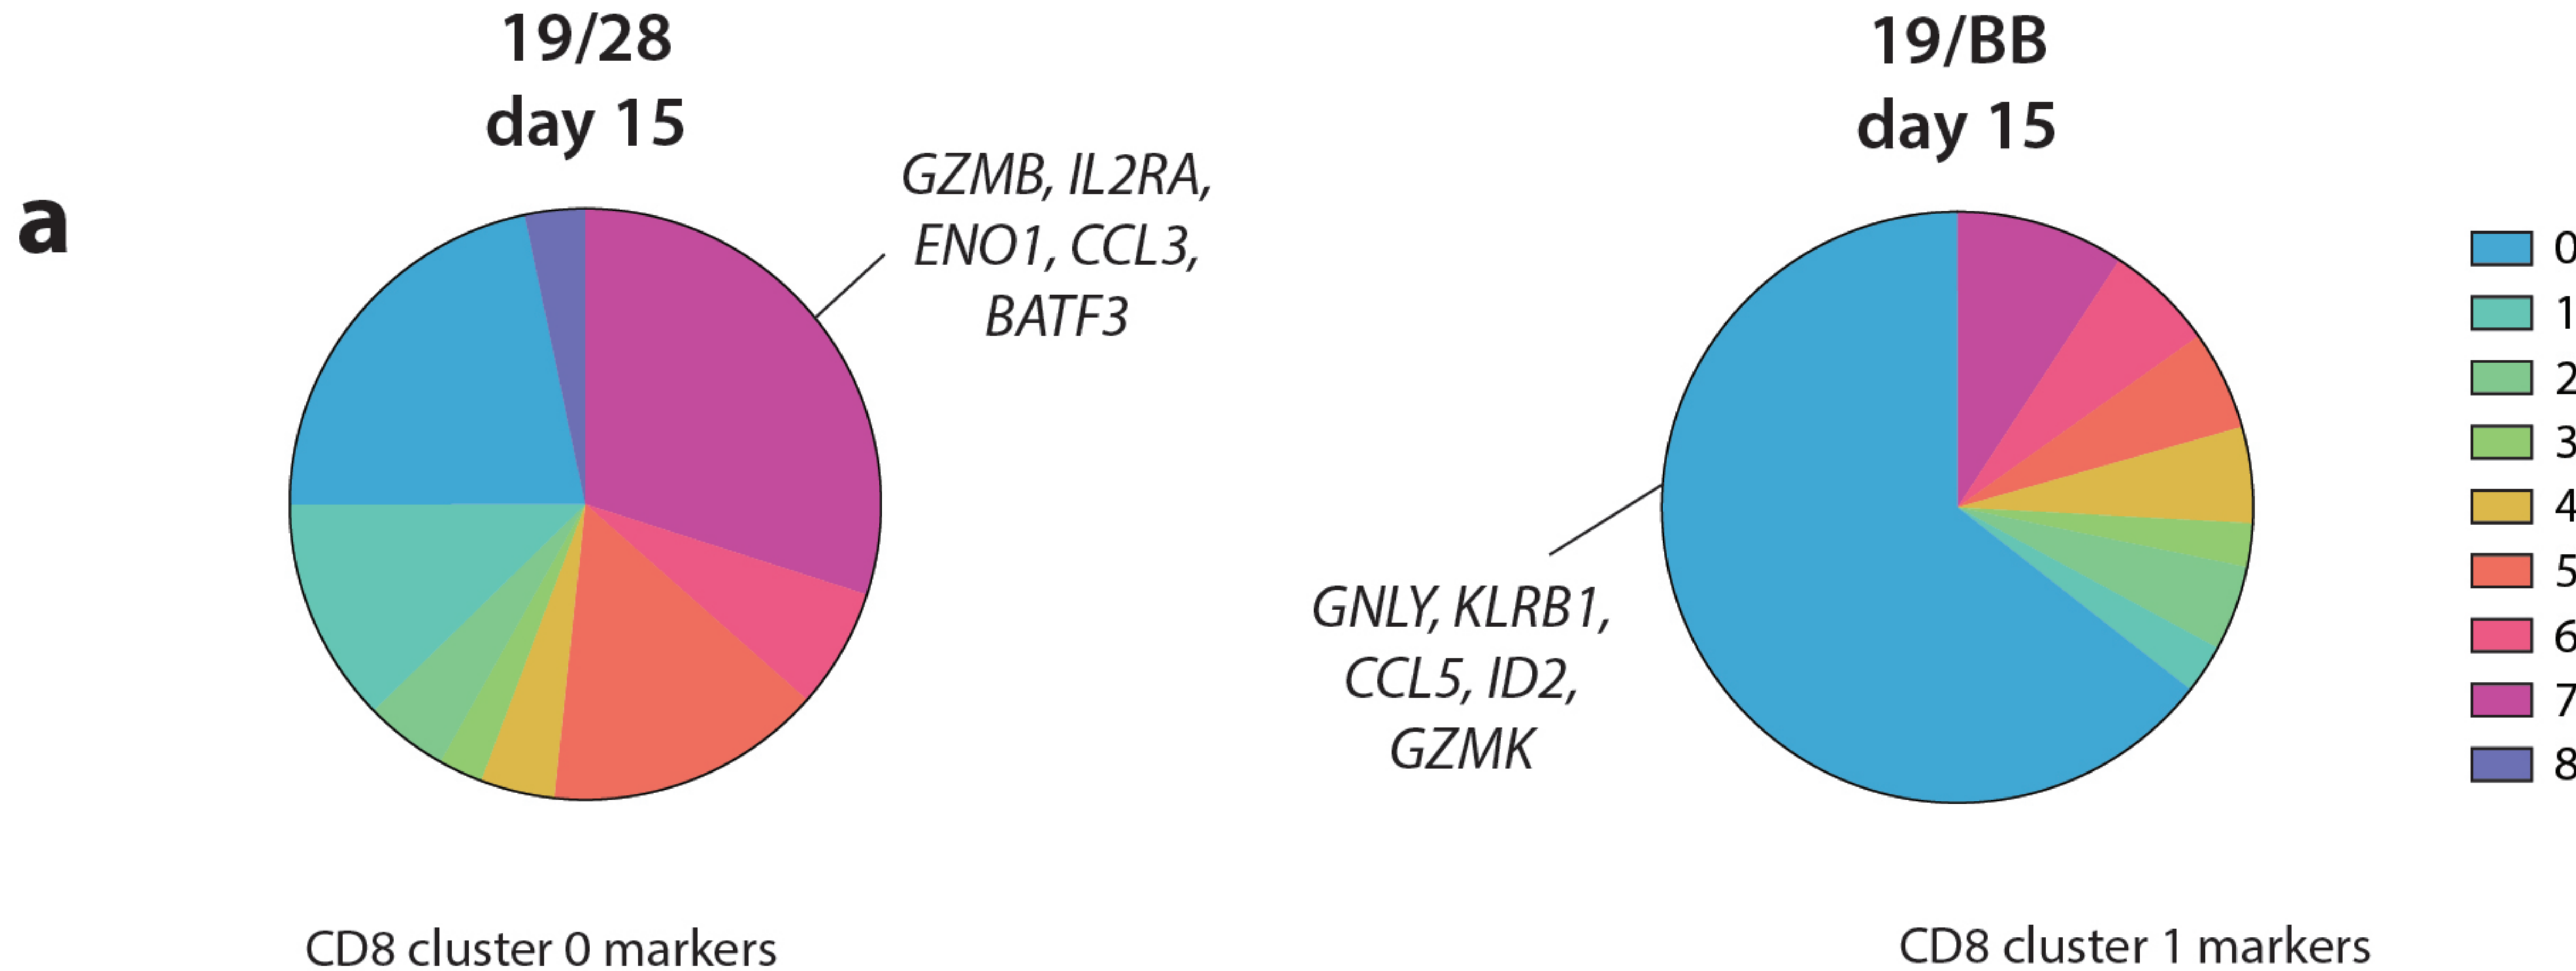

# Supplementary Figure 5

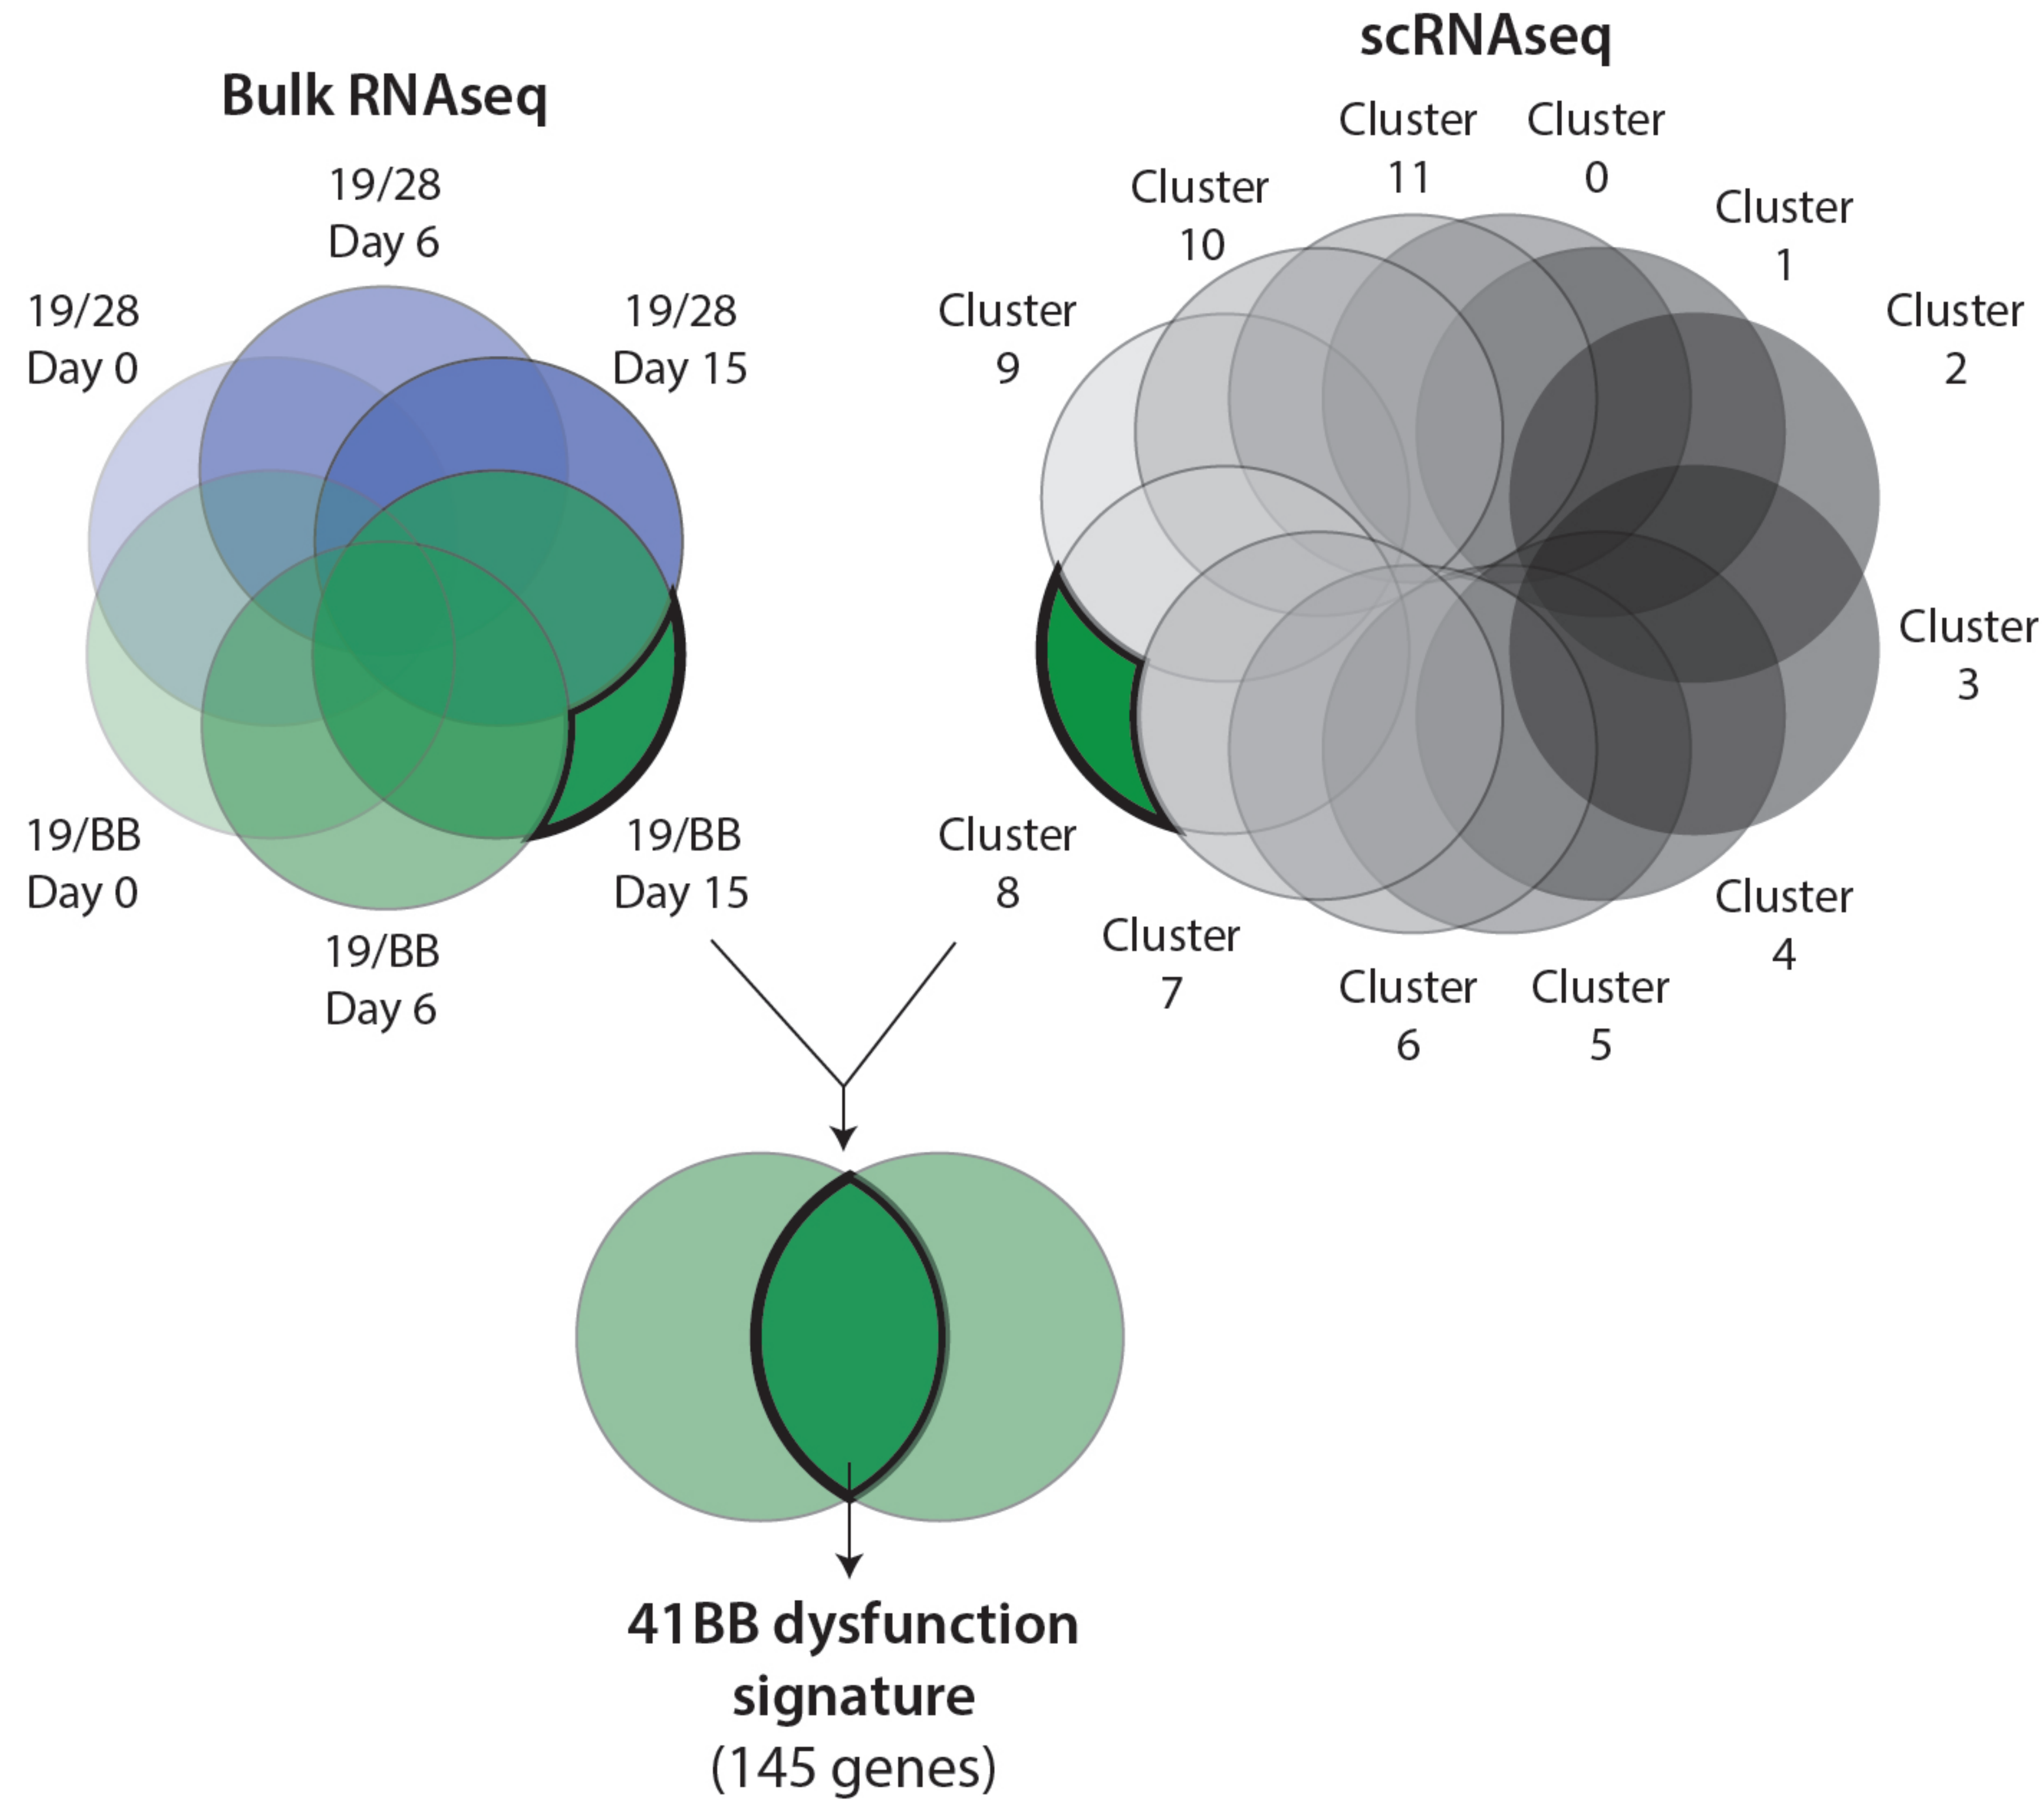

# Supplementary Figure 6

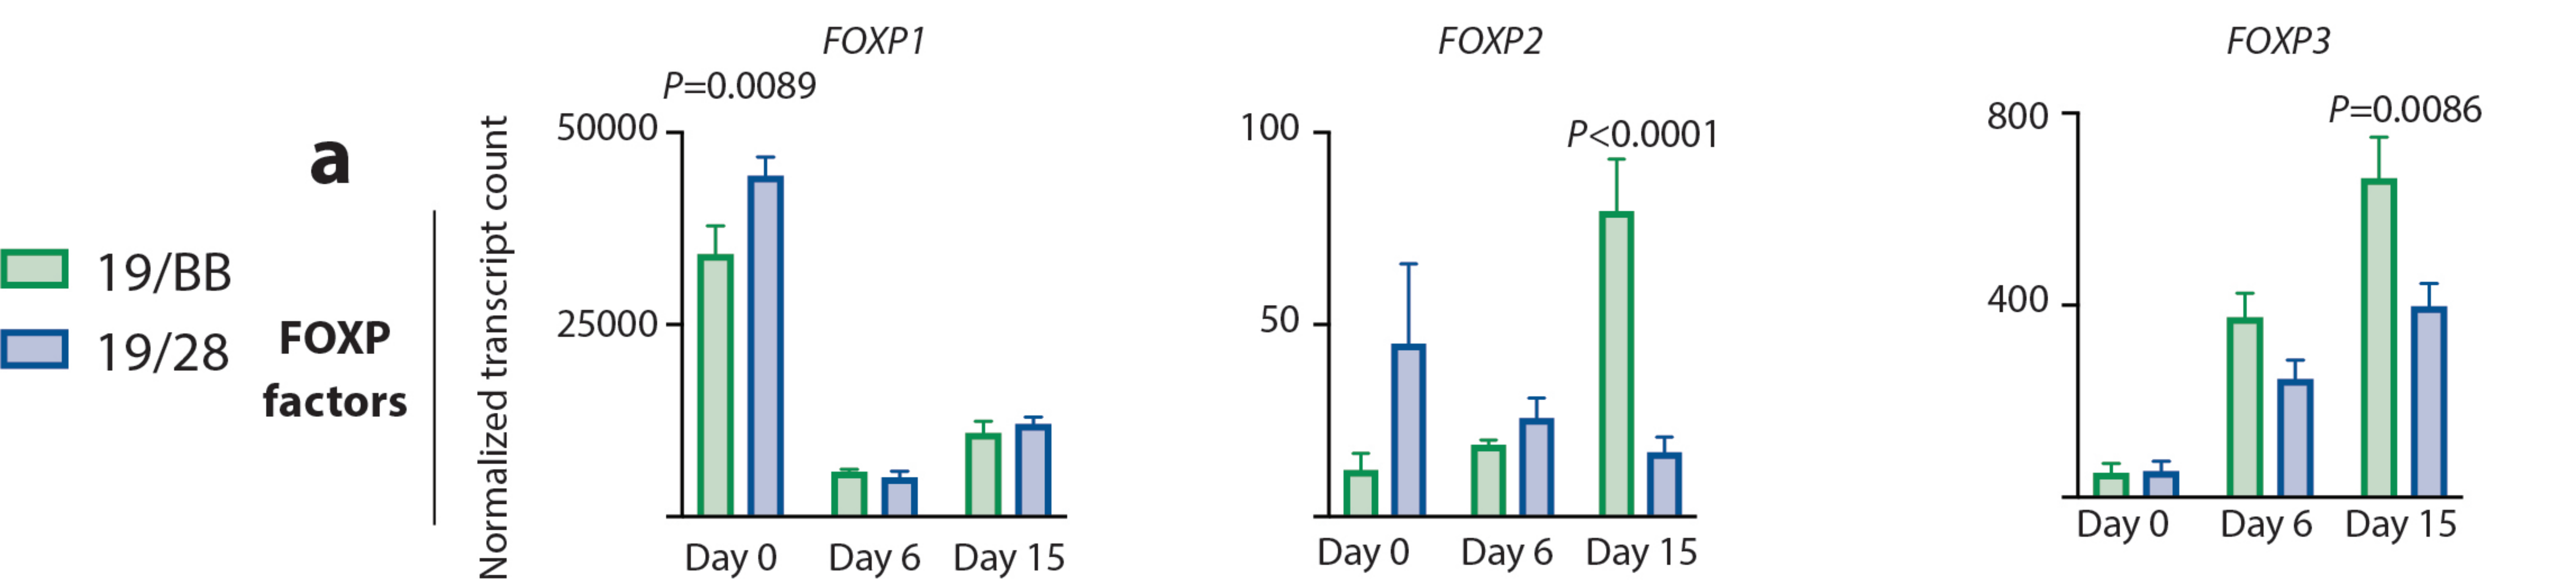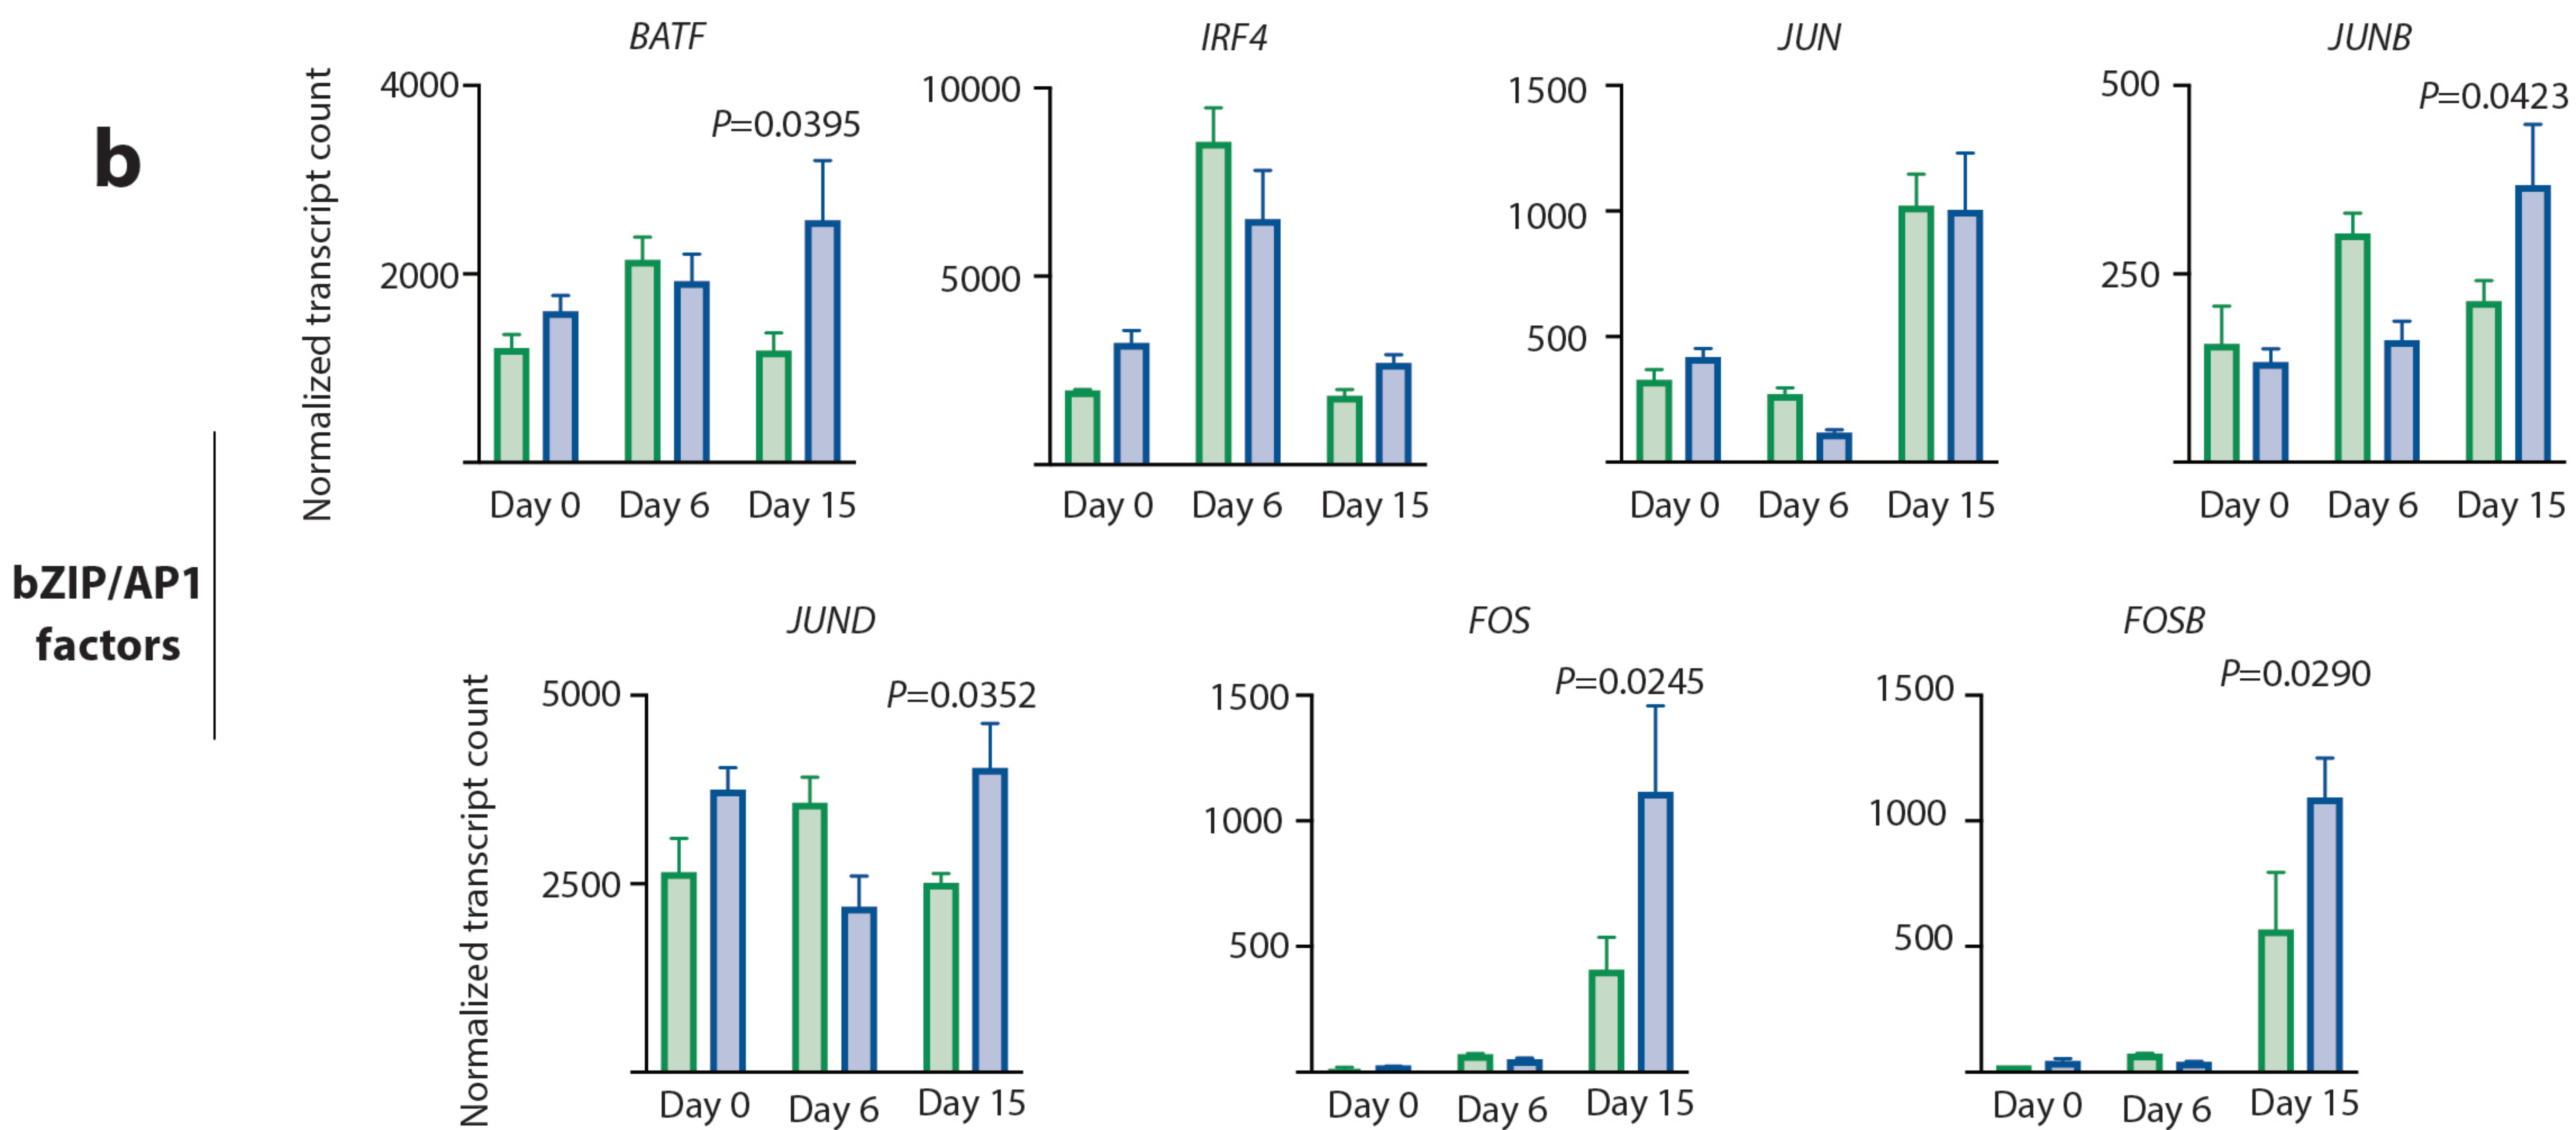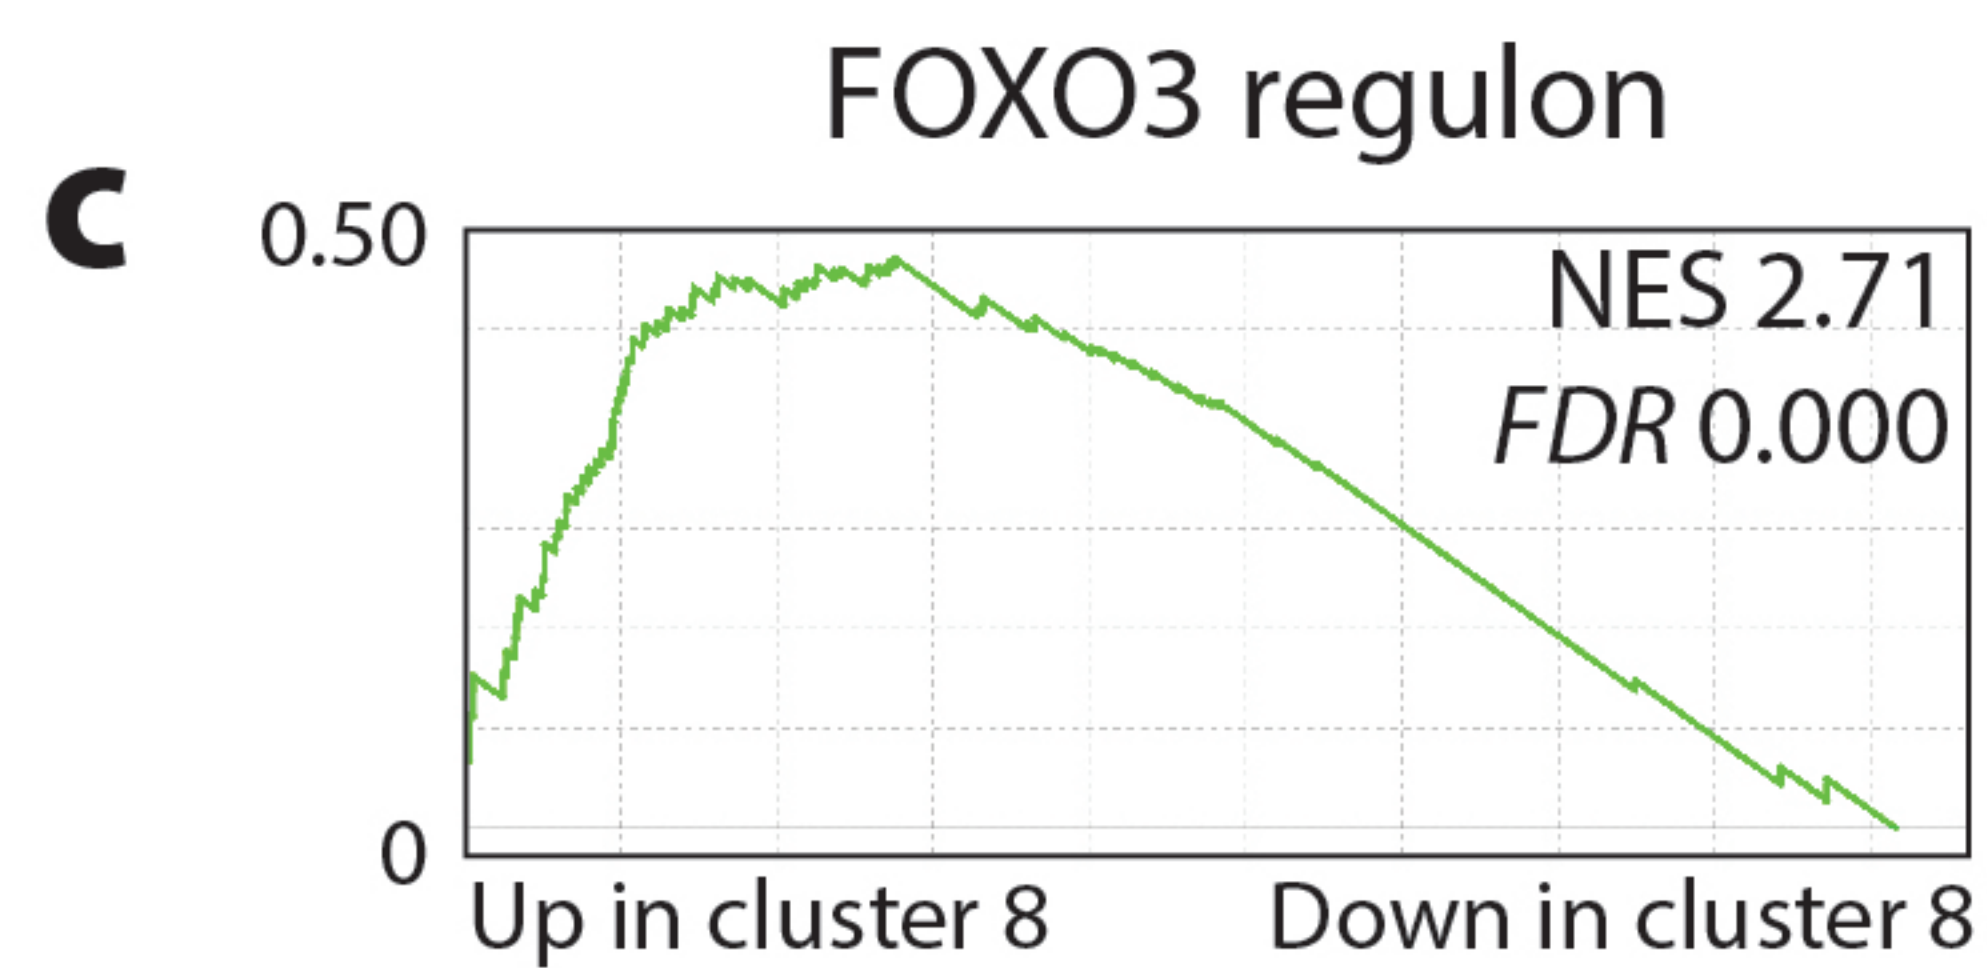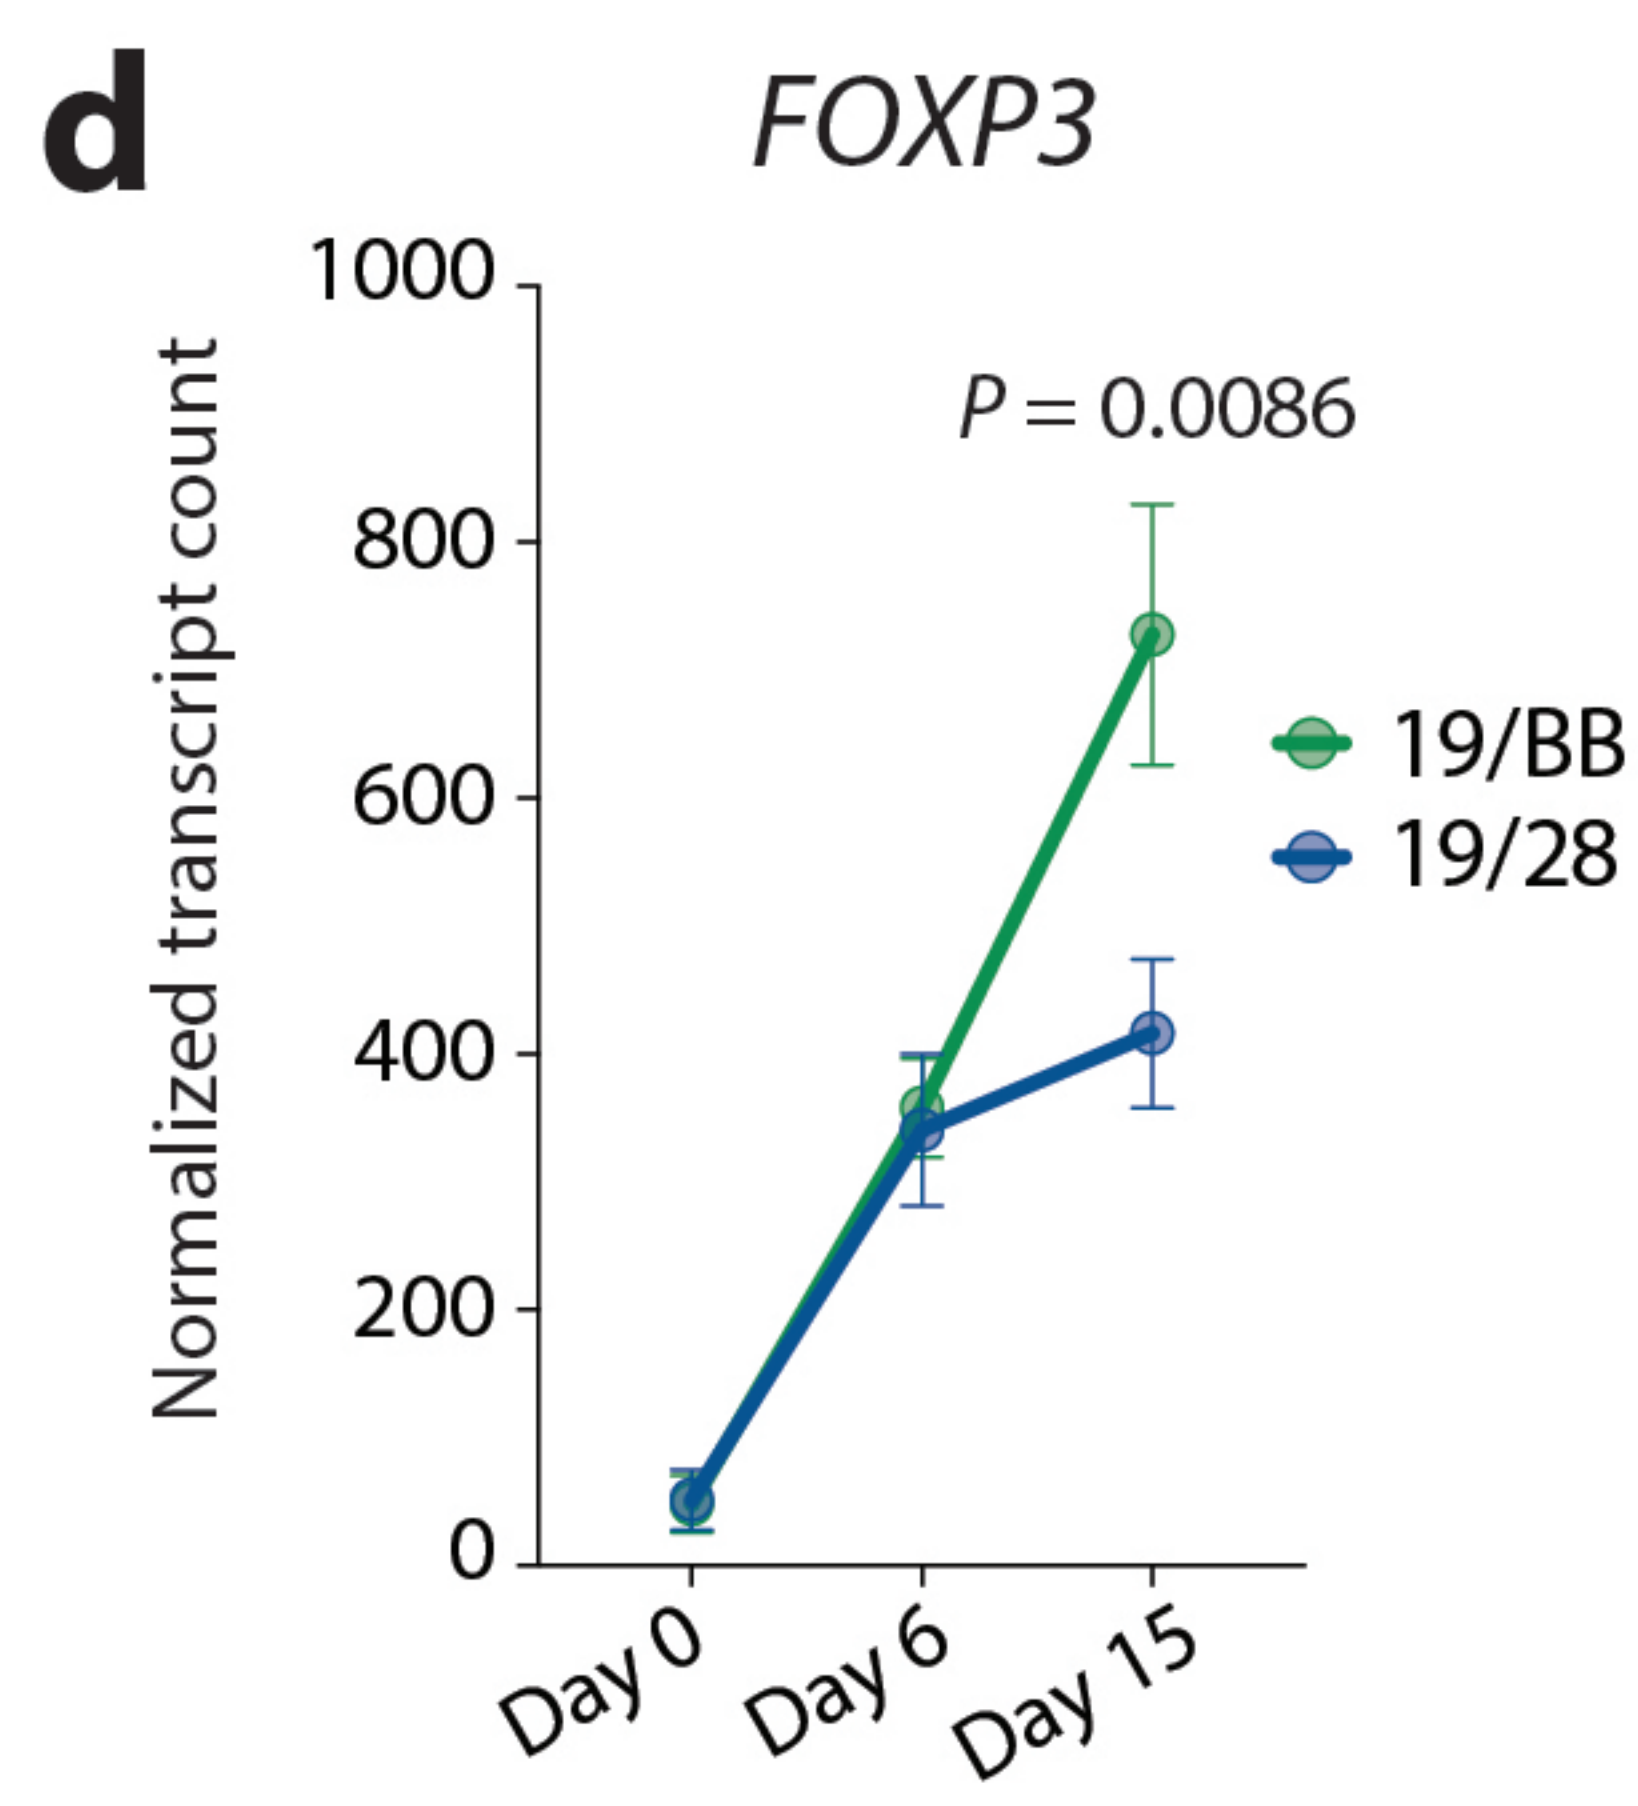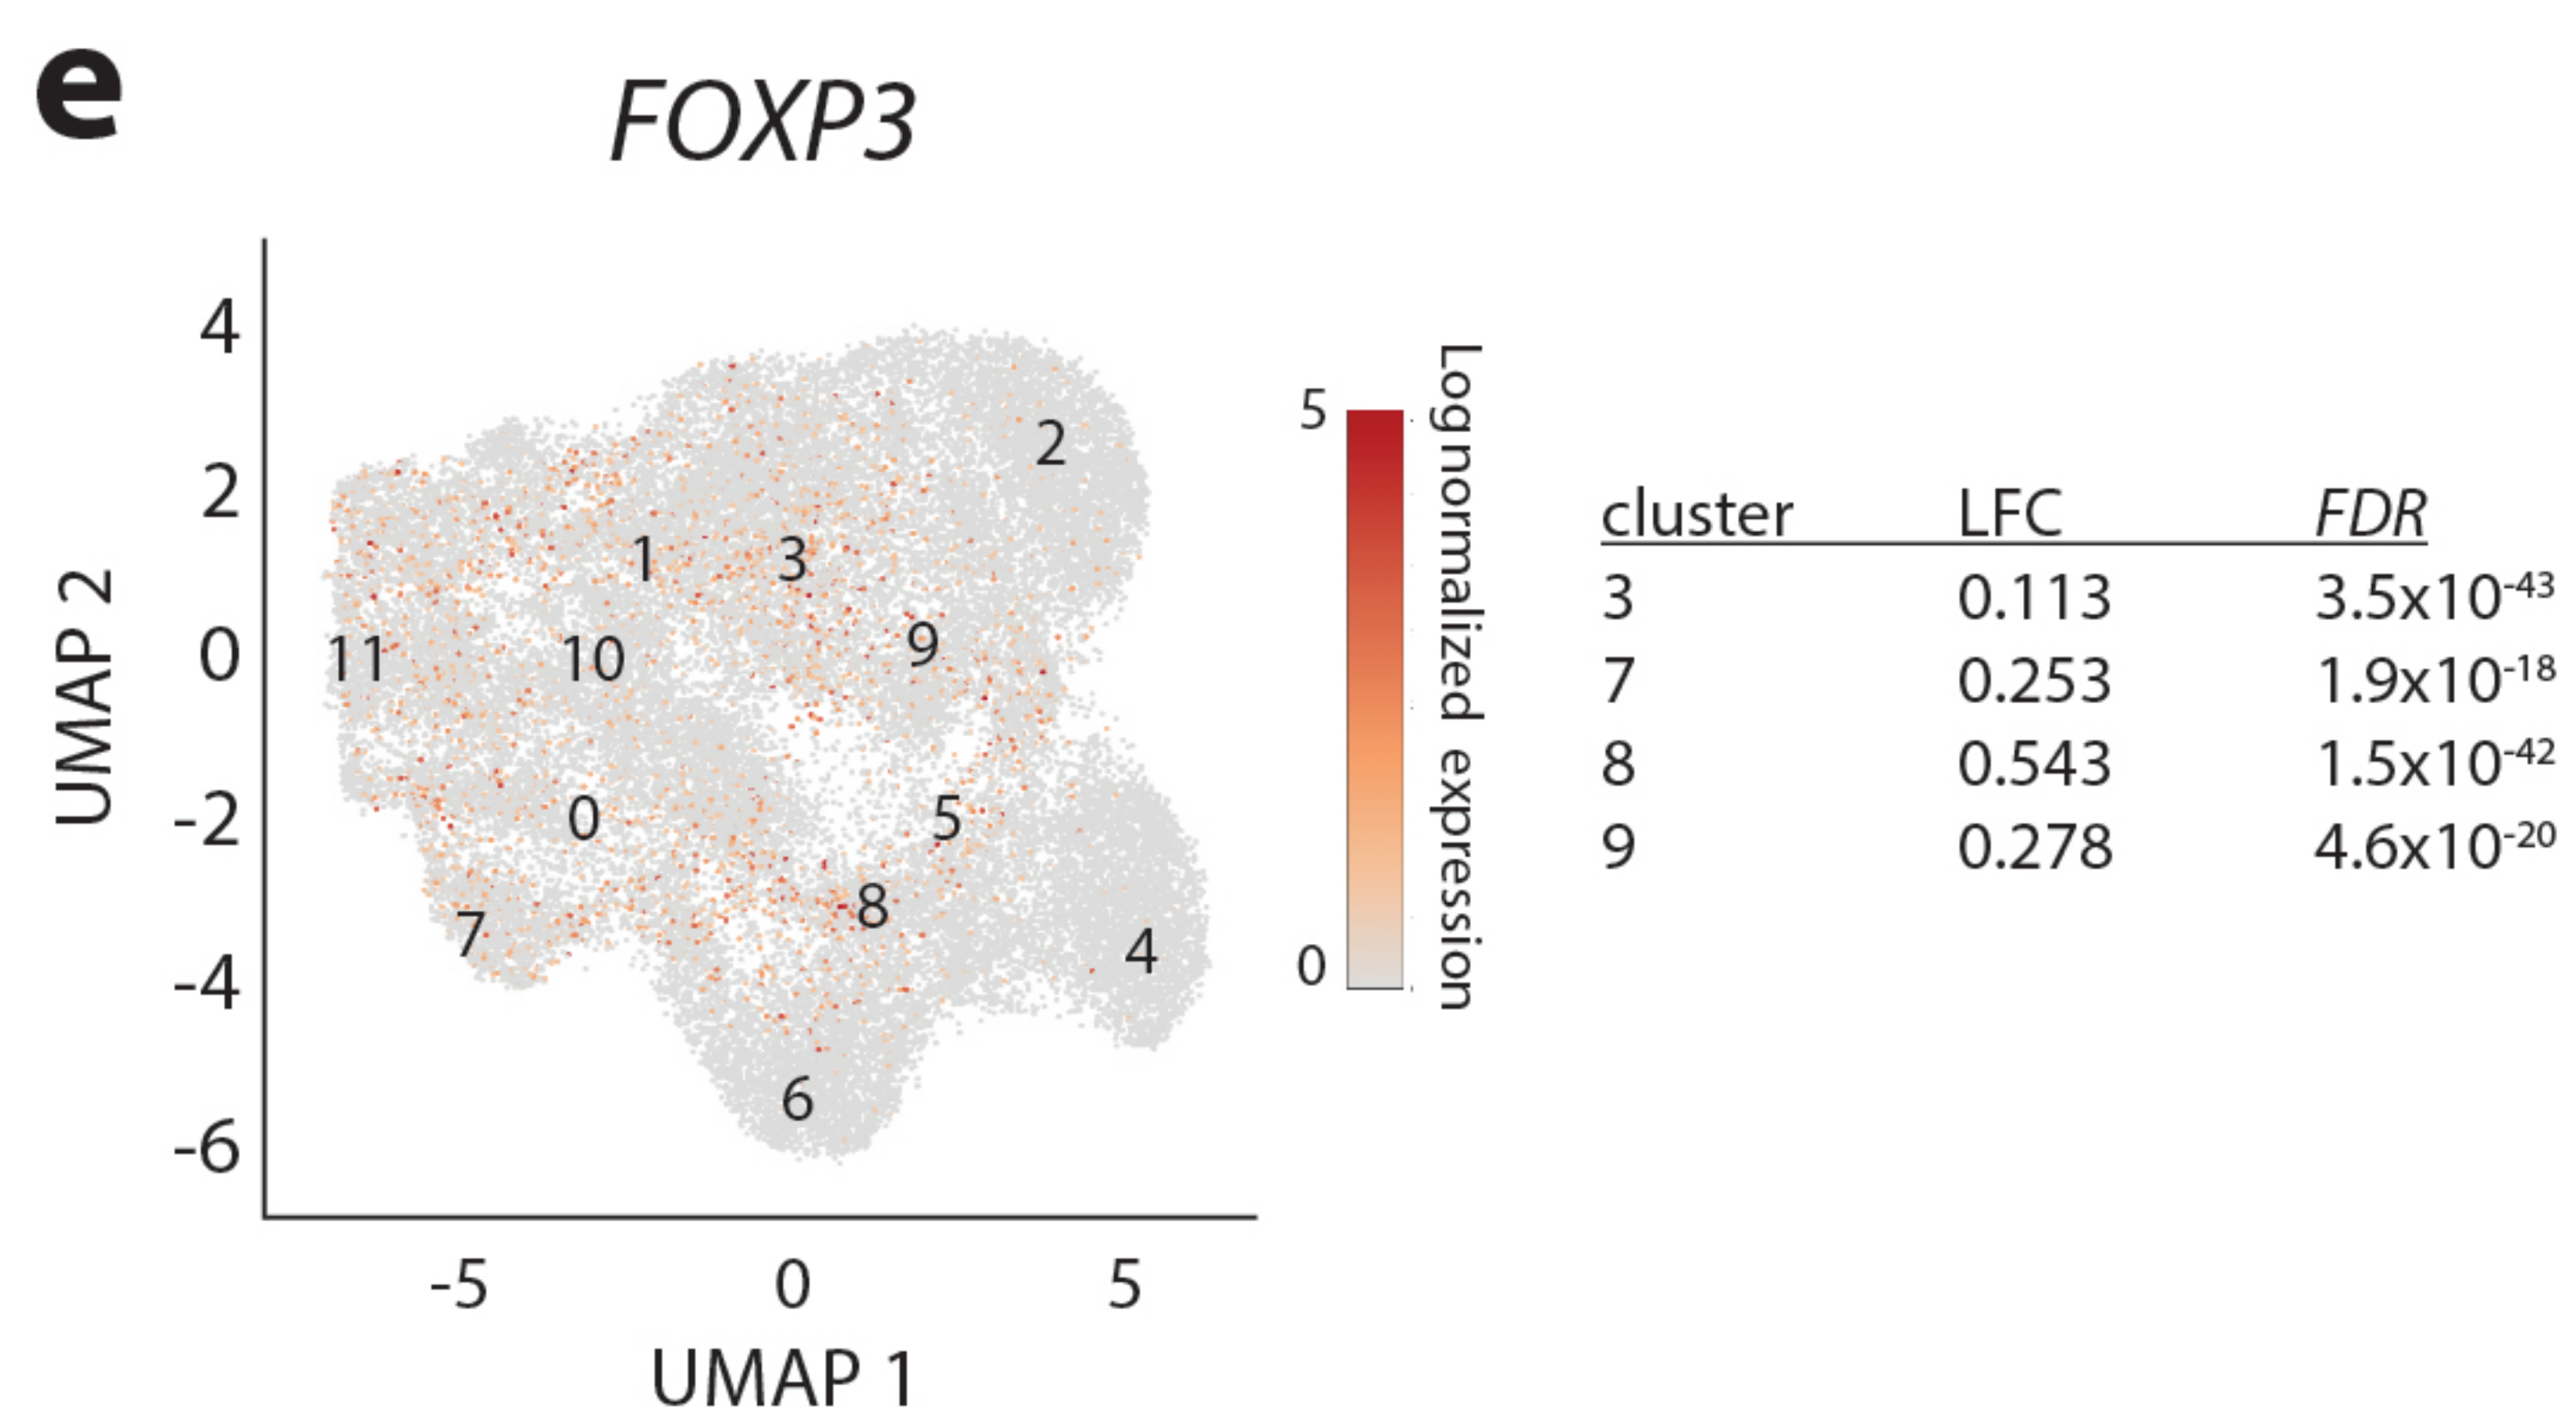

# Supplementary Figure 7

**a**

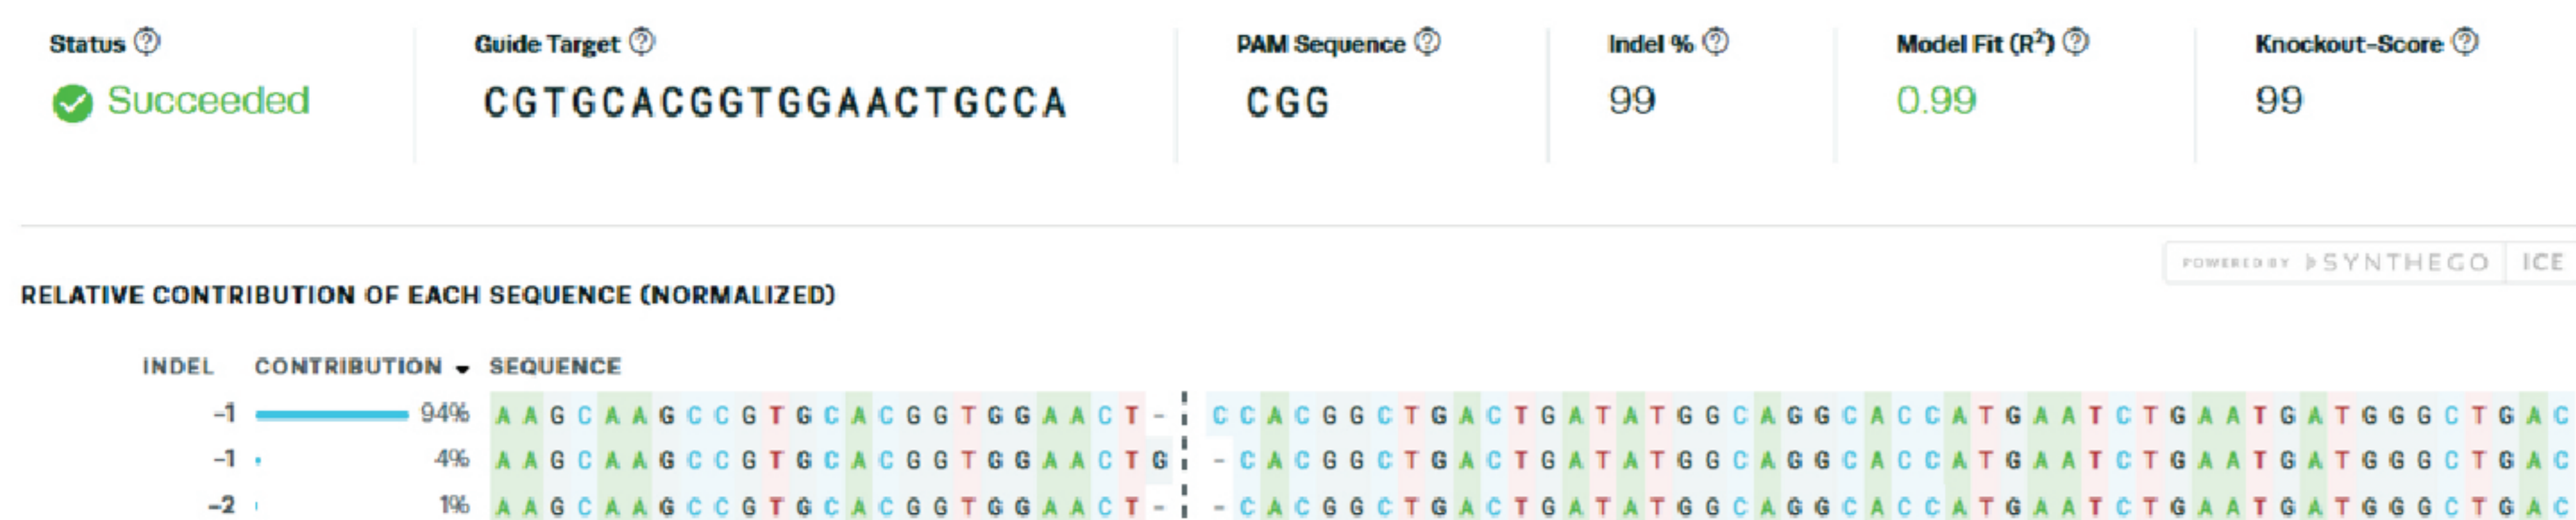

**b**

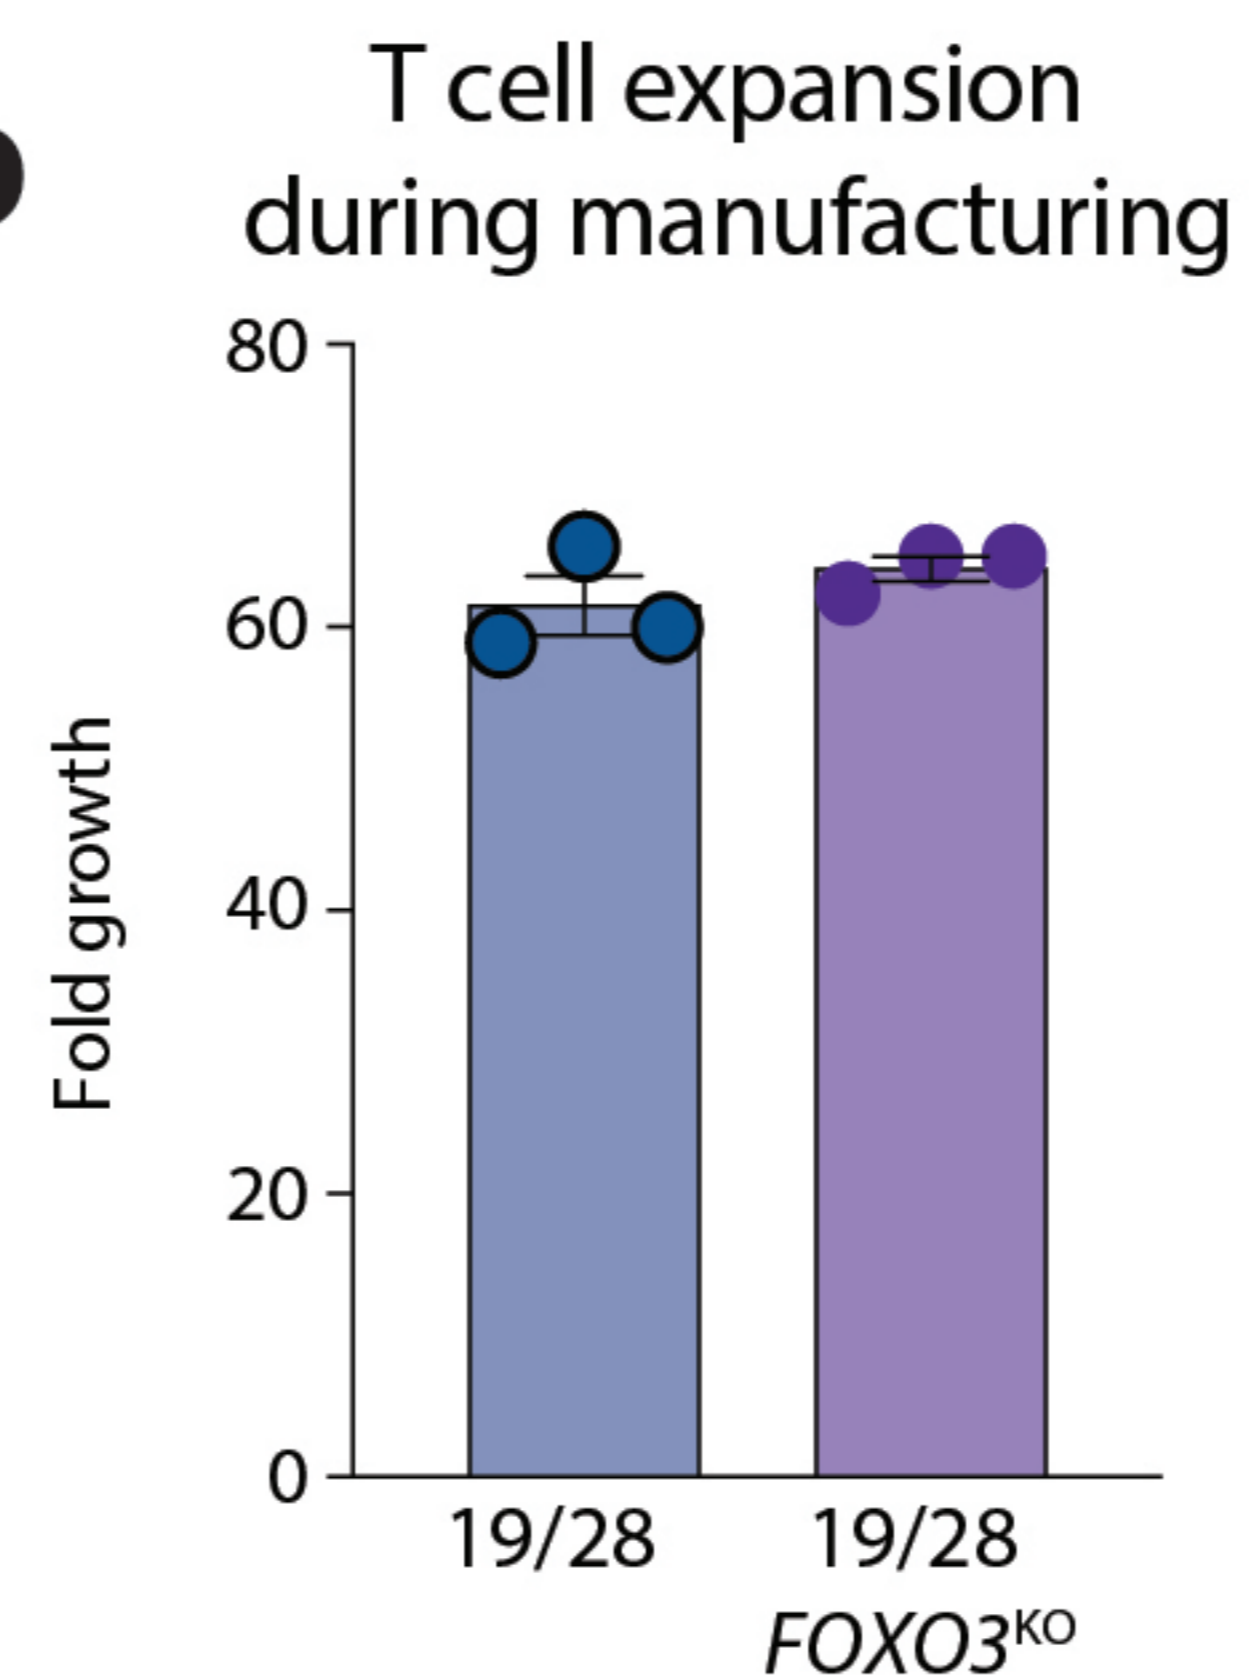

**d**

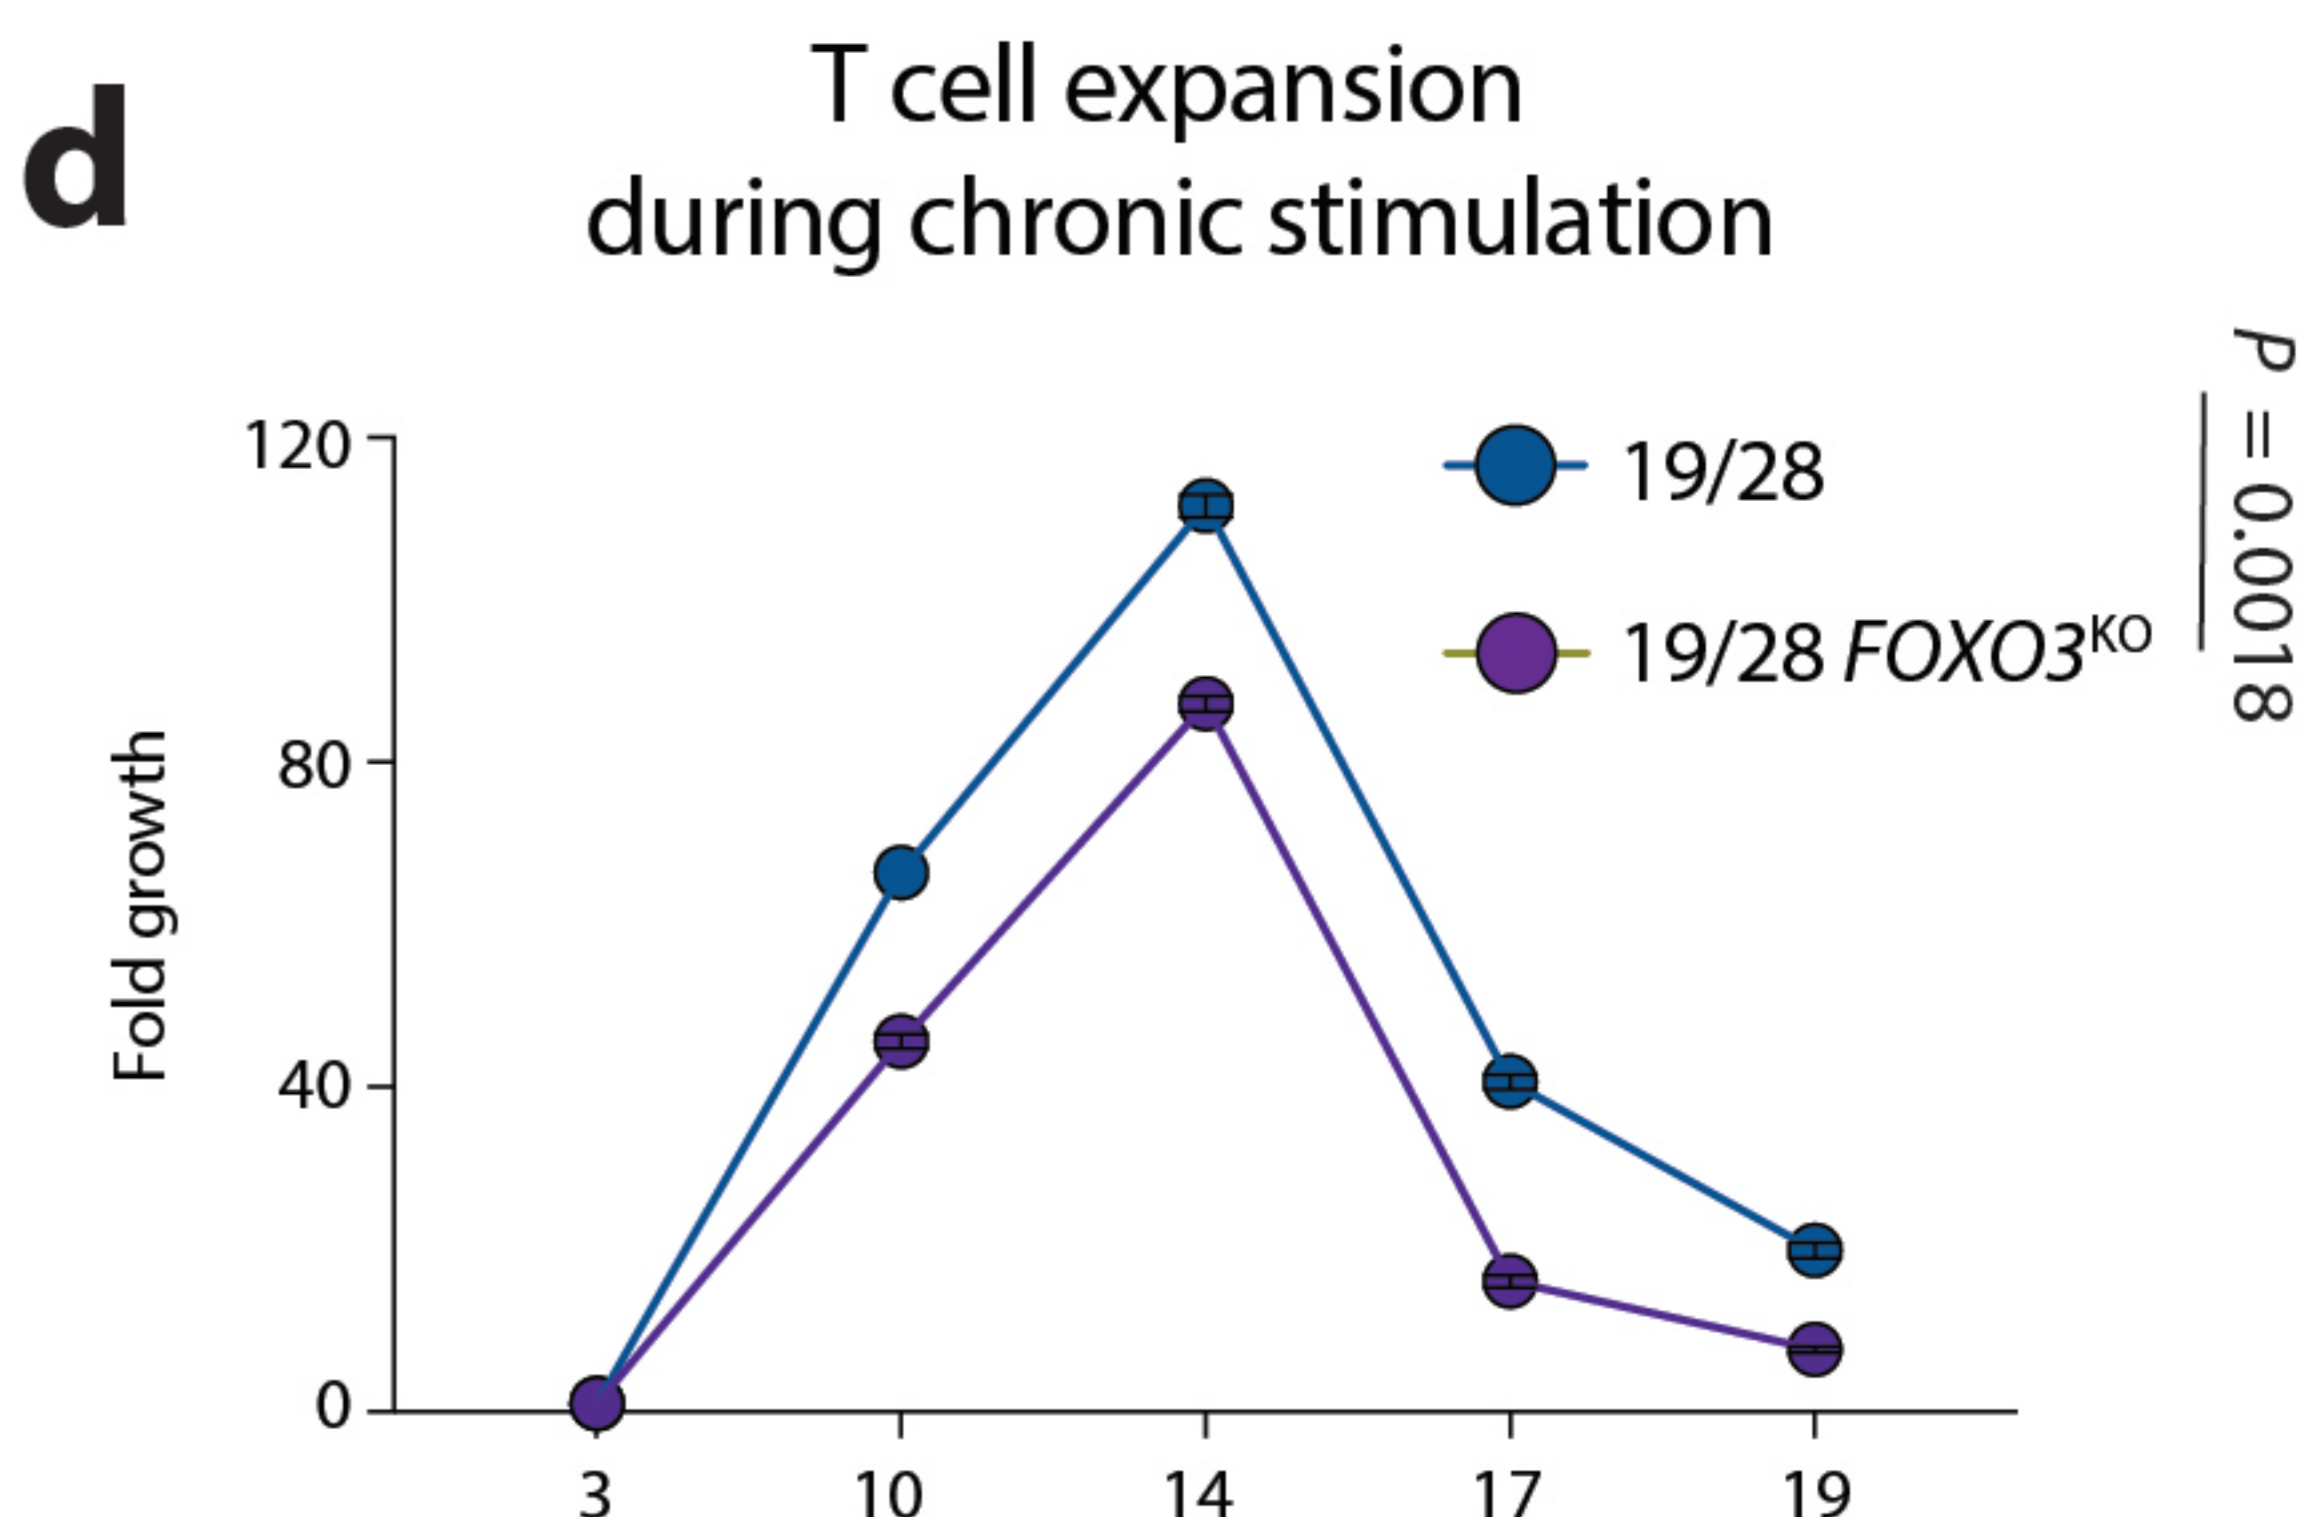

**c**

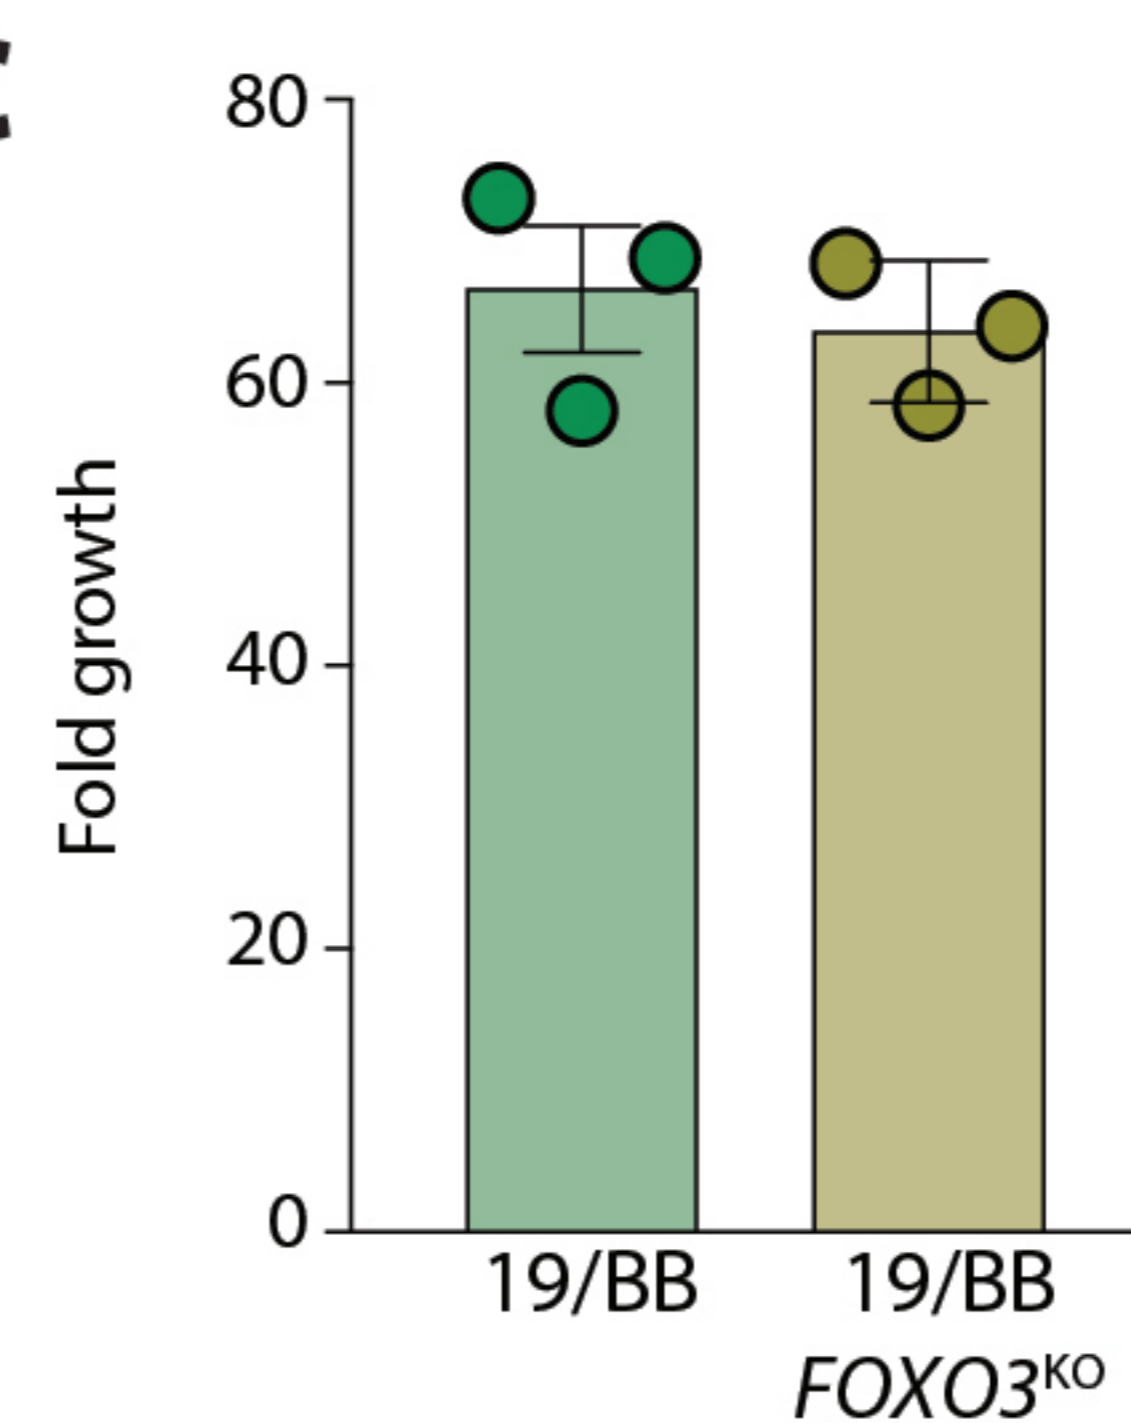

**e**

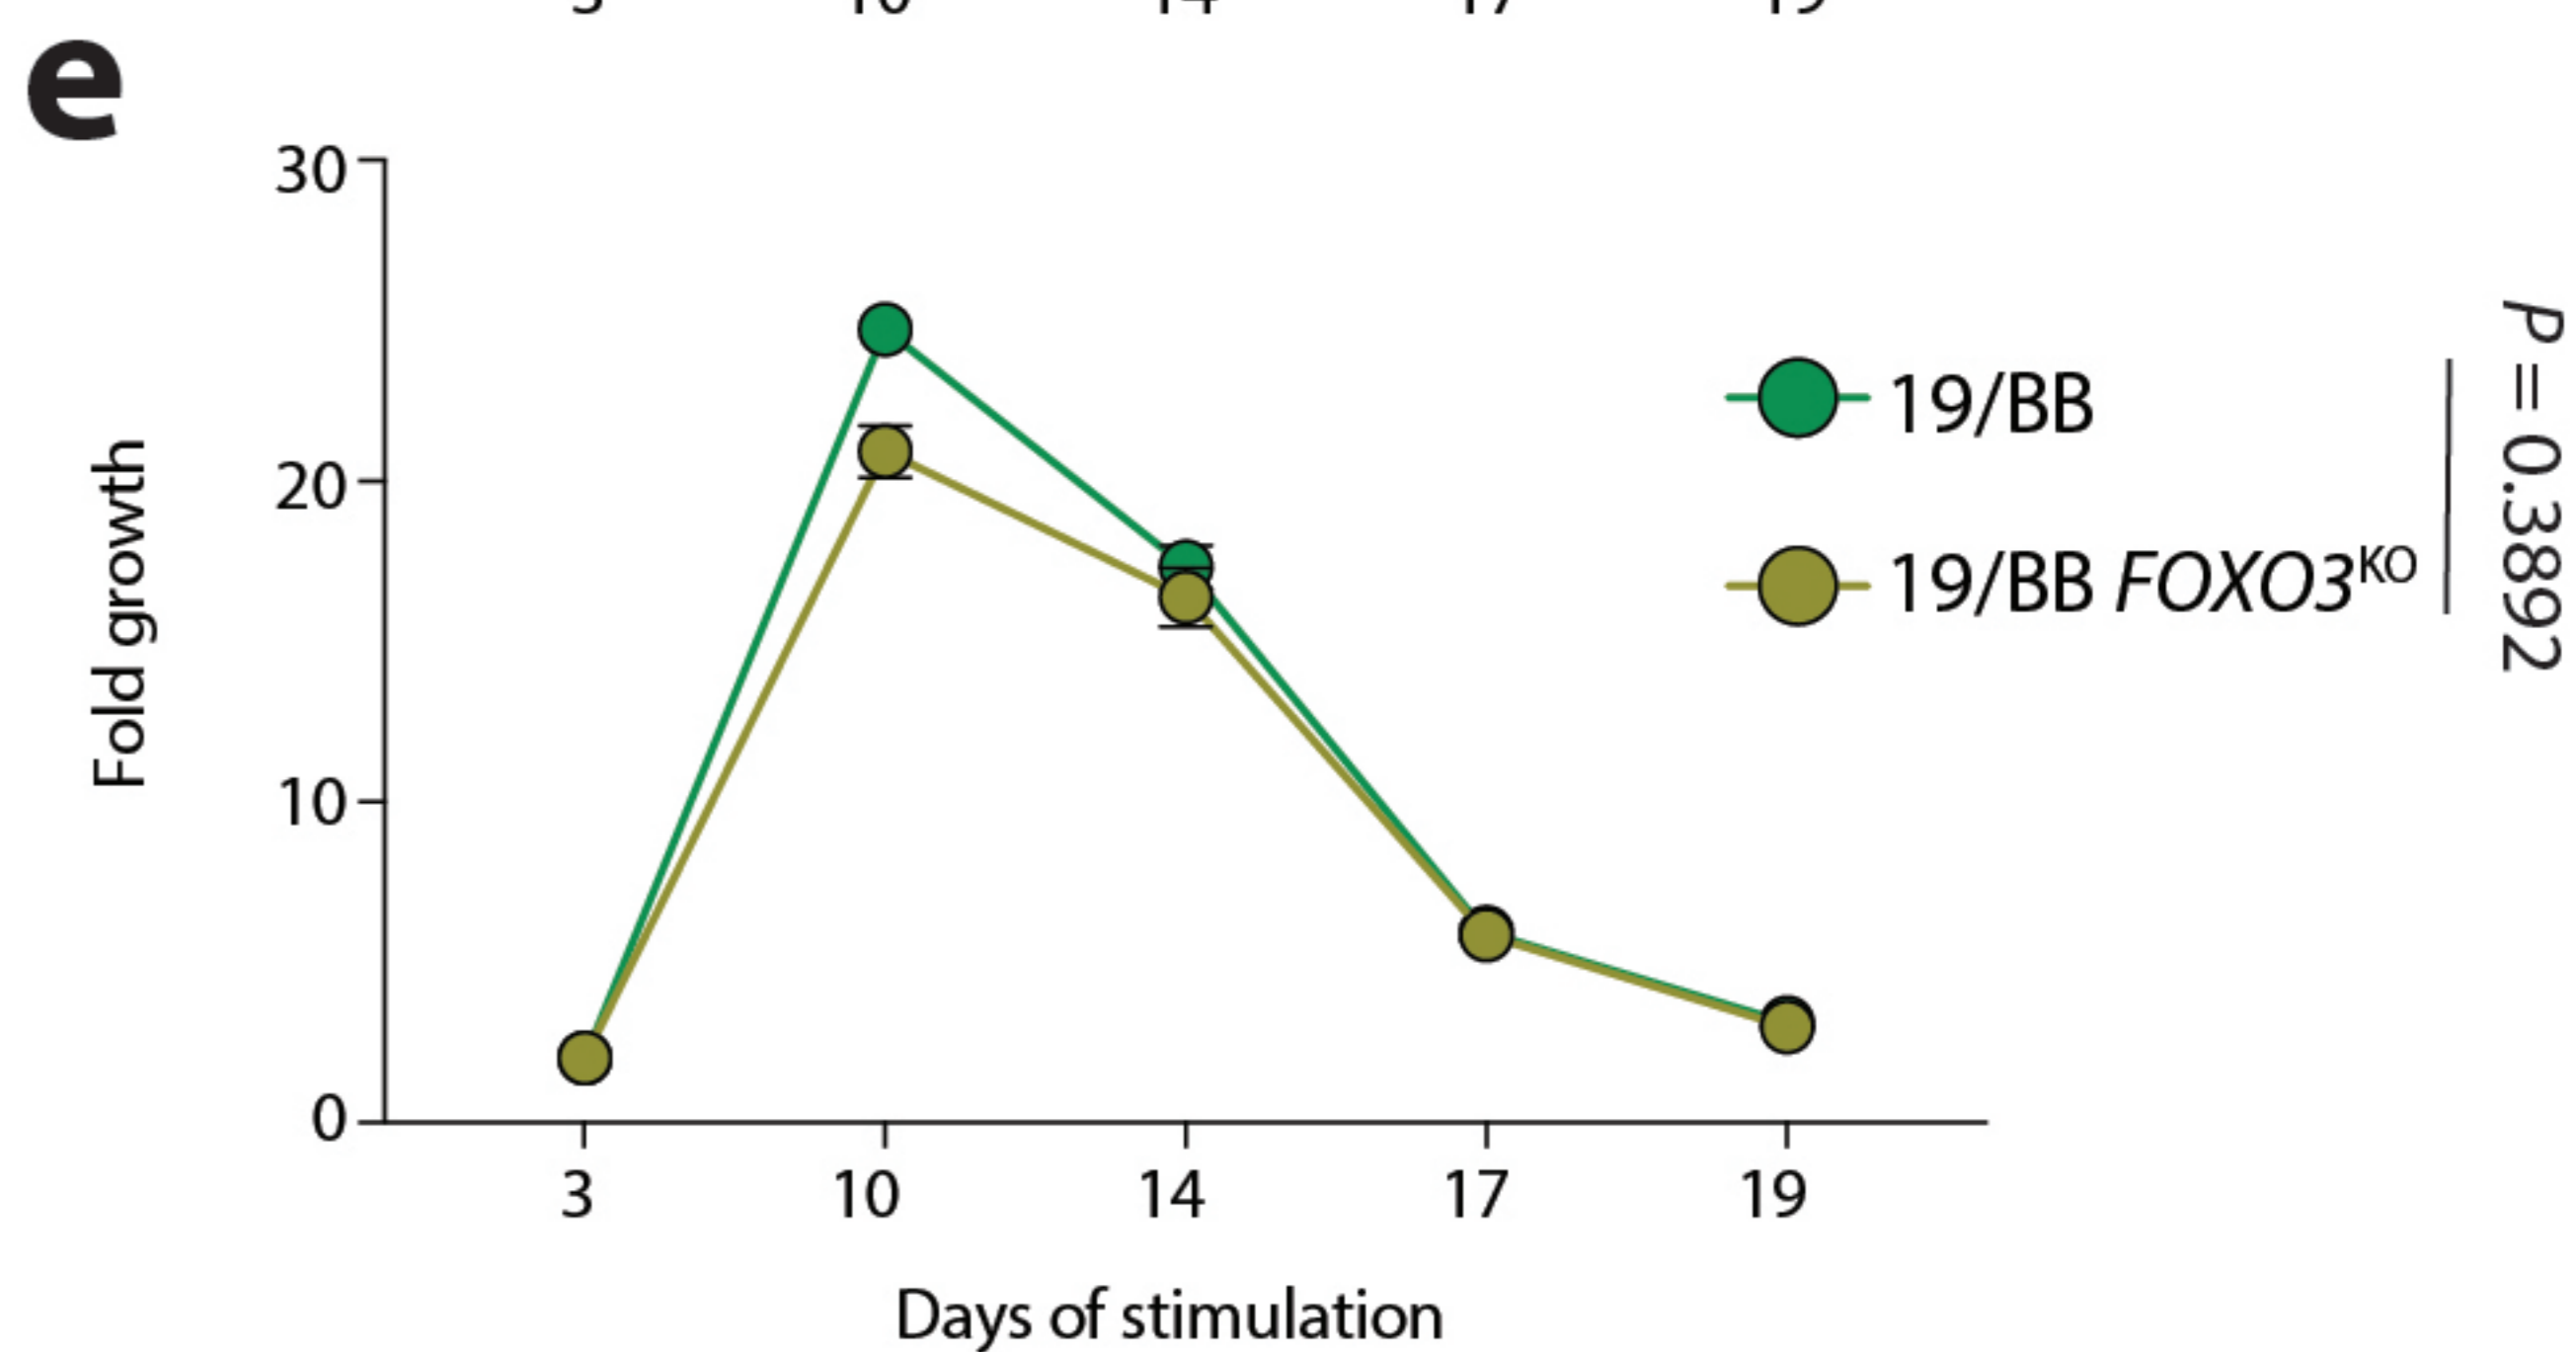

**f**

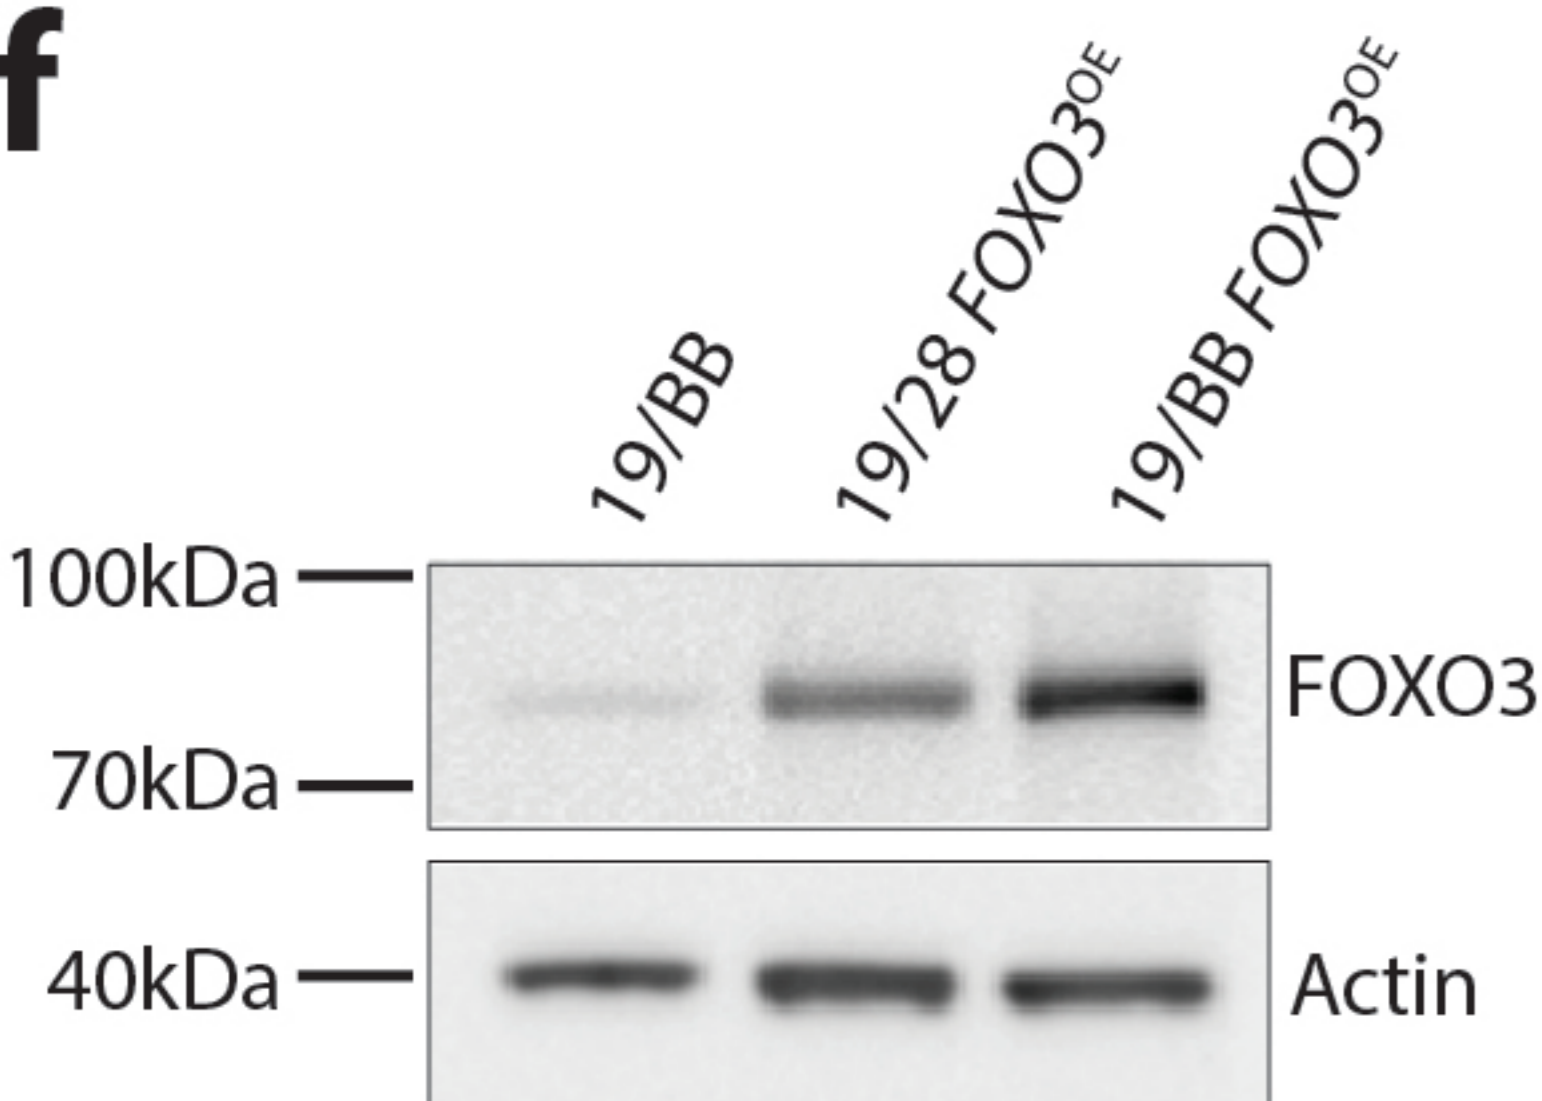

**g**

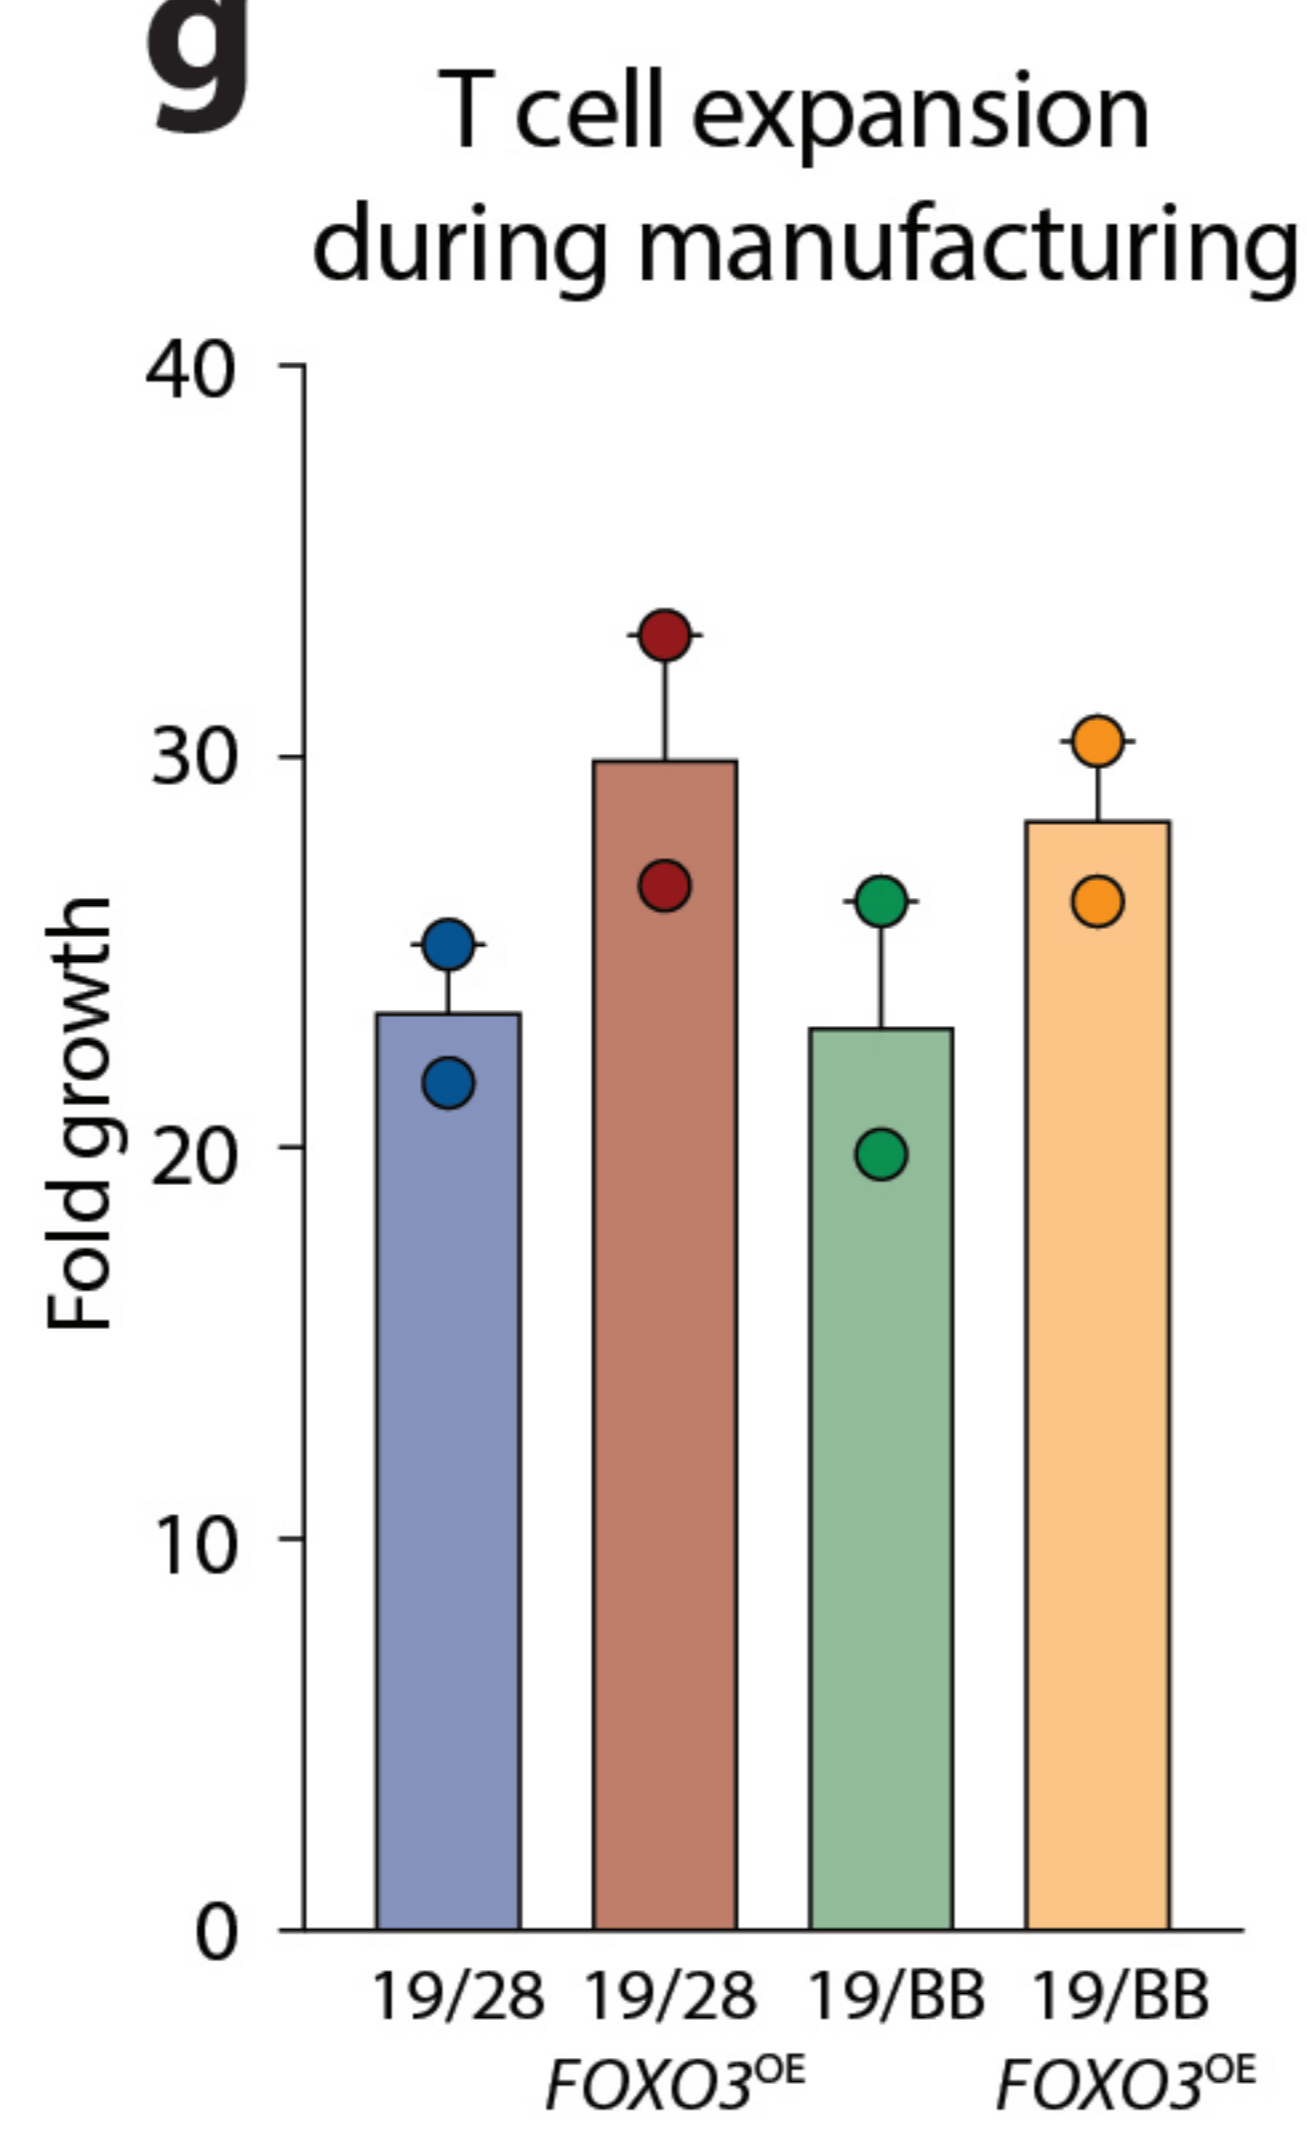

**h**

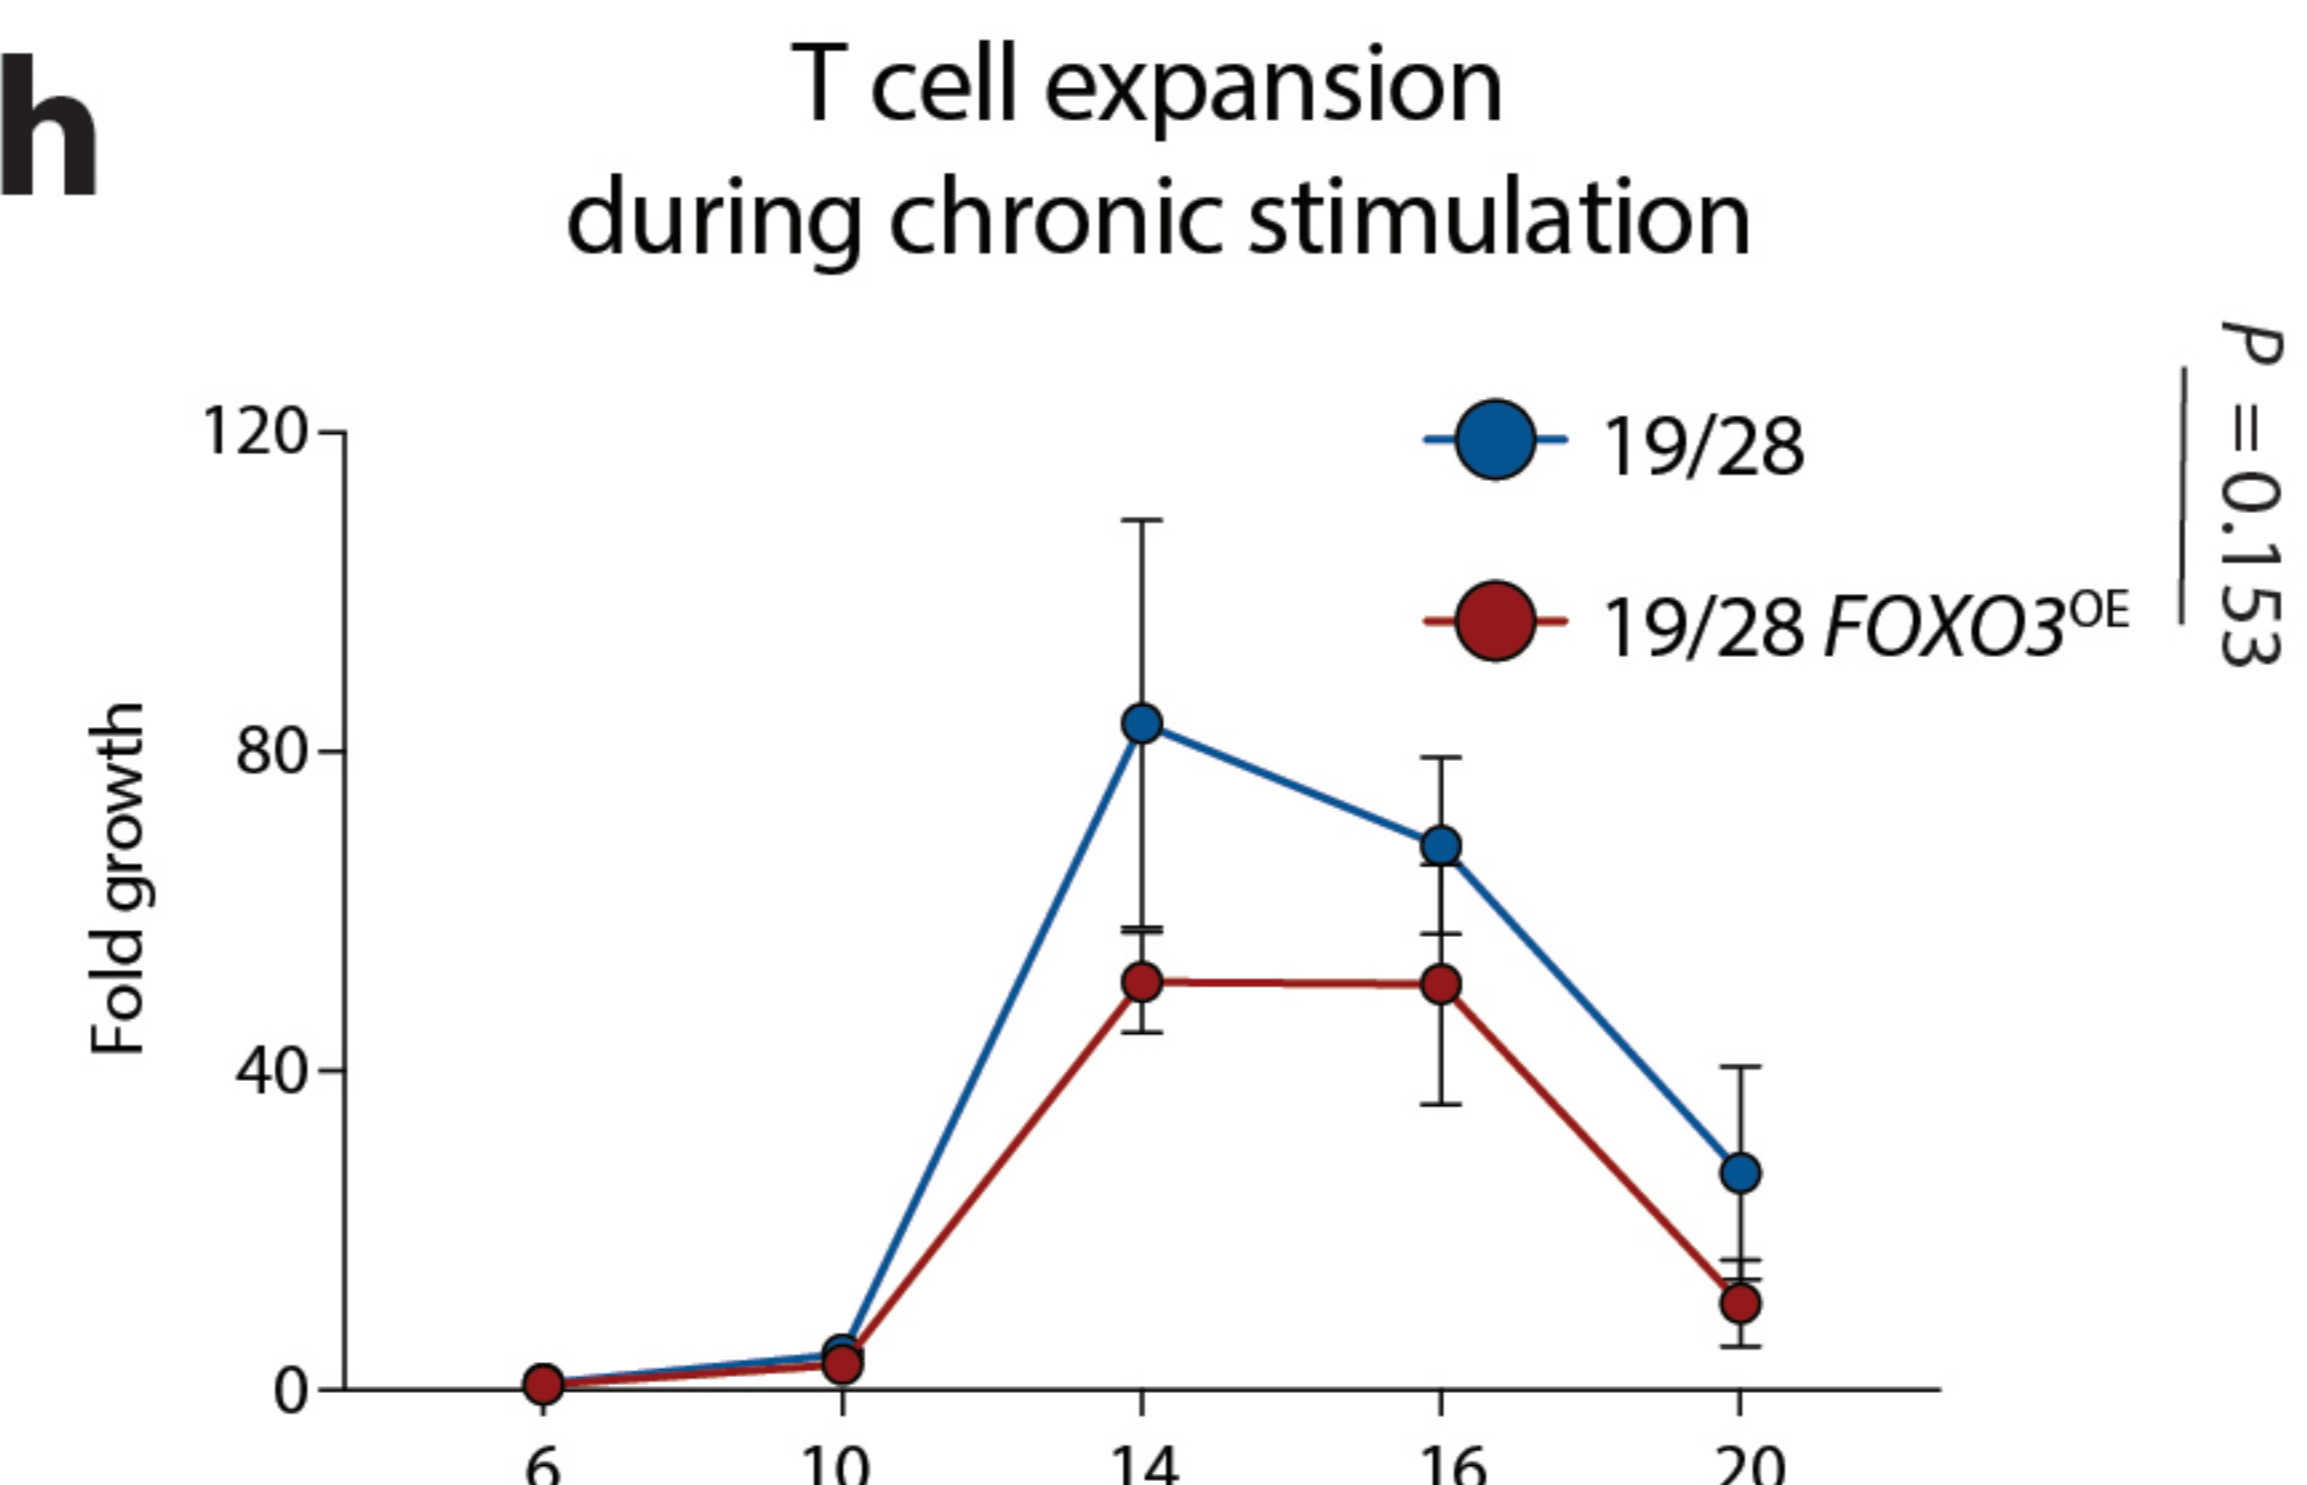

**i**

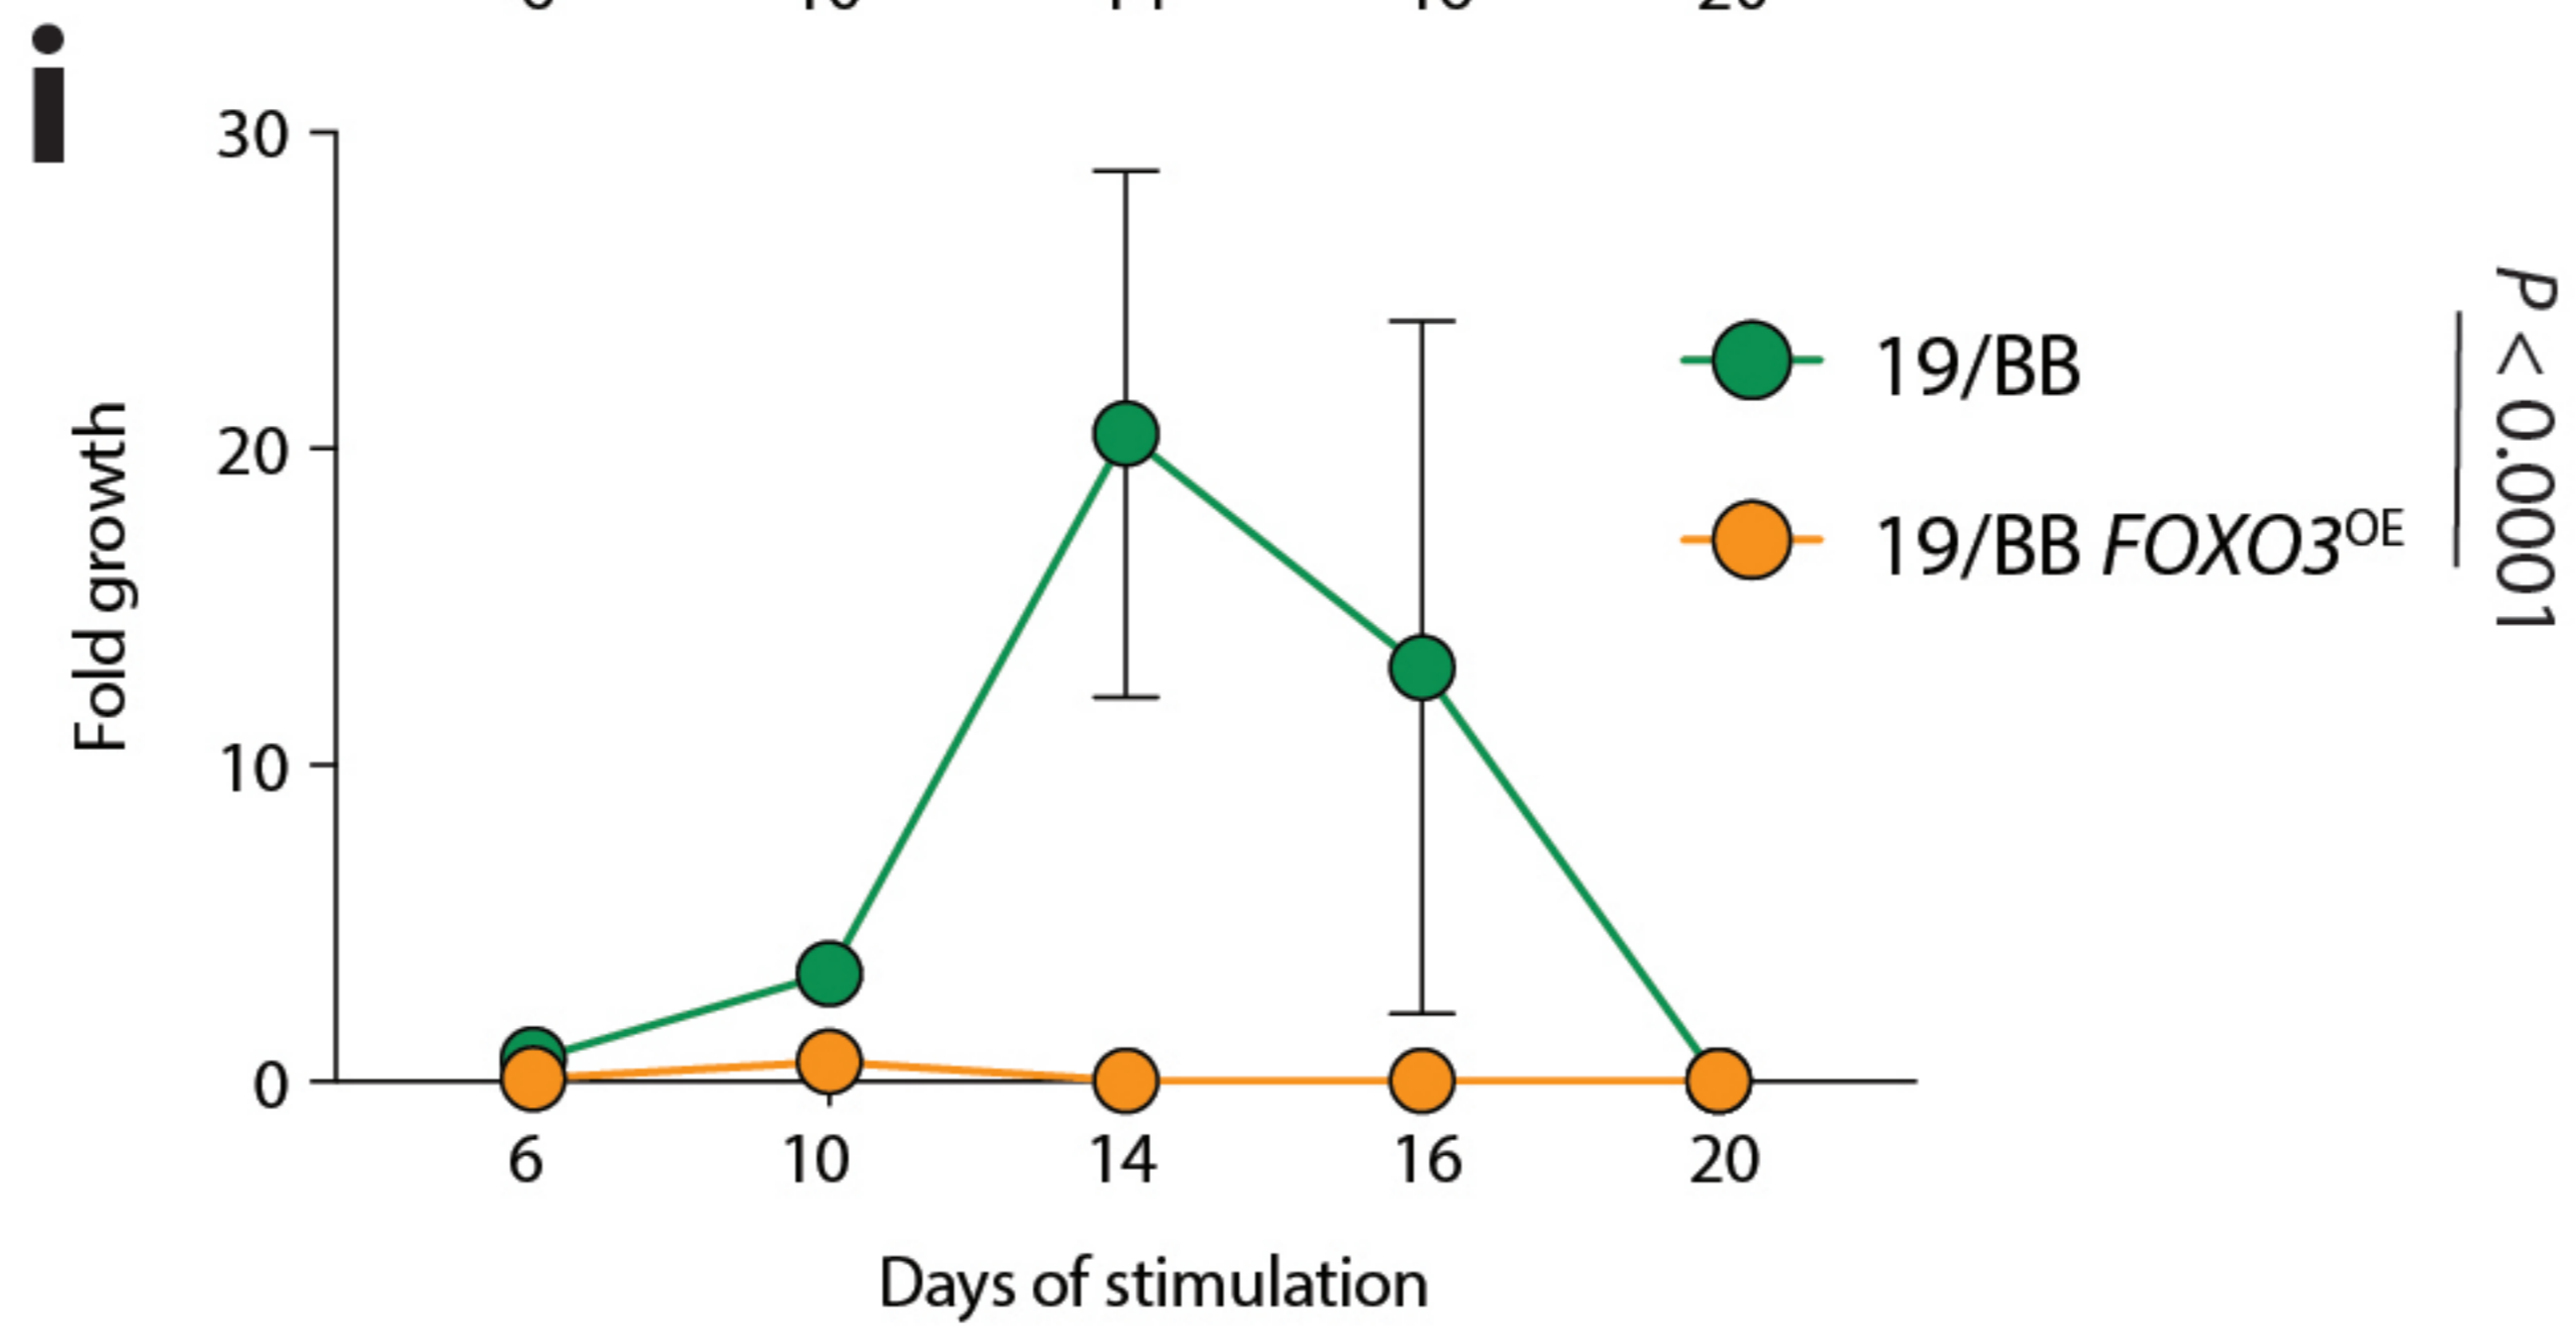

**j**

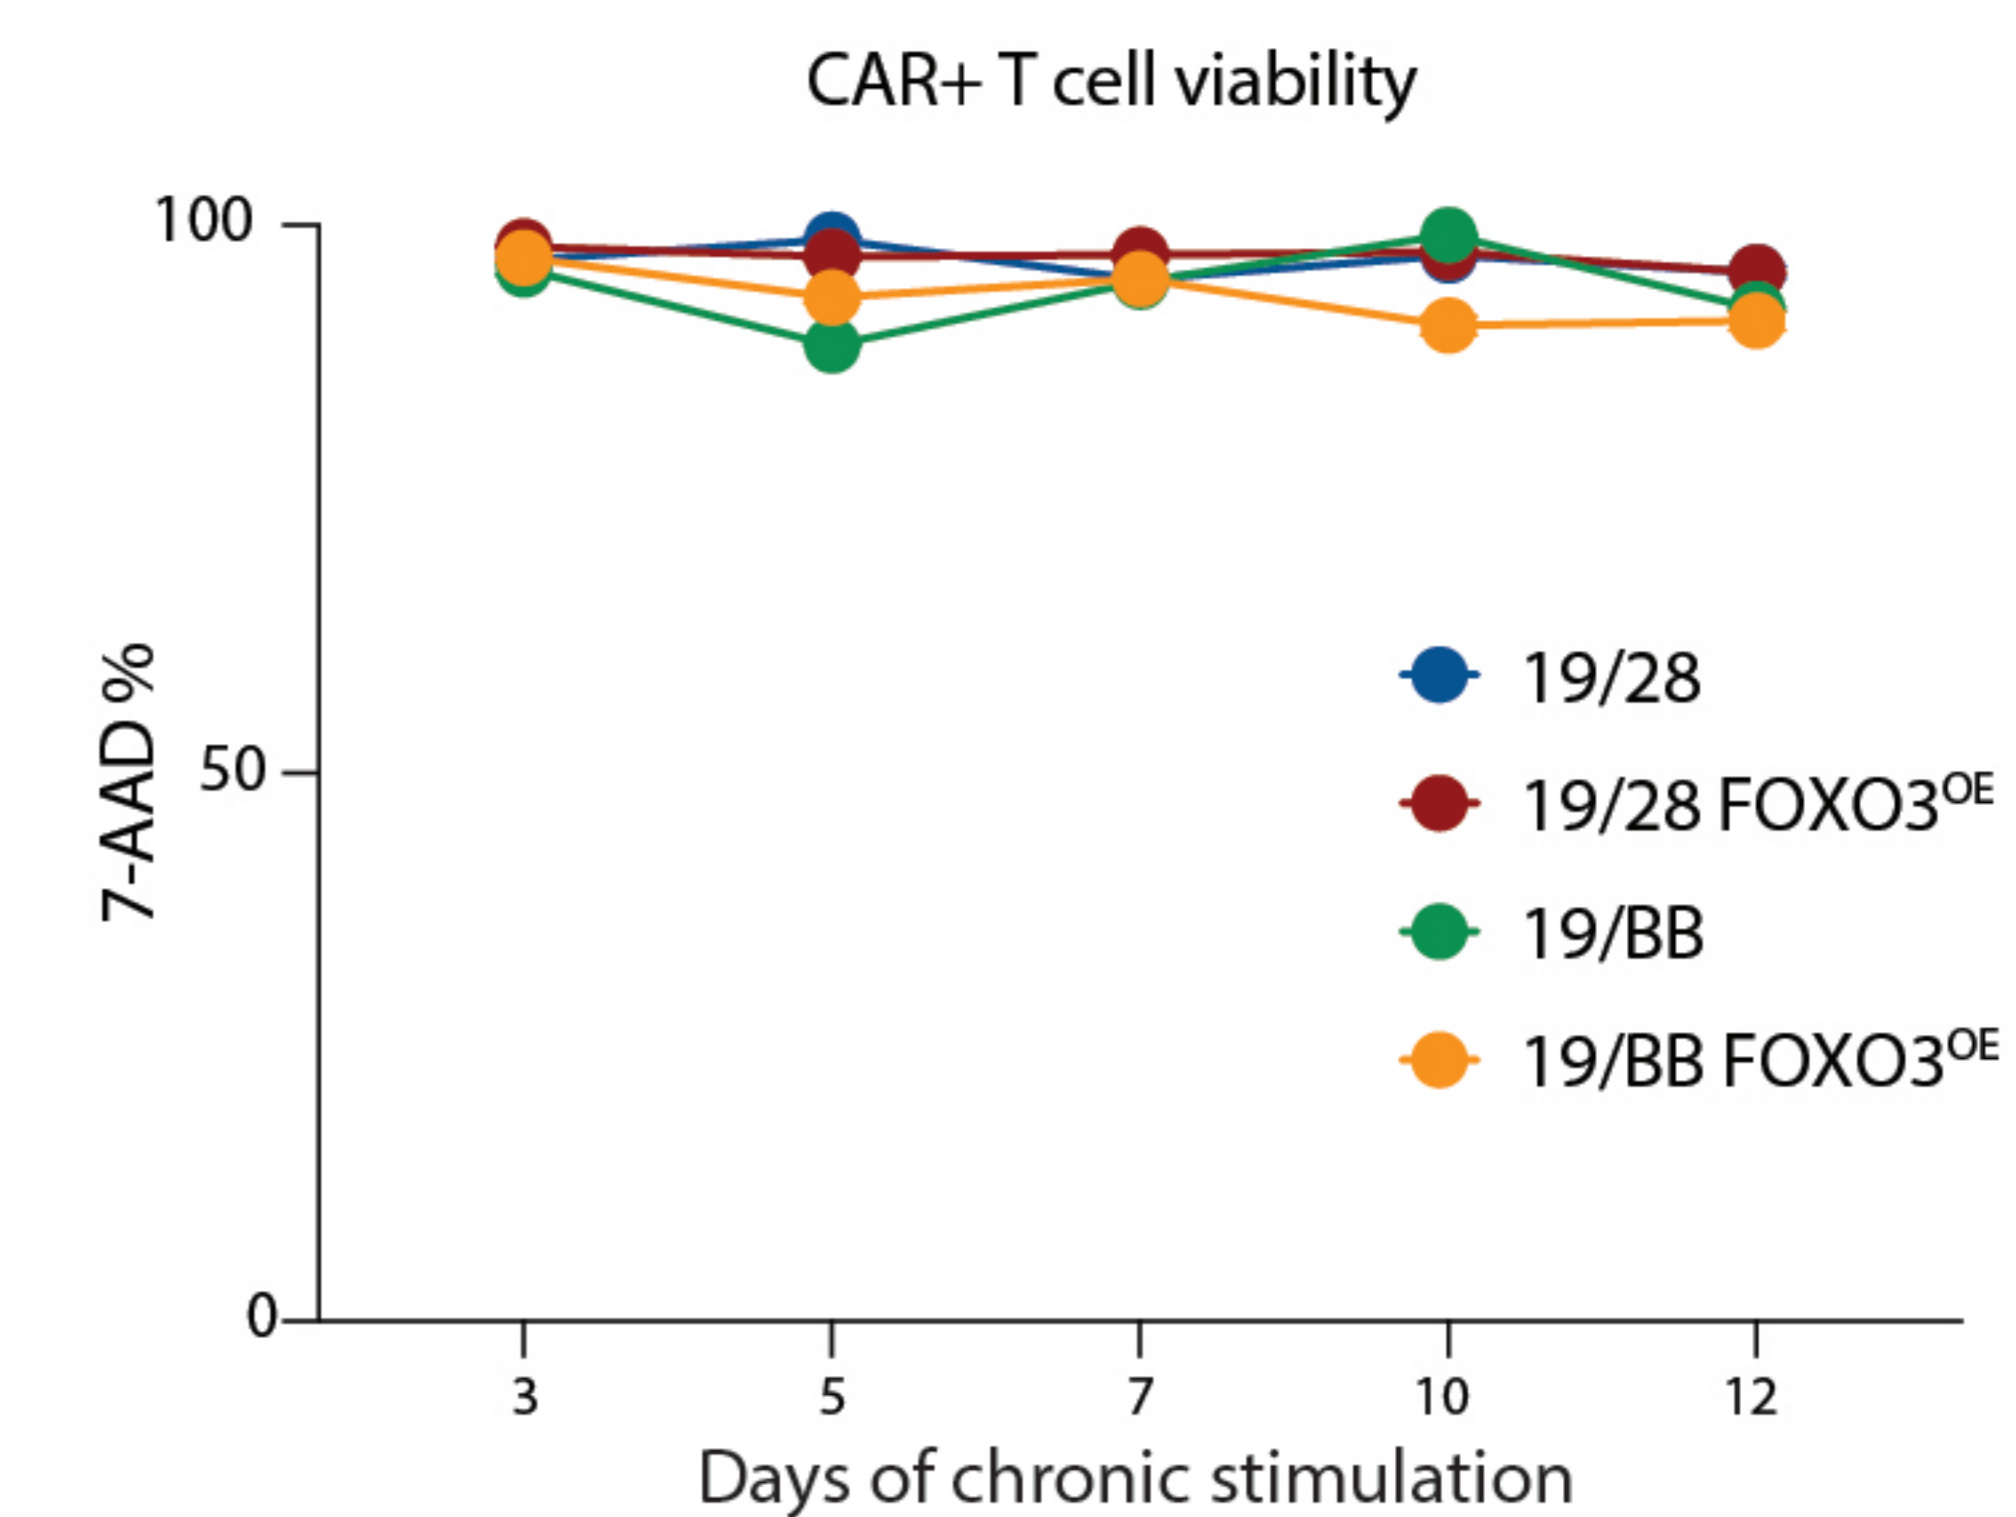

**k**

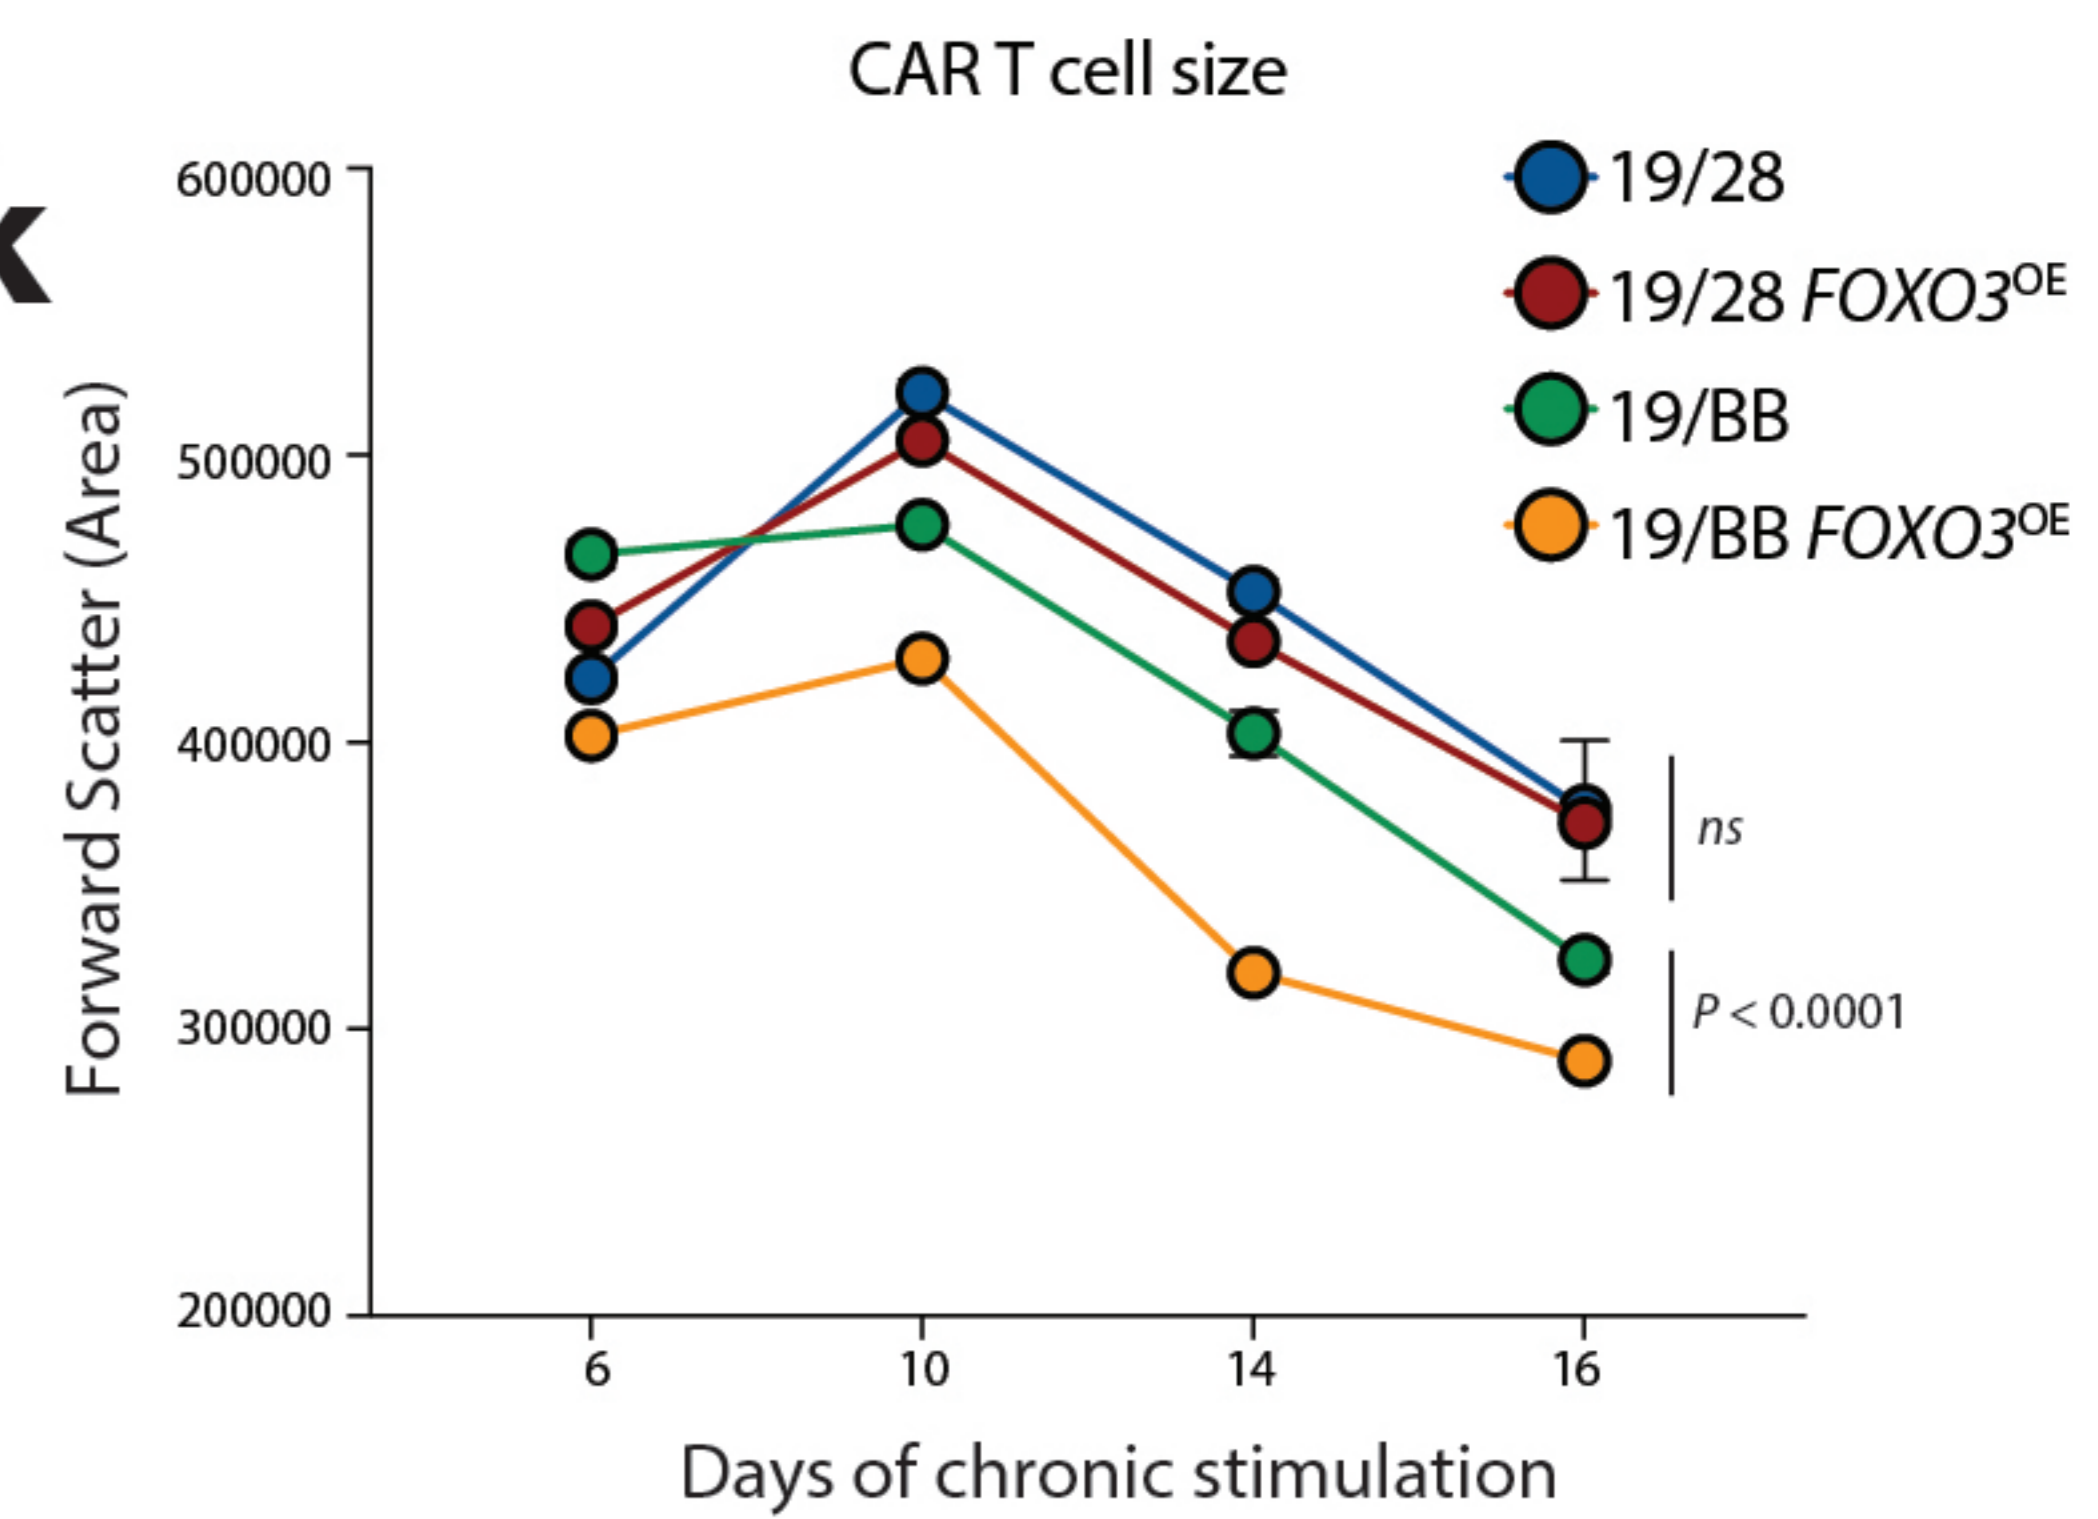

# Supplementary Figure 8

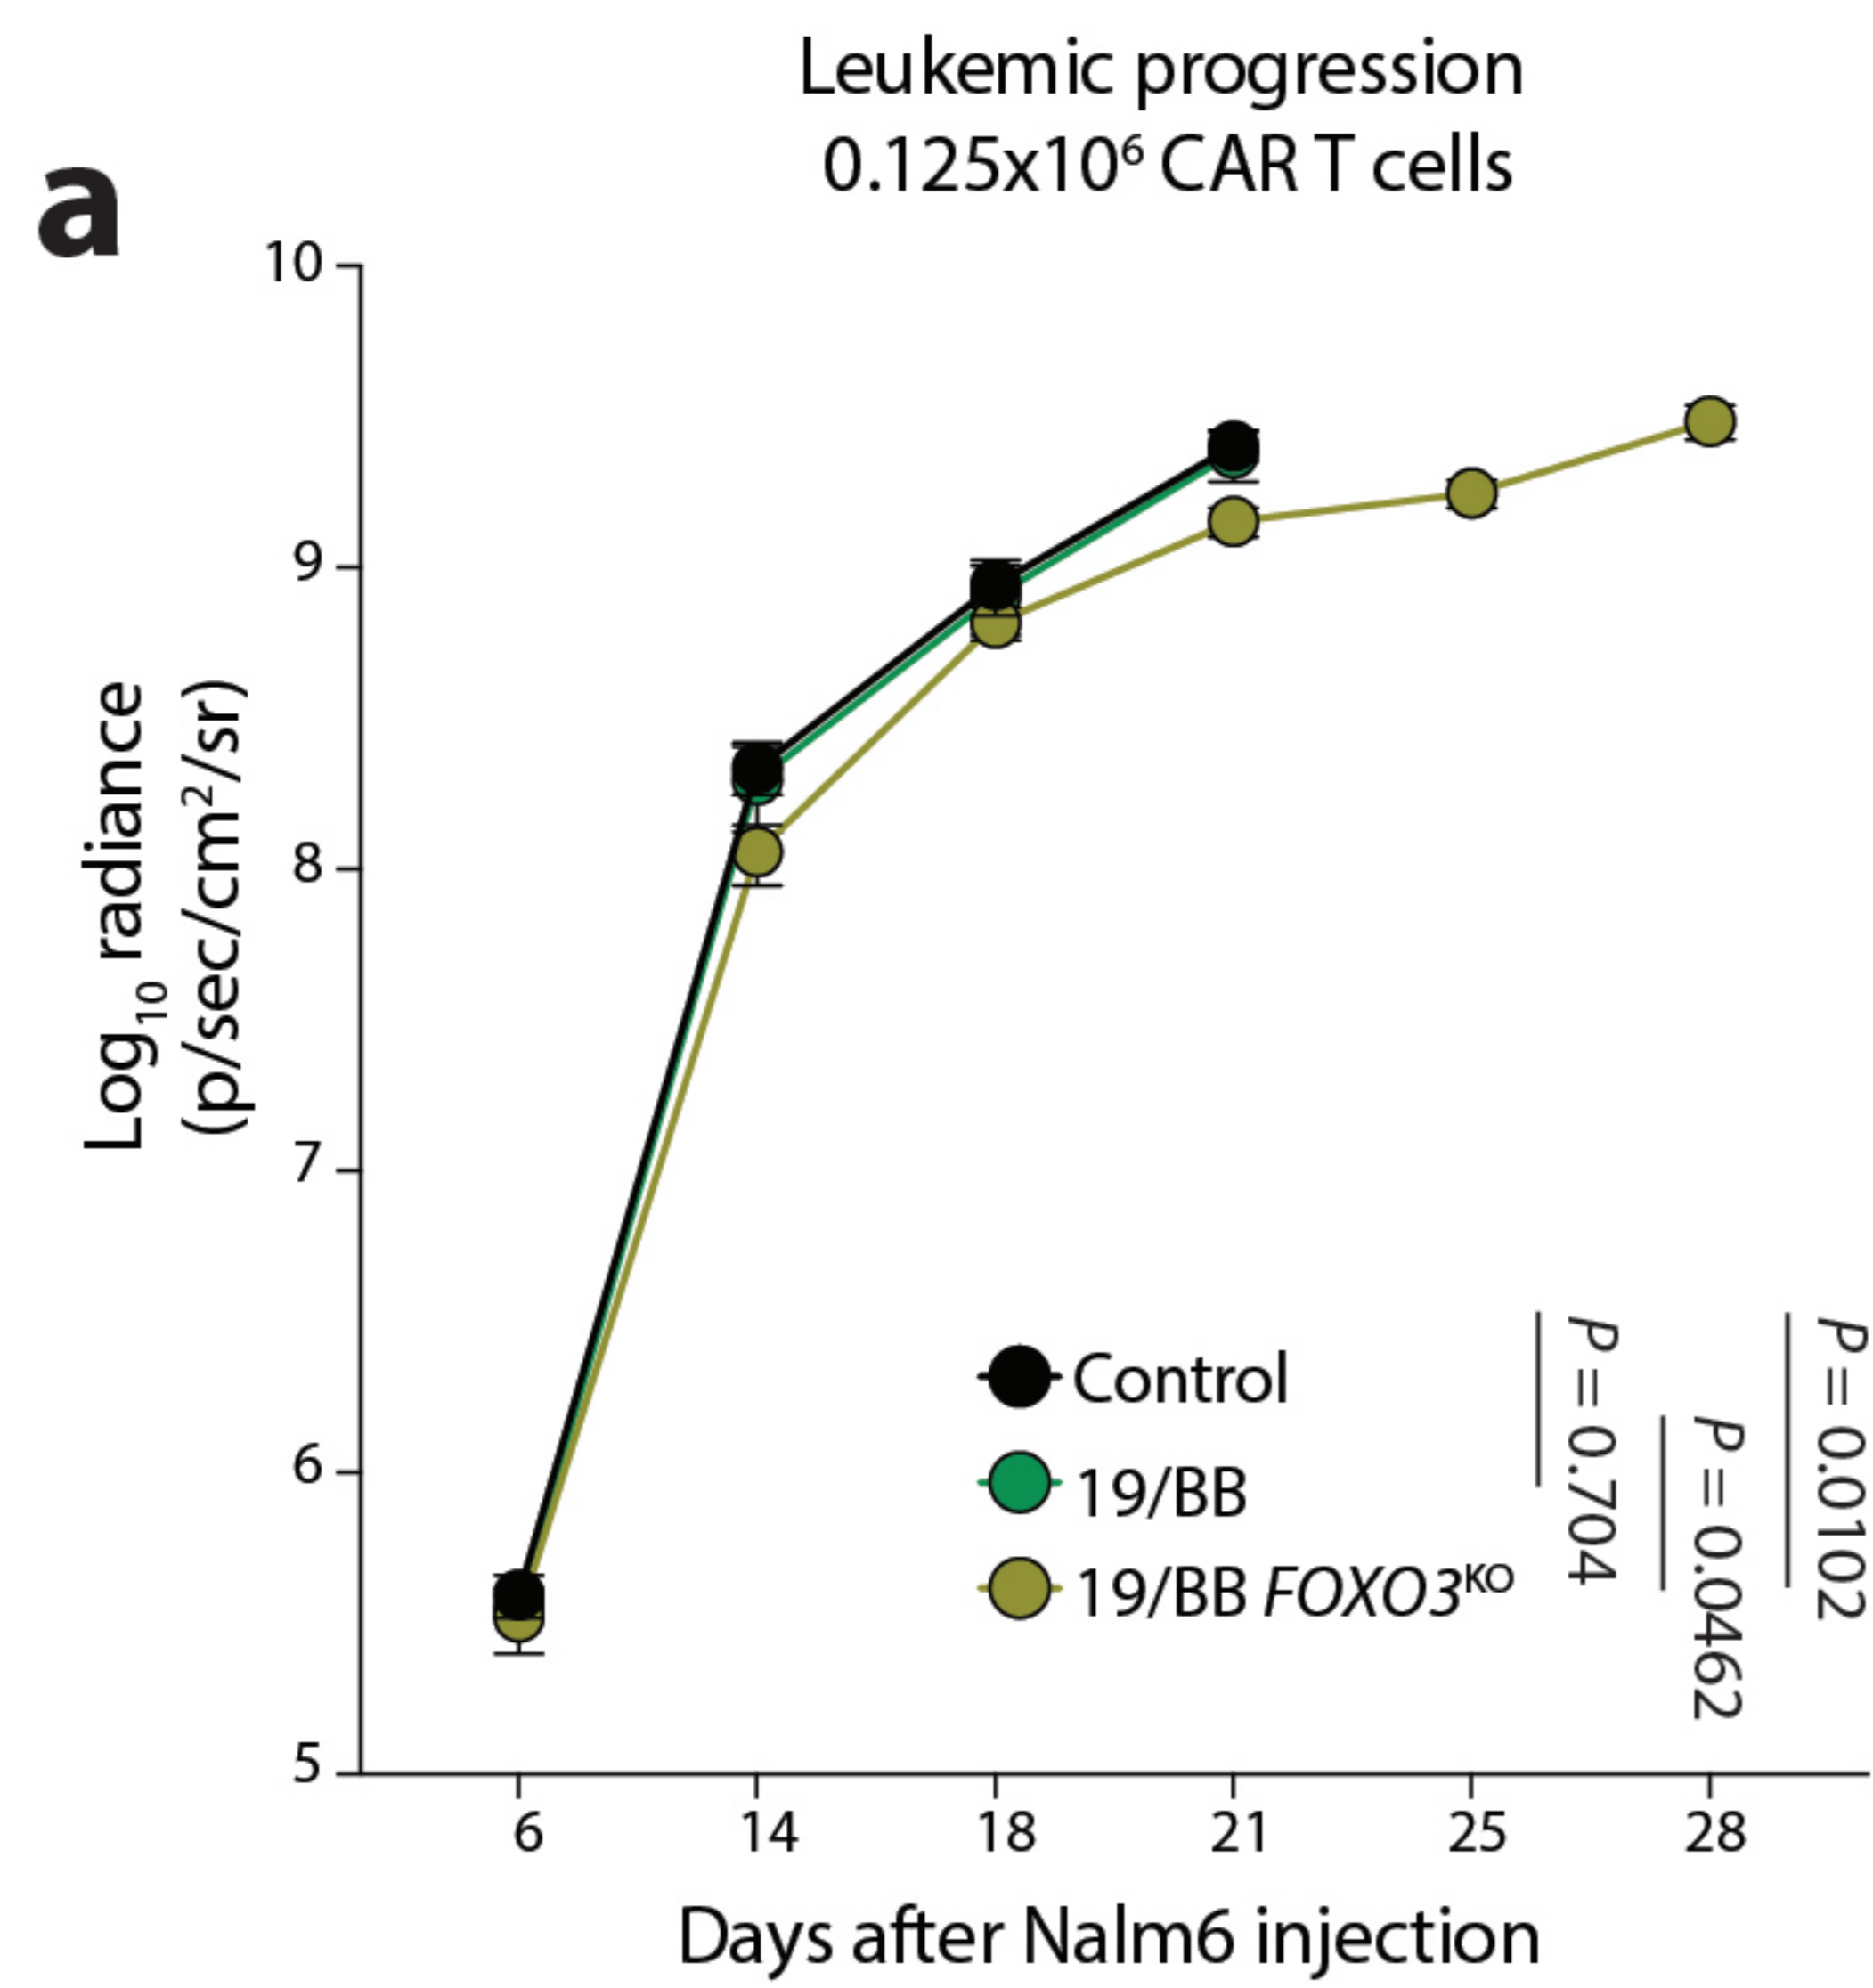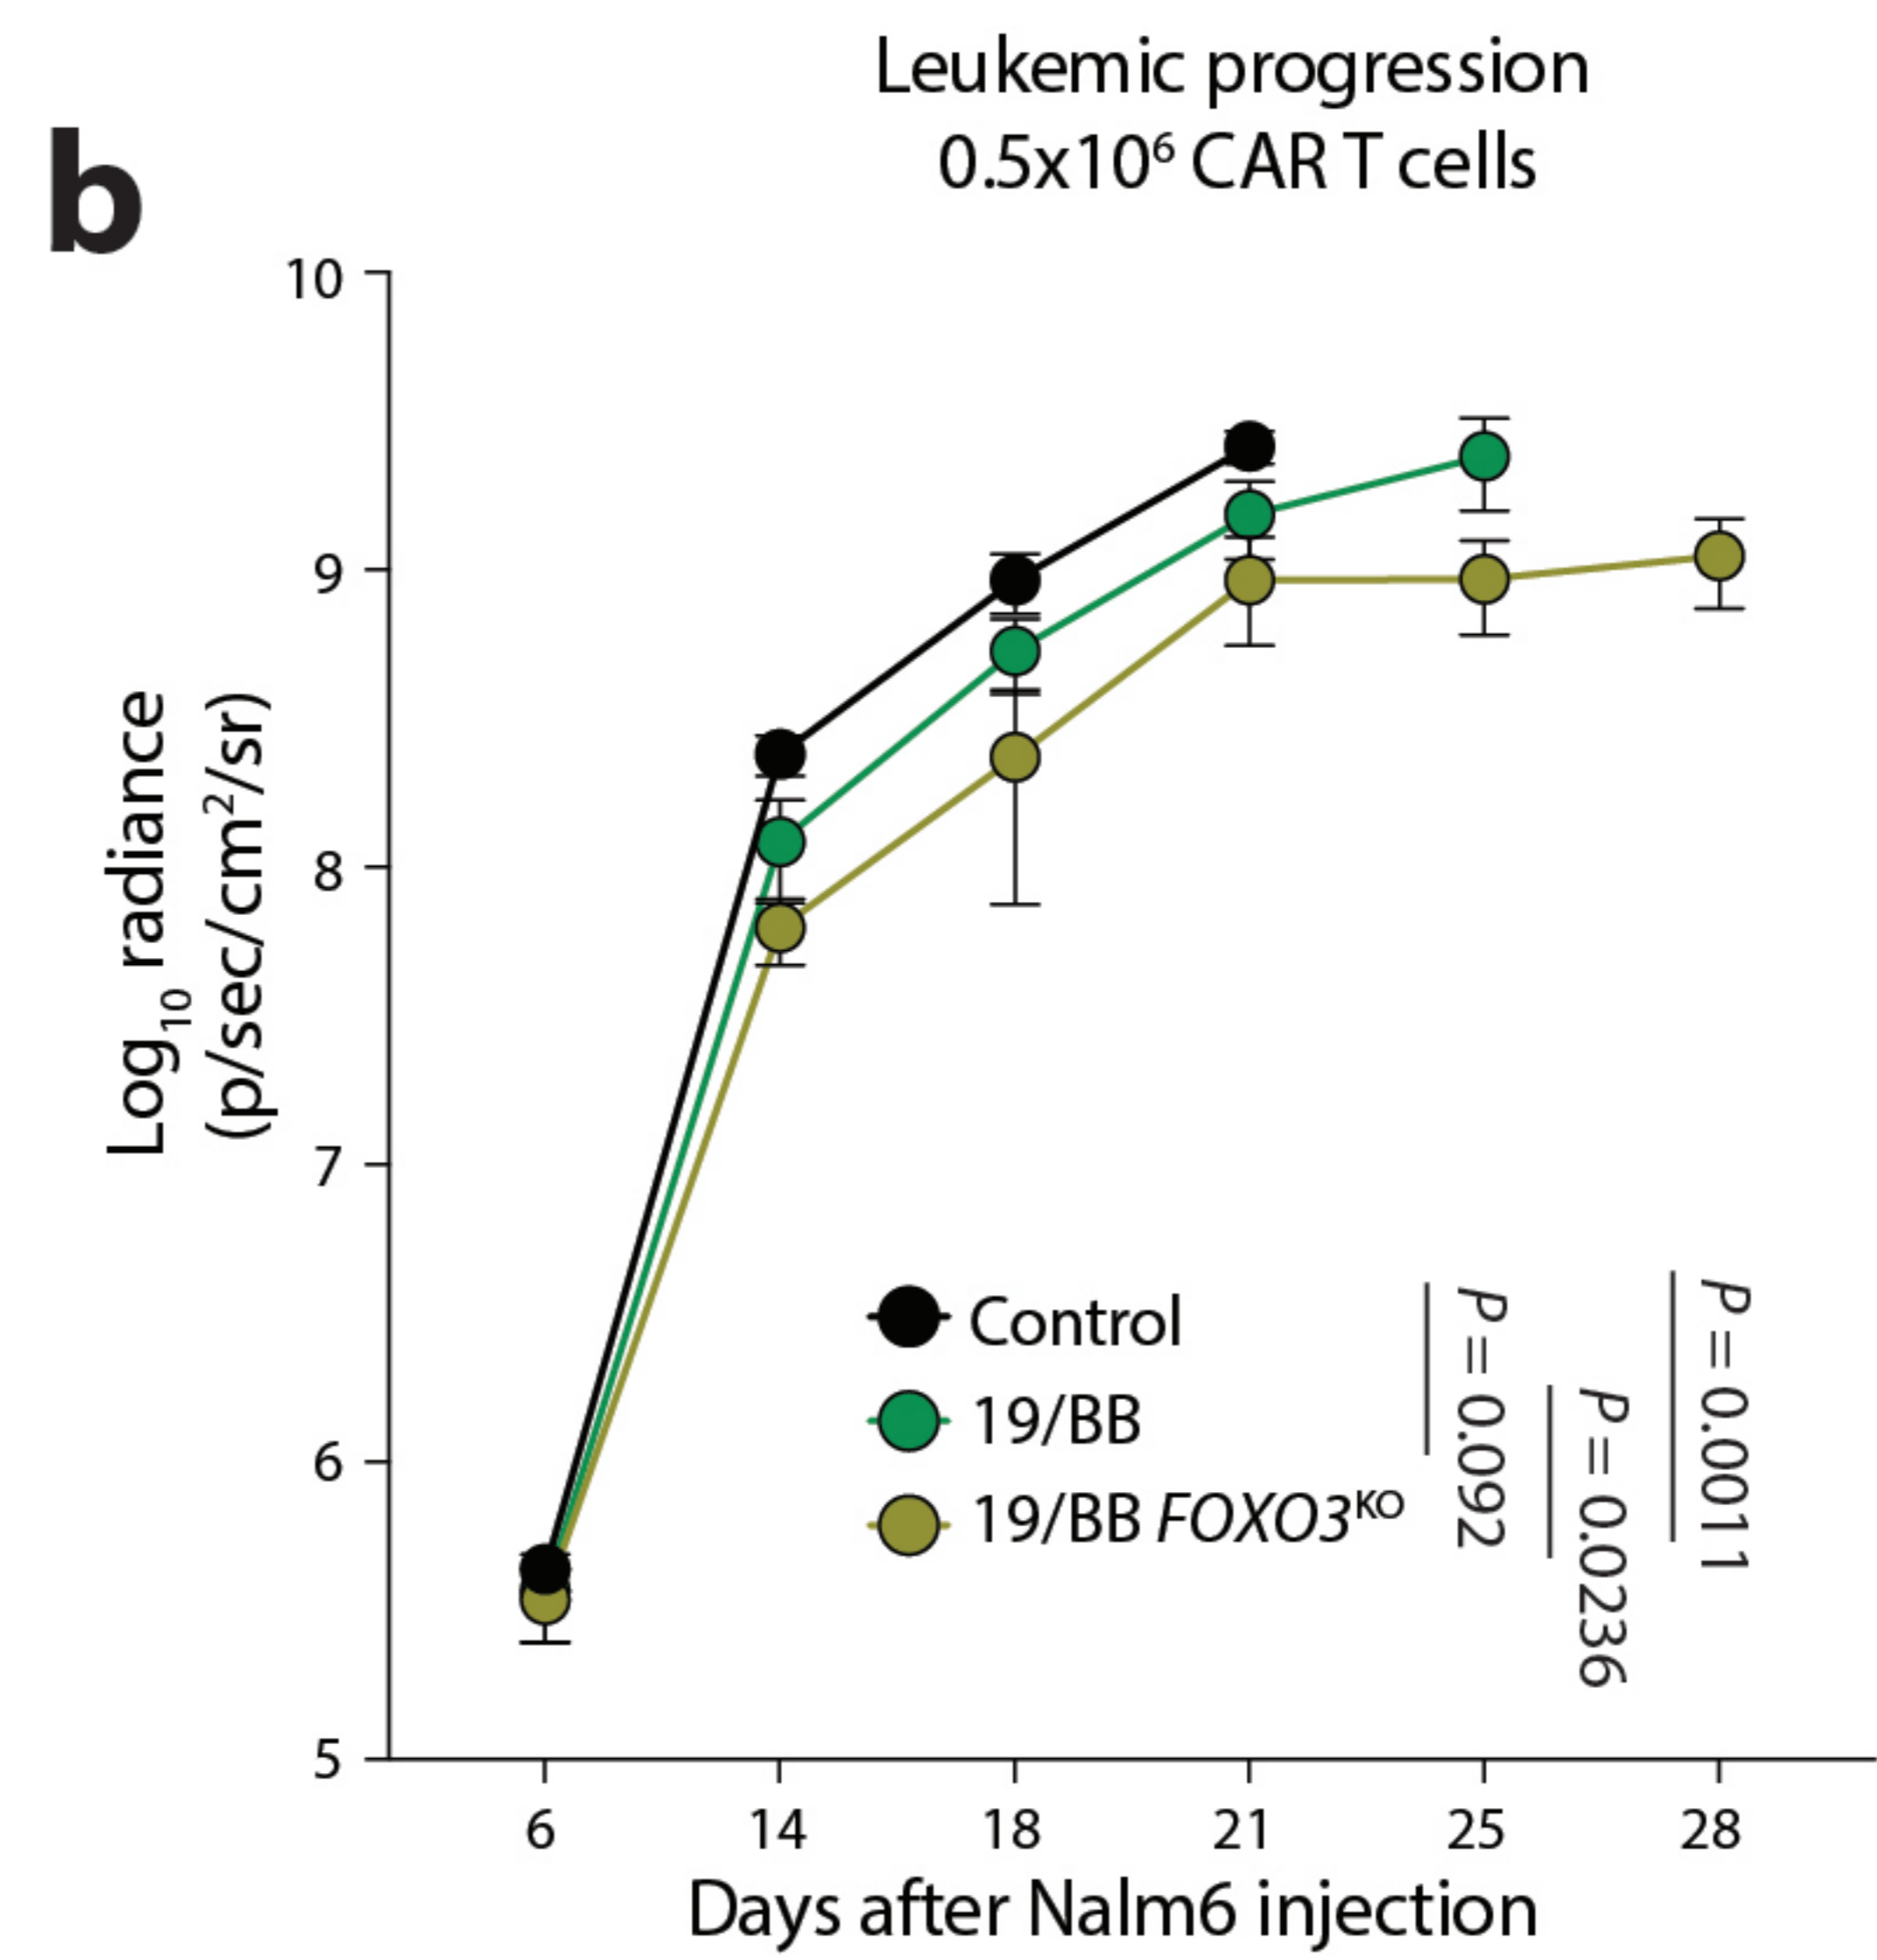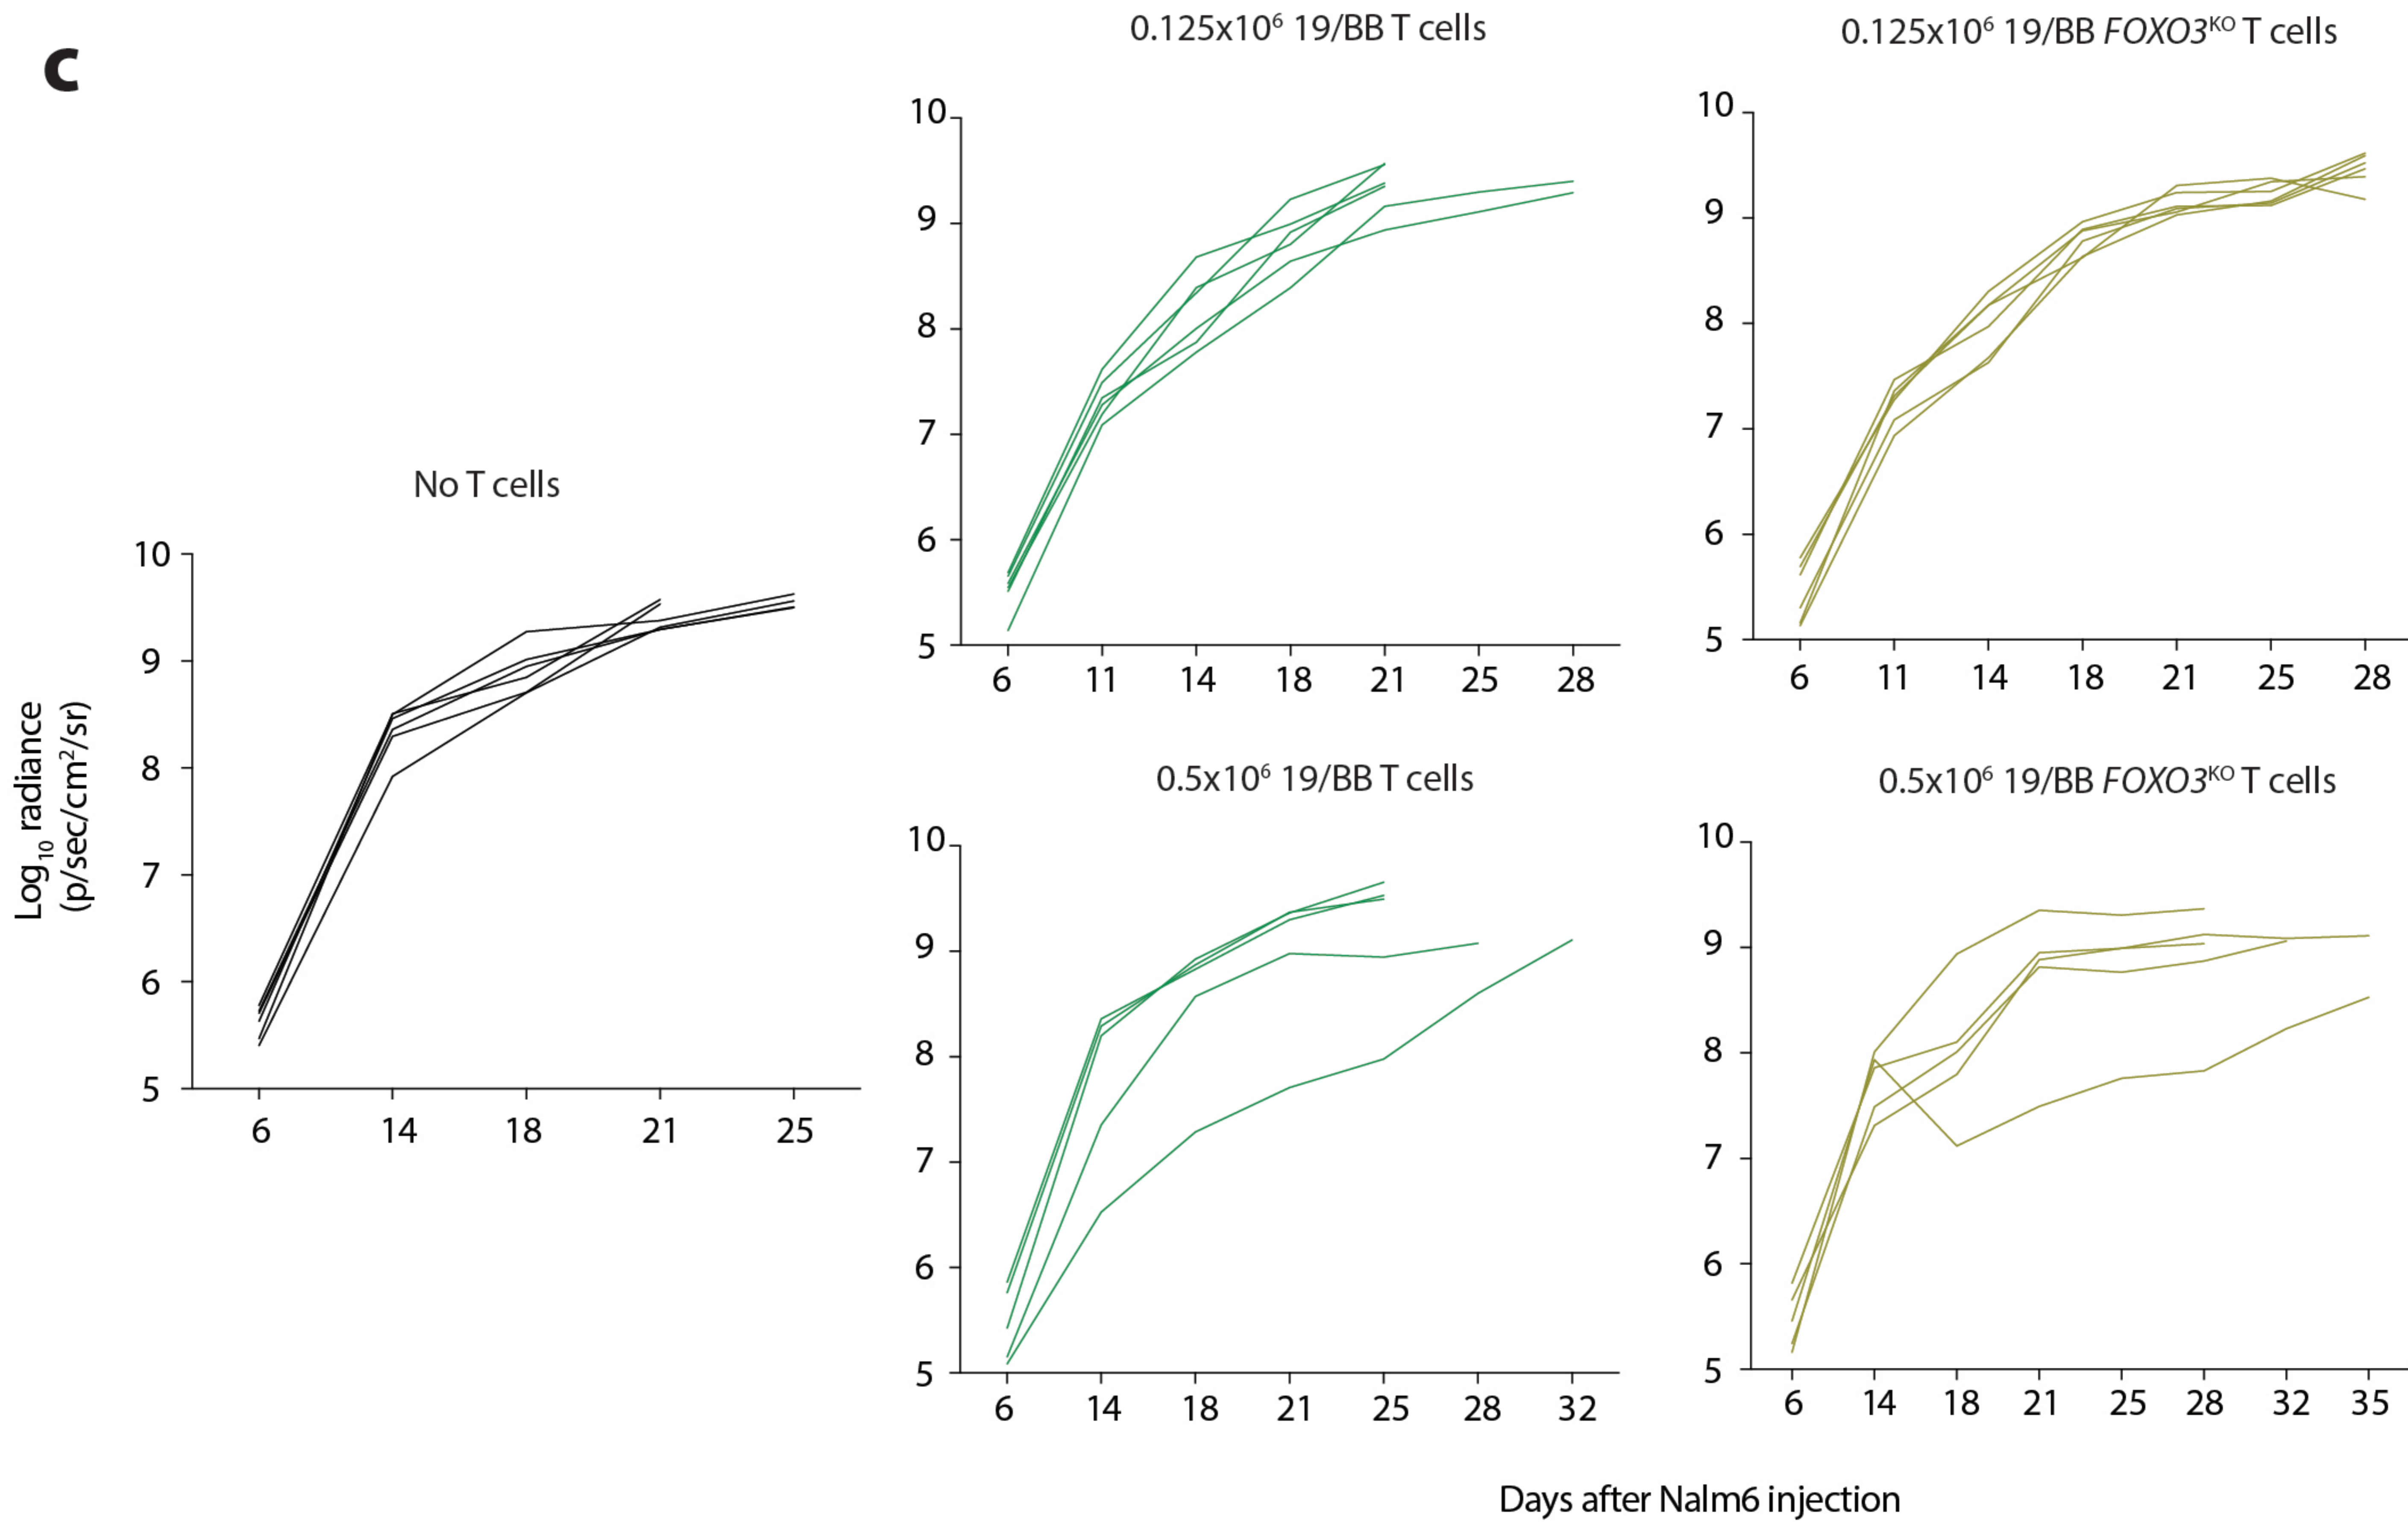

**Supplementary Table 1: CyTOF panel**

| <u>Target</u> | <u>Tag</u> | <u>Clone</u> | <u>Manufacturer</u> | <u>Catalog #</u> |
|---------------|------------|--------------|---------------------|------------------|
| CD45          | 089Y       | HI30         | Fluidigm            | 3089003B         |
| Ki-67         | 115In      | 8D5          | Thermo              | MA5-15690        |
| CD3           | 141Pr      | UCHT1        | Fluidigm            | 3141019B         |
| CD28          | 142Nd      | CD28.2       | biolegend           | 302902           |
| CD45Ra        | 143Nd      | H100         | Fluidigm            | 3143006B         |
| CD69          | 144Nd      | FN50         | Fluidigm            | 3144018B         |
| CD4           | 145Nd      | RPA-T4       | Fluidigm            | 3145001B         |
| CD8a          | 146Nd      | RPA-T8       | Fluidigm            | 3146001B         |
| RORgt         | 147Sm      | AFKJS-9      | ebioscience         | 14-6988-82       |
| CD278/ICOS    | 148Nd      | C398.4A      | Fluidigm            | 3148019B         |
| CD56 (NCAM)   | 149Sm      | NCAM16.2     | Fluidigm            | 3155008B         |
| CD223/LAG-3   | 150Nd      | 11C3C65      | Fluidigm            | 3150030B         |
| CD103         | 151Eu      | Ber-ACT8     | Fluidigm            | 3151011B         |
| TCRgd         | 152Sm      | 11F2         | Fluidigm            | 3152008B         |
| CD62L         | 153Eu      | DREG56       | Fluidigm            | 3153004B         |
| TIM3          | 154Sm      | F38-2E2      | Fluidigm            | 3154010B         |
| CD27          | 155Gd      | L128         | Fluidigm            | 3158010B         |
| CXCR3         | 156Gd      | G025H7       | Fluidigm            | 3156004B         |
| CD134 (OX40)  | 158Gd      | ACT35        | Fluidigm            | 3158012B         |
| CD197 (CCR7)  | 159Tb      | G043H7       | Fluidigm            | 3159003A         |
| CD39          | 160Gd      | A1           | Fluidigm            | 3160004B         |
| Tbet          | 161Dy      | 4B10         | Fluidigm            | 3161014B         |
| FoxP3         | 162Dy      | PCH101       | Fluidigm            | 3162011A         |
| Eomes         | 163Dy      | WD1928       | ebioscience         | 14-4877-82       |
| CD357 (GITR)  | 164Dy      | 621          | biolegend           | 311602           |
| CD45RO        | 165Ho      | UCHL1        | Fluidigm            | 3149001B         |
| CD44          | 166Er      | BJ18         | Fluidigm            | 3166001B         |
| Gata3         | 167Er      | TWAJ         | Fluidigm            | 3167007A         |
| CD154 (CD40L) | 168Er      | 24-31        | Fluidigm            | 3168006B         |
| CD25 (IL-2R)  | 169Tm      | 2A3          | Fluidigm            | 3169003B         |
| CTLA-4        | 170Er      | 14D3         | Fluidigm            | 3170005B         |
| Granzyme B    | 171Yb      | GB11         | Fluidigm            | 3171002B         |
| CD38          | 172Yb      | HIT2         | Fluidigm            | 3172007B         |
| CD137/4-1BB   | 173Yb      | 4B4-1        | Fluidigm            | 3173015B         |
| CD279 (PD-1)  | 174Yb      | EH12.2H7     | Fluidigm            | 3174020B         |
| Perforin      | 175Lu      | B-D48        | Fluidigm            | 3175004B         |
| CD127         | 176Yb      | A019D5       | Fluidigm            | 3176004B         |
| TIGIT         | 209Bi      | MBSA43       | Fluidigm            | 3209013B         |



**Supplementary Table 2: Human T cell exhaustion genesets**

| Li Cell 2019 | Guo Nature Med 2018 | Zheng Cell 2017 | Zhang Nature 2018 | Present in >2 |
|--------------|---------------------|-----------------|-------------------|---------------|
| ABI3         | ACP5                | ACP5            | ACP5              | ACP5          |
| ADAM28       | ALOX5AP             | ADGRG1          | AFAP1L2           | AFAP1L2       |
| AFAP1L2      | ANXA5               | AFAP1L2         | ANXA5             | AKAP5         |
| AKAP5        | APOBEC3C            | AKAP5           | APOBEC3C          | ANXA5         |
| ANAPC1P1     | ATP6V1C2            | BST2            | APOBEC3G          | APOBEC3C      |
| ANLN         | BHLHE40-AS1         | CCL3            | BATF              | BST2          |
| AOAH         | BST2                | CCND2           | BST2              | CCL3          |
| APOBEC3B     | BTLA                | CD27            | CCL3              | CCL4          |
| ASF1B        | CCL3                | CD27-AS1        | CCL4              | CCL4L1        |
| ASPM         | CCL4                | CD2BP2          | CCL4L1            | CCND2         |
| ATP8B4       | CCND2               | CD38            | CCR1              | CCR1          |
| AURKB        | CD200               | CD63            | CD27              | CD200         |
| BIRC5        | CD27                | CHST12          | CD27-AS1          | CD27          |
| BTBD16       | CD27-AS1            | CREM            | CD38              | CD27-AS1      |
| BUB1         | CD38                | CSF1            | CD63              | CD38          |
| BUB1B        | CD63                | CTLA4           | CD82              | CD63          |
| C16orf45     | CD7                 | CTSD            | COX5A             | CD82          |
| C2orf48      | CD82                | CXCL13          | CTLA4             | COX5A         |
| CADM1        | CDK2AP2             | CXCR6           | CTSD              | CSF1          |
| CCL3         | CKS2                | DFNB31          | CTSW              | CTLA4         |
| CCL3L1       | COTL1               | DUSP4           | CXCL13            | CTSD          |
| CCL3L3       | COX5A               | ENTPD1          | CXCR6             | CTSW          |
| CCL4         | CREG1               | ENTPD1-AS1      | DUSP4             | CXCL13        |
| CCL4L1       | CTLA4               | FKBP1A          | ENTPD1            | CXCR6         |
| CCL5         | CTSD                | FUT8            | FASLG             | DUSP4         |
| CCNB1        | CXCL13              | GALM            | FKBP1A            | ENTPD1        |
| CCNB2        | CXCR6               | GZMB            | FKBP1A-SDCBP2     | FASLG         |
| CCR1         | DDIT4               | HAVCR2          | FUT8              | FKBP1A        |
| CD200        | DNPH1               | HLA-DMA         | GSTO1             | FKBP1A-SDCBP2 |
| CD244        | DTHD1               | HLA-DRA         | GZMB              | FUT8          |
| CD248        | DUSP4               | HMGN3           | GZMH              | GALM          |
| CD38         | DYNLL1              | ICOS            | HAVCR2            | GZMB          |
| CD63         | ENTPD1              | ID3             | HLA-DQA1          | GZMH          |
| CD8A         | FABP5               | IFI35           | HLA-DQB1          | HAVCR2        |
| CD8B         | FASLG               | IFNG            | HLA-DRA           | HLA-DMA       |
| CD9          | FKBP1A              | IGFLR1          | HLA-DRB1          | HLA-DQA1      |
| CDC20        | FKBP1A-SDCBP2       | IL2RB           | HLA-DRB5          | HLA-DRA       |
| CDC45        | FKBP5               | ITGAE           | HLA-DRB6          | HLA-DRB1      |
| CDC6         | GALM                | ITM2A           | IFI27L2           | HLA-DRB5      |
| CDCA2        | GPR25               | LAG3            | IFI6              | HLA-DRB6      |
| CDCA3        | GZMB                | LAYN            | IFNG              | ID3           |
| CDCA5        | HAVCR2              | LINC00299       | IGFLR1            | IFI35         |

|             |           |            |          |           |
|-------------|-----------|------------|----------|-----------|
| CDCA8       | HLA-DRA   | LYST       | ISG15    | IFNG      |
| CDK1        | HLA-DRB5  | MIR155HG   | ITGAE    | IGFLR1    |
| CDKN3       | HLA-DRB6  | MIR4632    | ITM2A    | ISG15     |
| CDT1        | HMGN1     | MS4A6A     | LAG3     | ITGAE     |
| CENPA       | ID2       | MTHFD1     | MIR155   | ITM2A     |
| CENPW       | IDH2      | MTHFD2     | MIR155HG | KRT81     |
| CEP55       | IFI35     | MYO1E      | MIR497HG | KRT86     |
| CKAP2L      | IFNG      | MYO7A      | MYO7A    | LAG3      |
| CLEC12A     | IGFLR1    | NAB1       | NAB1     | LAYN      |
| CLIC3       | IL21      | NDFIP2     | NDFIP2   | LINC00299 |
| CLNK        | IL6ST     | PARK7      | PARK7    | MIR155    |
| CLSPN       | ISG15     | PDCD1      | PDCD1    | MIR155HG  |
| CRTAM       | ITGAE     | PHLDA1     | PHLDA1   | MIR4632   |
| CSF1        | ITM2A     | PKM        | PKM      | MIR497HG  |
| CST7        | ITPR1     | PRDM1      | PTTG1    | MTHFD2    |
| CTSW        | KRT81     | PRDX5      | RBPJ     | MYO1E     |
| CXCL13      | KRT86     | PRF1       | SIRPG    | MYO7A     |
| CXXC5       | LAG3      | PRKAR1A    | SIT1     | NAB1      |
| DBN1        | LAYN      | RAB27A     | SNAP47   | NDFIP2    |
| DEPDC1B     | LIMS1     | RALGDS     | TIGIT    | PARK7     |
| DIAPH3      | LINC00892 | RGS1       | TNFRSF18 | PDCD1     |
| DLGAP5      | LRMP      | RGS2       | TNFRSF9  | PHLDA1    |
| DMC1        | MIR155    | SARDH      | TNFSF4   | PKM       |
| DRAXIN      | MIR155HG  | SIRPG      | TNIP3    | PRDX5     |
| DSCC1       | MIR3917   | SNAP47     | TOX      | PRF1      |
| DTL         | MIR4632   | SNX9       | VCAM1    | PTTG1     |
| E2F8        | MIR497HG  | STAT3      |          | RAB27A    |
| EGR2        | MTHFD2    | SYNGR2     |          | RBPJ      |
| ENTPD1      | MYO7A     | TIGIT      |          | RGS1      |
| EOMES       | NAP1L4    | TNFRSF1B   |          | RGS2      |
| ESCO2       | NDFIP2    | TNFRSF9    |          | SARDH     |
| ETV1        | NR3C1     | TOX        |          | SIRPG     |
| EXO1        | PARK7     | TPI1       |          | SIT1      |
| FAM111B     | PDCD1     | TRAFD1     |          | SNAP47    |
| FAM166B     | PDIA6     | UBE2F      |          | SNX9      |
| FAM3C       | PHLDA1    | UBE2F-SCLY |          | STMN1     |
| FAM49A      | PRDX3     | VAPA       |          | SYNGR2    |
| FASLG       | PRDX5     | VCAM1      |          | TIGIT     |
| FBXO43      | PSMB3     | WARS       |          | TNFRSF18  |
| FCGR3A      | PSMC3     | YARS       |          | TNFRSF9   |
| FCRL3       | PSMD4     |            |          | TNFSF4    |
| FXYD2       | PSMD8     |            |          | TNIP3     |
| FXYD6-FXYD2 | PTPN13    |            |          | TOX       |
| GABARAPL1   | PTTG1     |            |          | TPI1      |
| GCNT1       | RAB27A    |            |          | VCAM1     |

|           |          |       |
|-----------|----------|-------|
| GEM       | RANBP1   | ZBED2 |
| GFOD1     | RBPJ     |       |
| GGH       | RGS1     |       |
| GINS1     | RGS2     |       |
| GINS2     | RNF19A   |       |
| GNG4      | SAMSN1   |       |
| GNGT2     | SARDH    |       |
| GNLY      | SIRPG    |       |
| GOLIM4    | SIT1     |       |
| GPA33     | SMCO4    |       |
| GTSE1     | SNAP47   |       |
| GZMA      | SNRPB    |       |
| GZMB      | SNX9     |       |
| GZMH      | SRGN     |       |
| HAVCR2    | STMN1    |       |
| HIST1H1B  | STRA13   |       |
| HIST1H2AL | SYNGR2   |       |
| HJURP     | TIGIT    |       |
| HLA-DMA   | TMEM243  |       |
| HLA-DQA1  | TNFRSF18 |       |
| HLA-DQA2  | TNFRSF1B |       |
| HLA-DRB1  | TNFRSF9  |       |
| HLA-DRB6  | TNFSF8   |       |
| HMMR      | TNIP3    |       |
| HMOX1     | TOX      |       |
| ID3       | TPI1     |       |
| IFITM10   | UBE2L6   |       |
| IFNG      | VCAM1    |       |
| IGFBP6    | YWHAQ    |       |
| IRF8      | ZBED2    |       |
| ITGA1     |          |       |
| ITGA2     |          |       |
| ITGAE     |          |       |
| ITM2C     |          |       |
| KIF14     |          |       |
| KIF15     |          |       |
| KIF18B    |          |       |
| KIF23     |          |       |
| KIF2C     |          |       |
| KIF4A     |          |       |
| KIR2DL3   |          |       |
| KIR2DL4   |          |       |
| KLRC1     |          |       |
| KLRC2     |          |       |
| KLRC3     |          |       |

KLRC4  
KLRC4-KLRK1  
KLRD1  
KLRK1  
KRT81  
KRT86  
LAG3  
LAYN  
LILRB1  
LILRP2  
LIMK1  
LINC00158  
LINC00299  
LRRC28  
MCM10  
MCM2  
MCM4  
MELK  
MKI67  
MND1  
MTFR2  
MYBL2  
MYO1E  
MYO7A  
NCAPG  
NCR1  
NEIL3  
NEK2  
NHS  
NKG7  
NUF2  
ORC1  
ORC6  
P2RY1  
PBK  
PDLIM4  
PHEX  
PHGDH  
PHLDA1  
PIK3AP1  
PIK3R6  
PKMYT1  
PLCG2  
PLK1  
POC1A

POLQ  
PON2  
PON3  
PRF1  
PROX2  
PRR11  
PRSS30P  
PTGIS  
PTMS  
PTPRK  
QPRT  
RAD51  
RAD51AP1  
RDH10  
REEP2  
REG4  
RGS13  
RRM2  
SEMA4A  
SFTPB  
SHCBP1  
SKA1  
SKA3  
SLAMF7  
SLC17A9  
SLC2A8  
SLC43A3  
SMIM10  
SPAG5  
SPC24  
SPC25  
SPRY1  
SPRY2  
STMN1  
STYK1  
SYNGR1  
TIGIT  
TIMD4  
TK1  
TMEM155  
TNFRSF9  
TNFSF4  
TNFSF9  
TNIP3  
TNS3

TOP2A  
TPX2  
TRIP13  
TROAP  
TSPAN13  
TTC24  
TTK  
TYMS  
UBE2C  
UBE2T  
UHRF1  
VCAM1  
WDHD1  
WIPF3  
XCL2  
XRCC2  
YBX3  
ZBED2  
ZBTB32  
ZC3H12C  
ZNF683  
ZWINT

**Present in all 4**

CCL3  
CSF1  
CTLA4  
CXCL13  
CXCR6  
HAVRC2  
IFNG  
ITGAE  
LAG3  
LYST  
MYO7A  
PDCD1  
PHLDA1  
RAB27A  
SNAP47  
TNFRSF1B  
TNFRSF9

**Supplementary Table 3: Dysfunctional 41BB-based CAR T cell (Tbbd) gene signature of dysfu**

*ABCG1*  
*ADAM8*  
*AHI1*  
*AKNA*  
*ALOX5AP*  
*ANKRD12*  
*ANKRD28*  
*AOAH*  
*ARHGAP9*  
*ARHGEF12*  
*ASB2*  
*ATP8B4*  
*BCL2L11*  
*CAMK4*  
*CBLB*  
*CCL5*  
*CCR8*  
*CD2*  
*CD27*  
*CD37*  
*CD3D*  
*CD52*  
*CD63*  
*CD69*  
*CD8A*  
*CD8B*  
*CD96*  
*CDKN1B*  
*CFLAR*  
*CLEC2B*  
*CLEC2D*  
*CLSTN3*  
*CST7*  
*CTSW*  
*CXCR6*  
*CYTH4*  
*DAPK2*  
*DDHD1*  
*DDX17*  
*DOCK8*  
*DUSP1*  
*ELF1*  
*ENTPD1*



ERN1  
EVA1B  
EVI2B  
EVL  
FASLG  
FCER1G  
FYB1  
GABARAPL1  
GADD45B  
GCNT1  
GLIPR1  
GNLY  
GOLGA8A  
GOLGA8B  
GPR171  
GPR174  
GZMK  
HAVCR2  
HCST  
HOPX  
HSH2D  
ID2  
IER5L  
IGFLR1  
IKZF2  
IL10RA  
IL16  
IL2RG  
IL9R  
INPP5D  
ITGA1  
ITGAX  
JAK3  
JAML  
JUN  
KDM5B  
KIT  
KLF6  
KLRB1  
KLRC2  
KLRC3  
KLRC4  
KLRD1  
KLRK1  
KMT2E

LNPEP  
LRRC28  
LYST  
MCL1  
MCTP2  
MEF2A  
NBL1  
NCAM1  
NCF4  
NCR3  
NELL2  
NFATC3  
NLRC3  
NT5E  
OGT  
PAG1  
PDCD4  
PDE3B  
PDE7A  
PDE7B  
PGGHG  
PLAAT4  
PPP1R15A  
PRF1  
PRKCA  
PTGER4  
PTPN22  
RAB24  
RAB37  
RASGRP1  
RBM39  
RBPJ  
REG4  
RESF1  
RIN3  
RPS6KA3  
SCLY  
SERPINE1  
SIRPG  
SKAP1  
SLAMF7  
SLC1A4  
SMAD3  
SRGAP3  
SYTL2

TGFB1  
THEMIS  
TMX4  
TNFAIP3  
TSC22D3  
TSPAN32  
TTN  
TXNIP  
XAF1  
XCL1  
YPEL3  
ZNF217

nction
